# Supplementary material for: Bimetallic CuFe nanoparticles as active and stable catalysts for chemoselective hydrogenation of biomass-derived platform molecules
Source: Royal Society of Chemistry journal article supplement (doi:10.1039/d1cy00339a), 2021-01-01
Supplement: d1cy00339a1.pdf [file d1cy00339a1.pdf]

## Supporting Information

### **Bimetallic CuFe nanoparticles as active and stable catalyst for chemoselective hydrogenation of biomass derived platform molecules**

Karen S. Arias,<sup>†</sup> Lichen Liu,<sup>†</sup> Andrea Garcia-Ortiz, Maria J. Climent, Patricia Concepcion, Sara Iborra,\* Avelino Corma\*,

*Instituto de Tecnología Química, Universidad Politécnica de Valencia-Consejo Superior de Investigaciones Científicas (UPV-CSIC), Av. de los Naranjos s/n, 46022 Valencia, Spain*

<sup>†</sup> These authors contribute equally to this work.

\*Corresponding authors. E-mail: [acorma@itq.upv.es](mailto:acorma@itq.upv.es) (A.C.) [siborra@itq.upv.es](mailto:siborra@itq.upv.es) (S.I.)

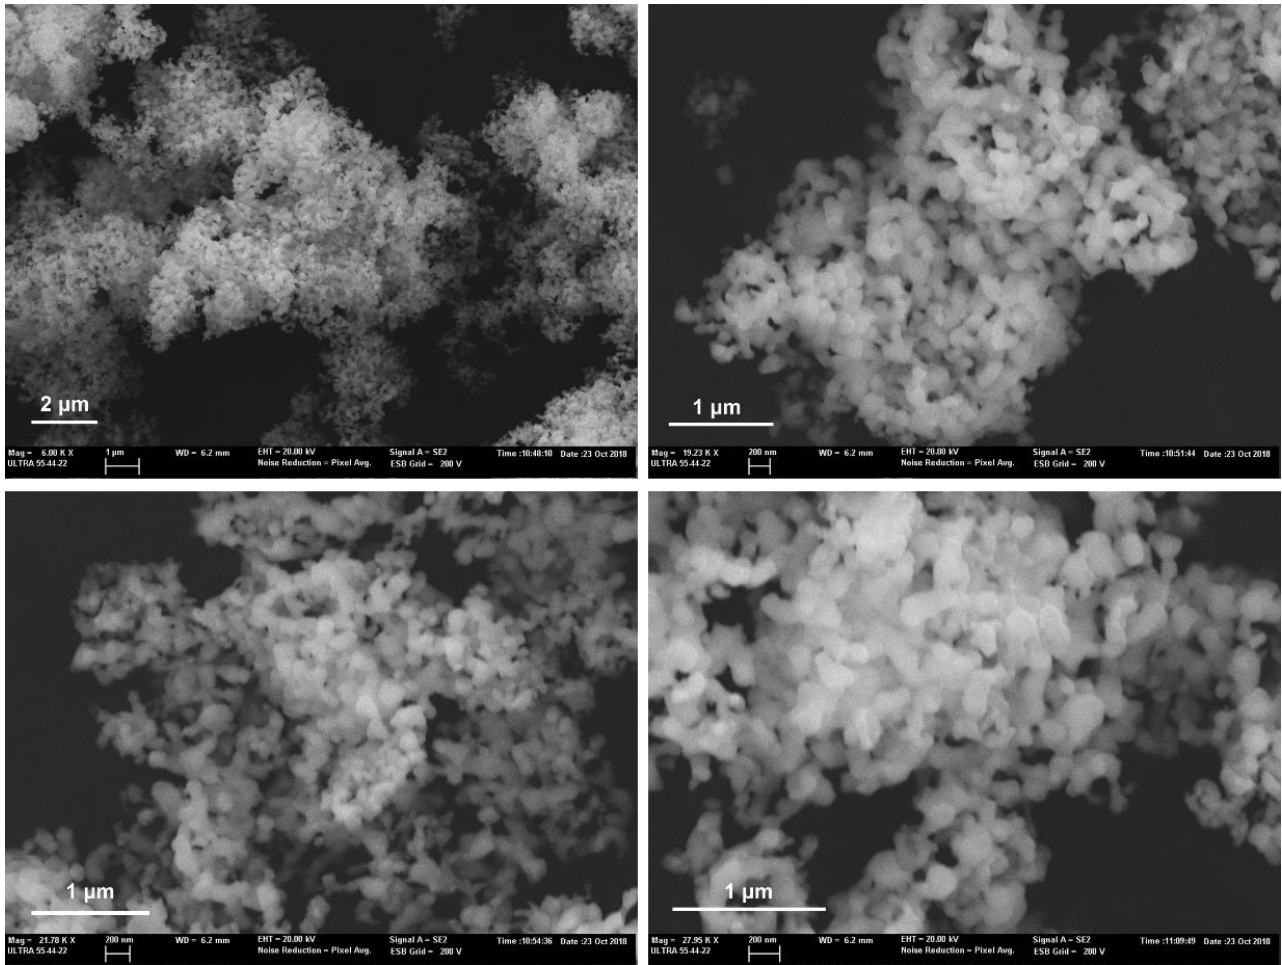

**Figure S1.** FESEM images of Fe@C sample. Fe nanoparticles of 50-200 nm can be observed.

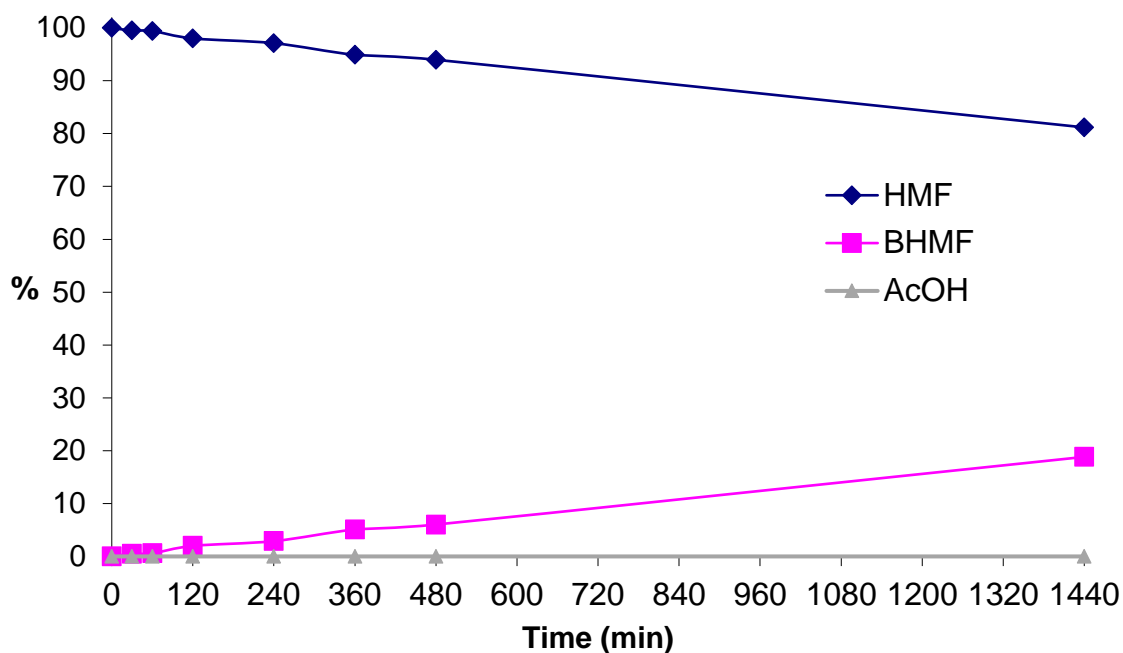

**Figure S2.** Catalytic performance of Fe@C catalyst after pre-reduction treatment.

The catalyst (10 mg) has been pre-reduced by H<sub>2</sub> (10 bar) at 260 °C for 6 h in autoclave before of reaction. HMF, dodecane and MeOH were dried previously with molecular sieves and N<sub>2</sub> flow. After the pre-reduction treatment, a solution of HMF (0.5 mmol) in MeOH (5 mL) and dodecane as standard was transferred to autoclave at room temperature with a syringe and was purged three times with H<sub>2</sub>. Then the autoclave was pressurized with 10 bar of H<sub>2</sub>. The stirring speed is kept at 1000 rpm and the reactor was heated at 110 °C.

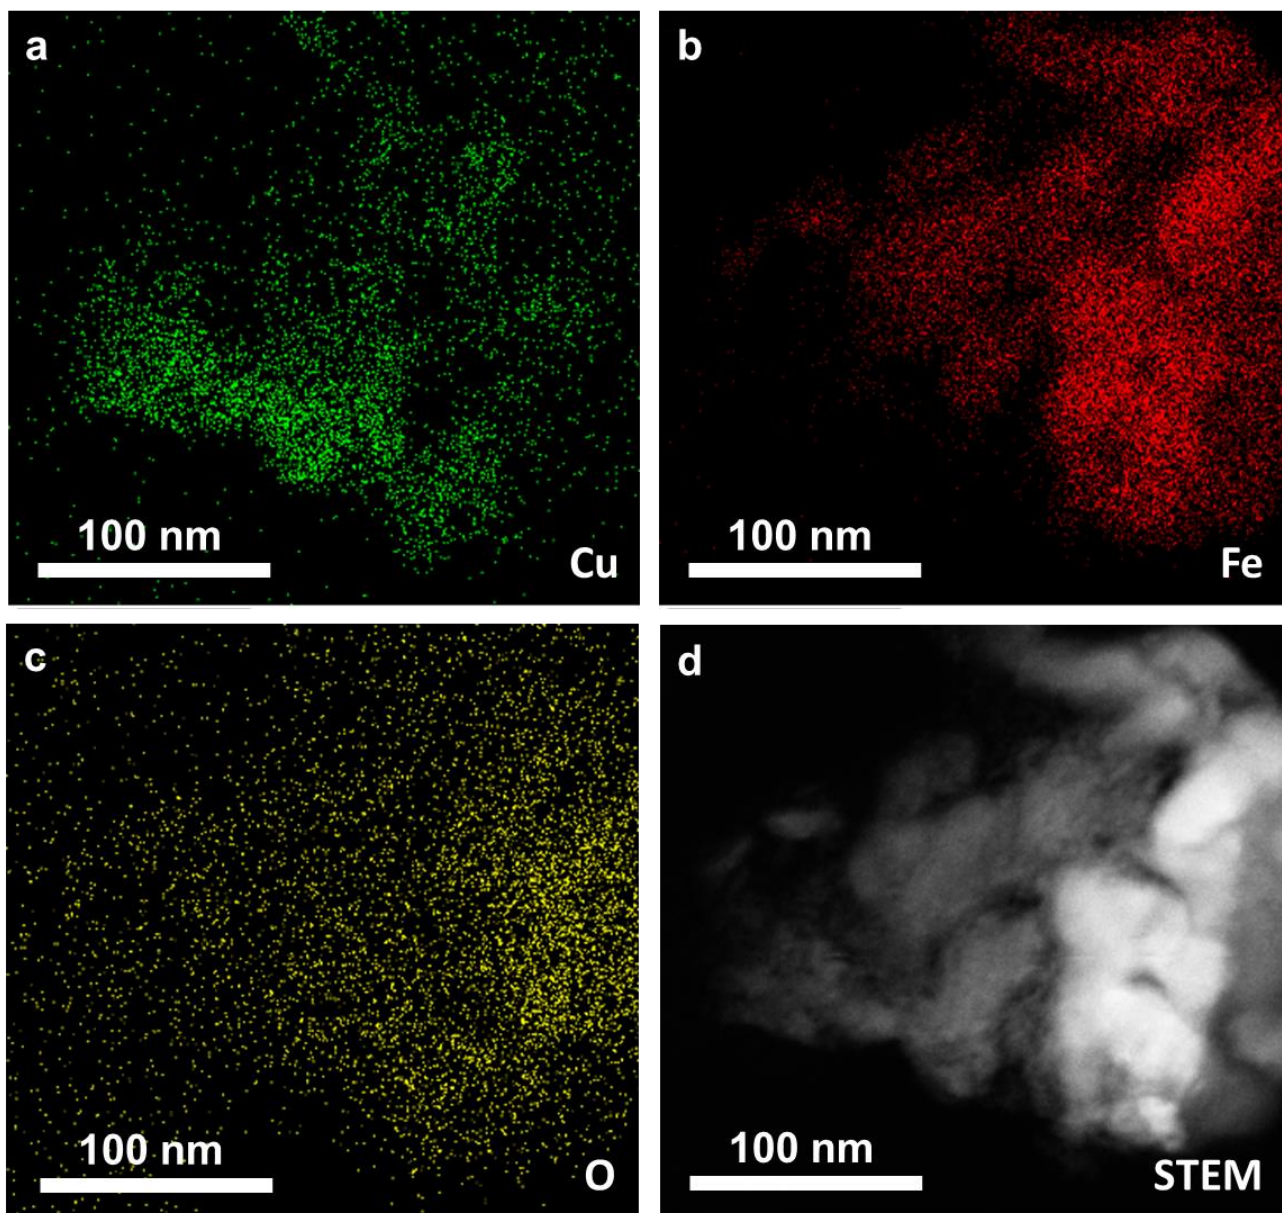

**Figure S3.** Morphological characterization of 25Cu/Fe@C sample by STEM-EDS mapping with 25 wt% of Cu. In these images, Cu nanoparticles as well as highly dispersed Cu species on Fe@C nanoparticles can be observed.

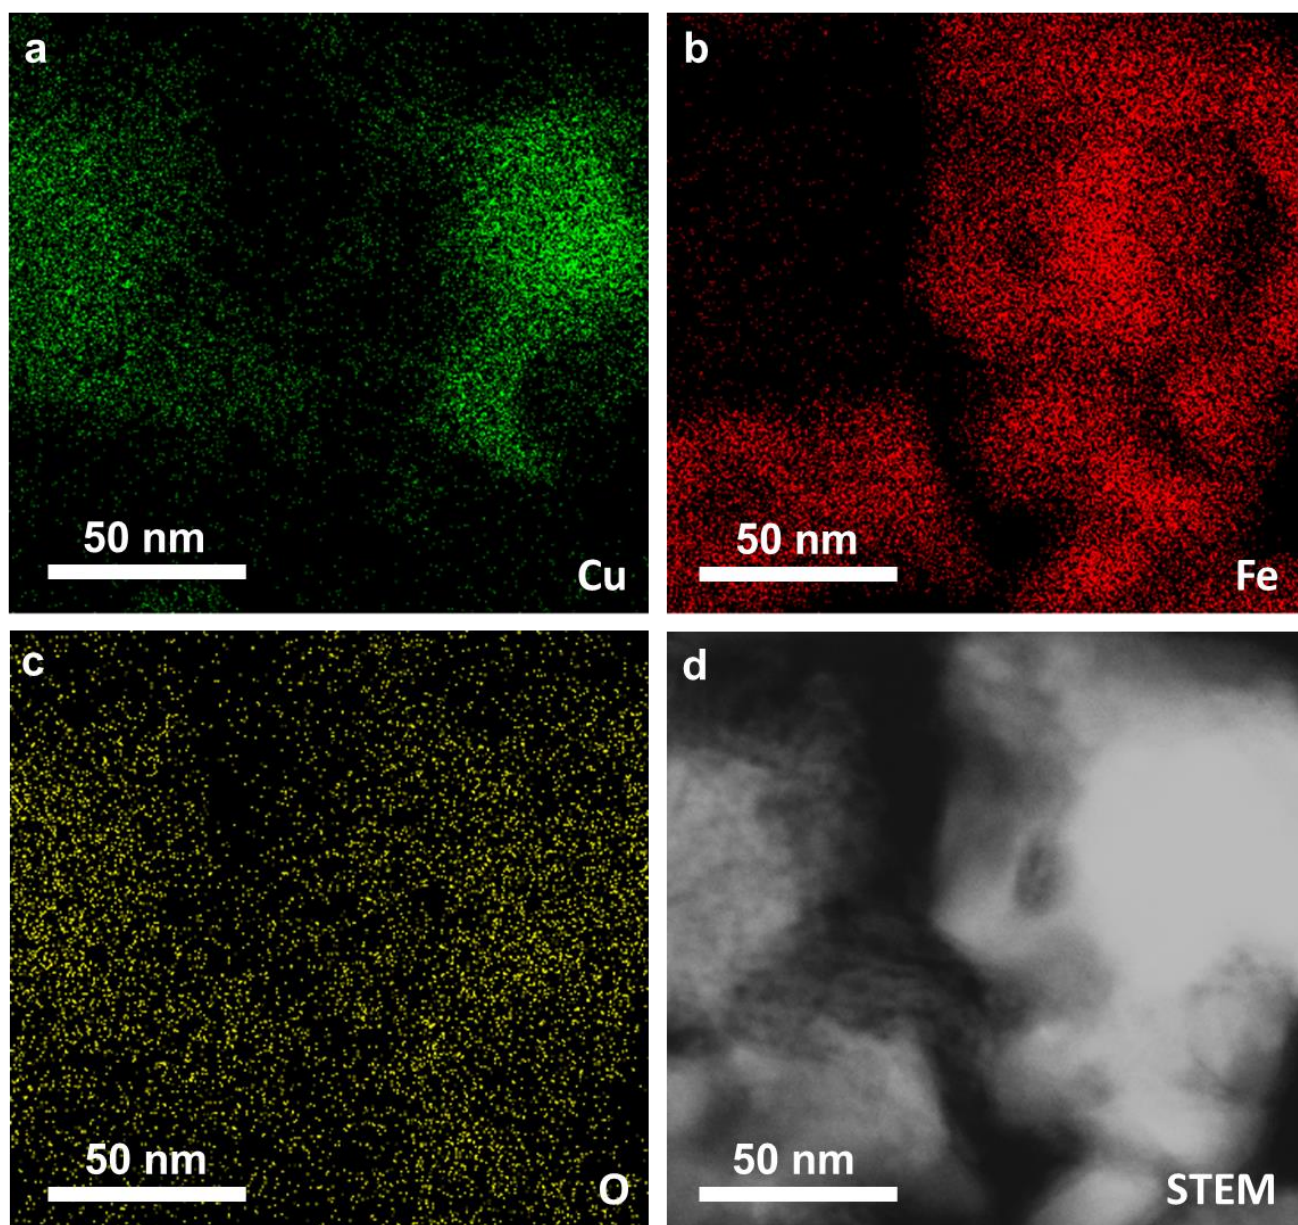

**Figure S4.** Morphological characterization of 25Cu/Fe@C sample by STEM-EDS mapping with 25 wt% of Cu. In these images, Cu nanoparticles as well as highly dispersed Cu species on Fe@C nanoparticles can be observed.

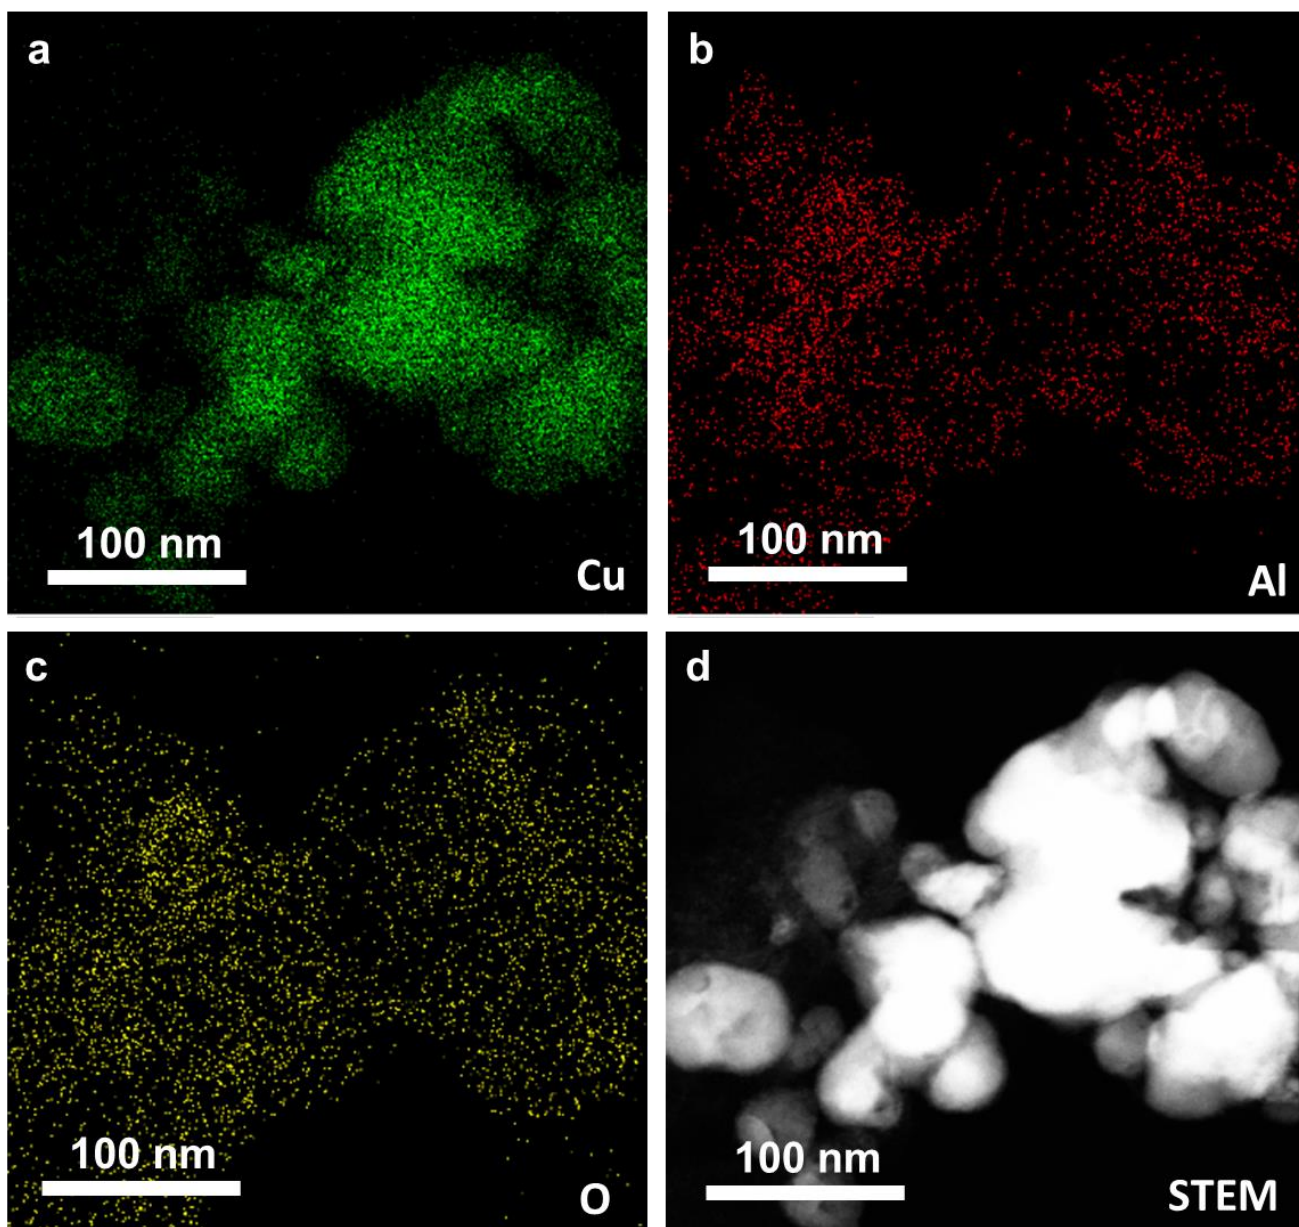

**Figure S5.** Morphological characterization of  $25\text{Cu}/\text{Al}_2\text{O}_3$  sample by STEM-EDS mapping. In these images, Cu nanoparticles as well as highly dispersed Cu species on  $\text{Al}_2\text{O}_3$  can be observed.

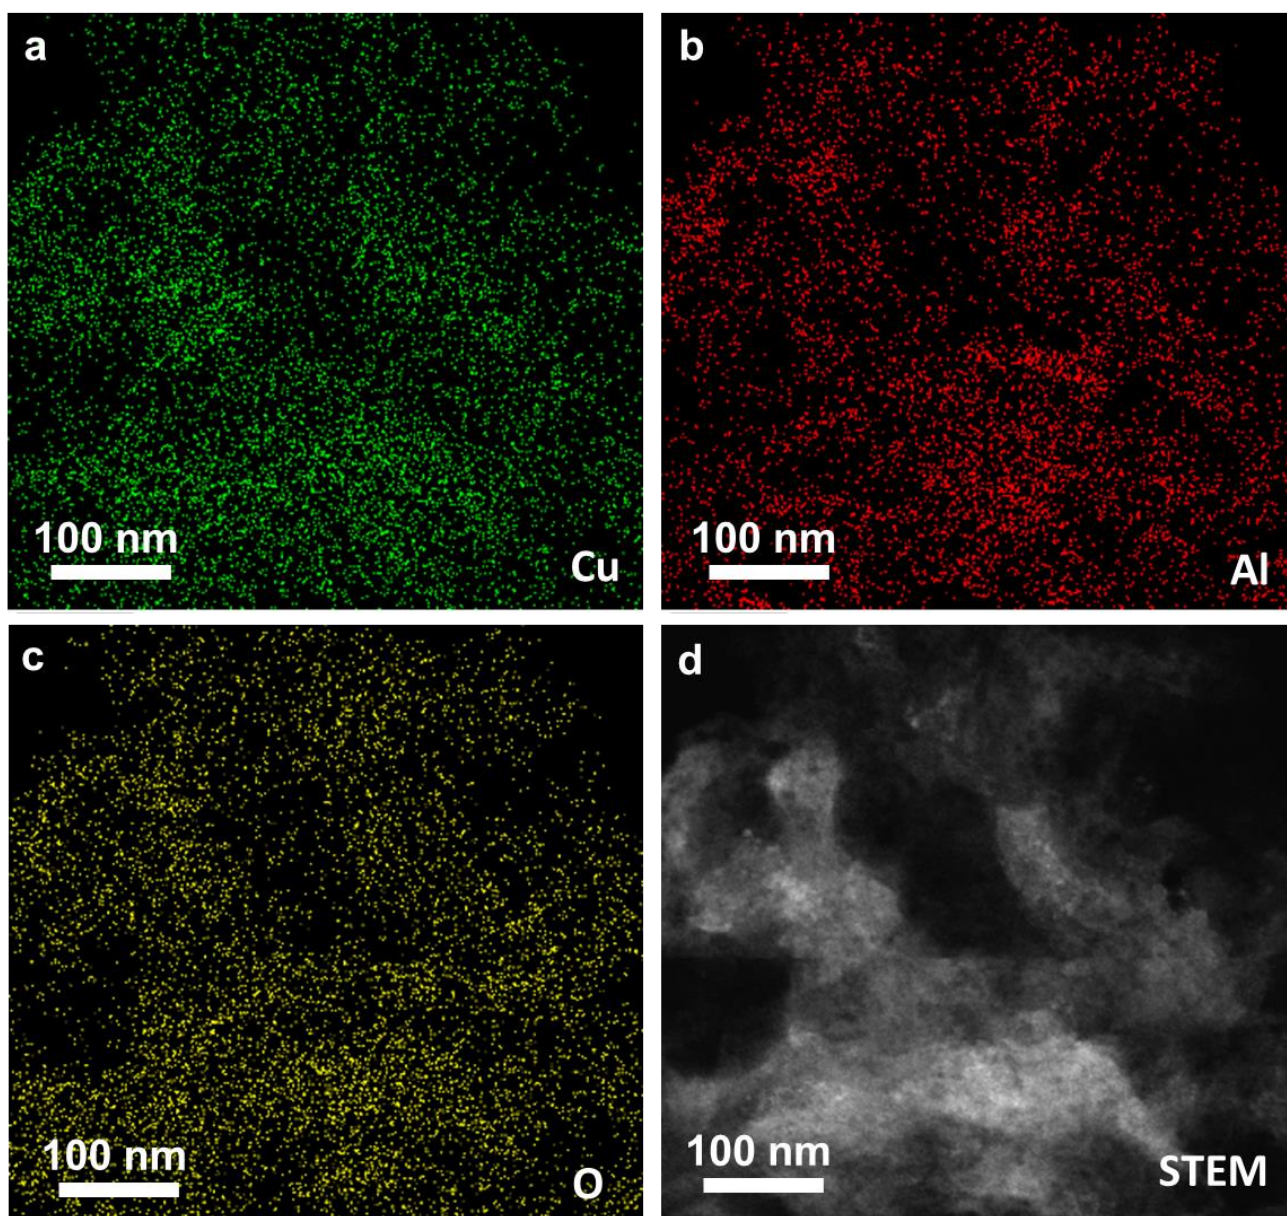

**Figure S6.** Morphological characterization of 25Cu/Al<sub>2</sub>O<sub>3</sub> sample by STEM-EDS mapping. In these images, Cu nanoparticles as well as highly dispersed Cu species on Al<sub>2</sub>O<sub>3</sub> can be observed.

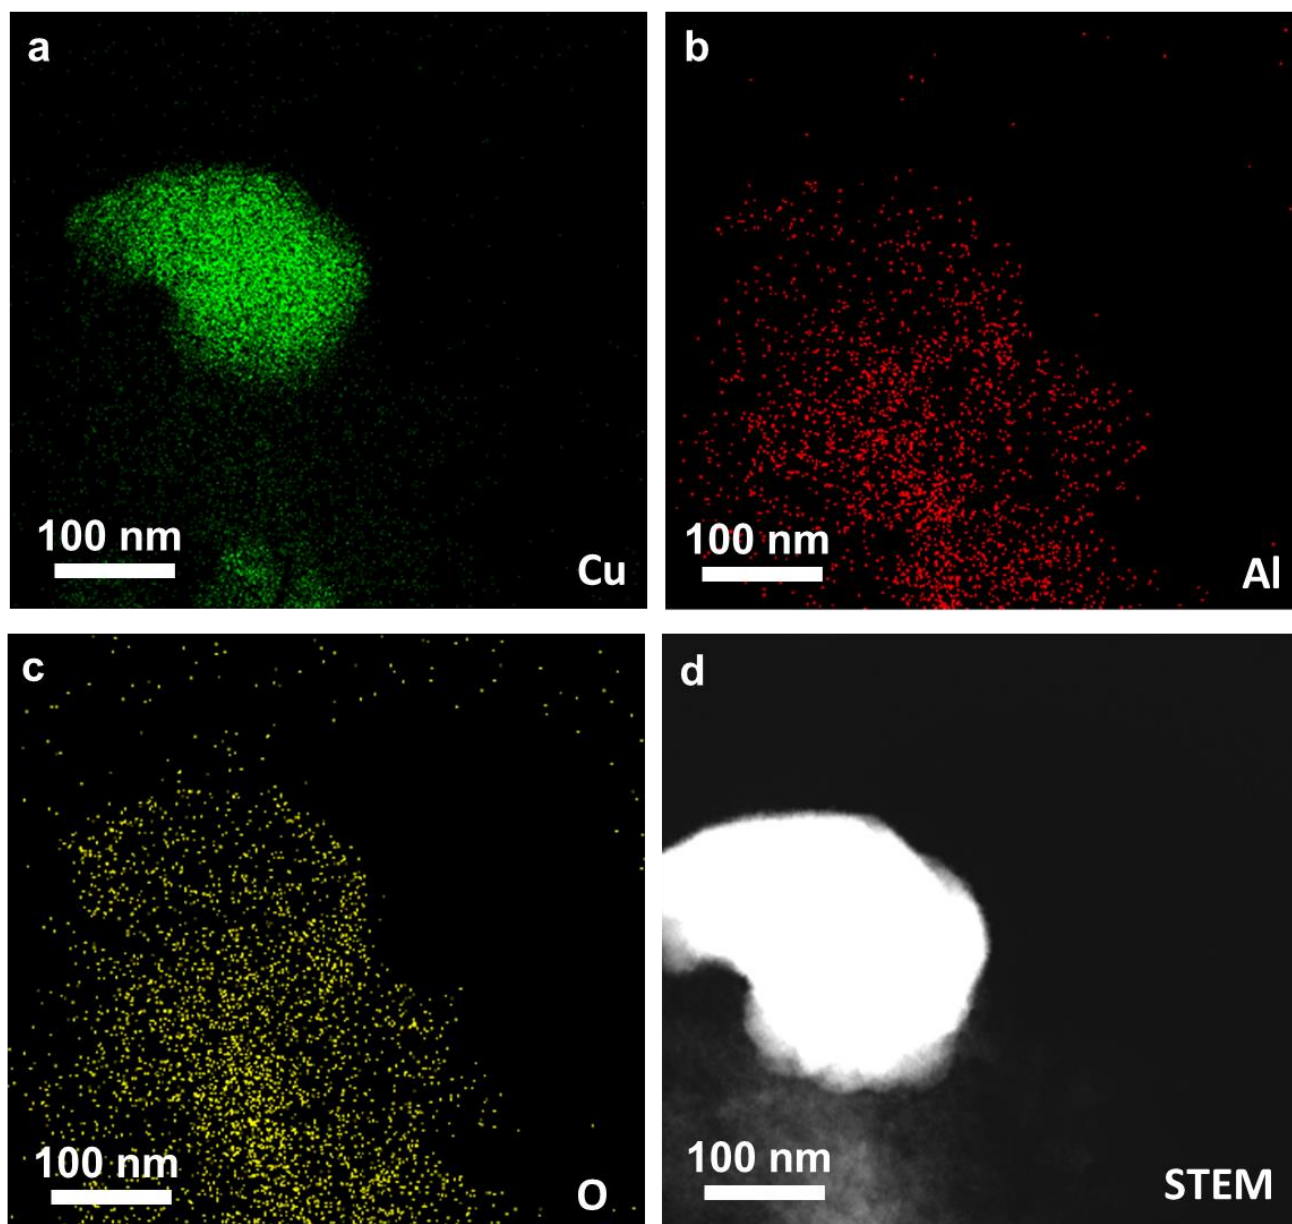

**Figure S7.** Morphological characterization of  $^{25}\text{Cu}/\text{Al}_2\text{O}_3$  sample by STEM-EDS mapping. In these images, Cu nanoparticles as well as highly dispersed Cu species on  $\text{Al}_2\text{O}_3$  can be observed.



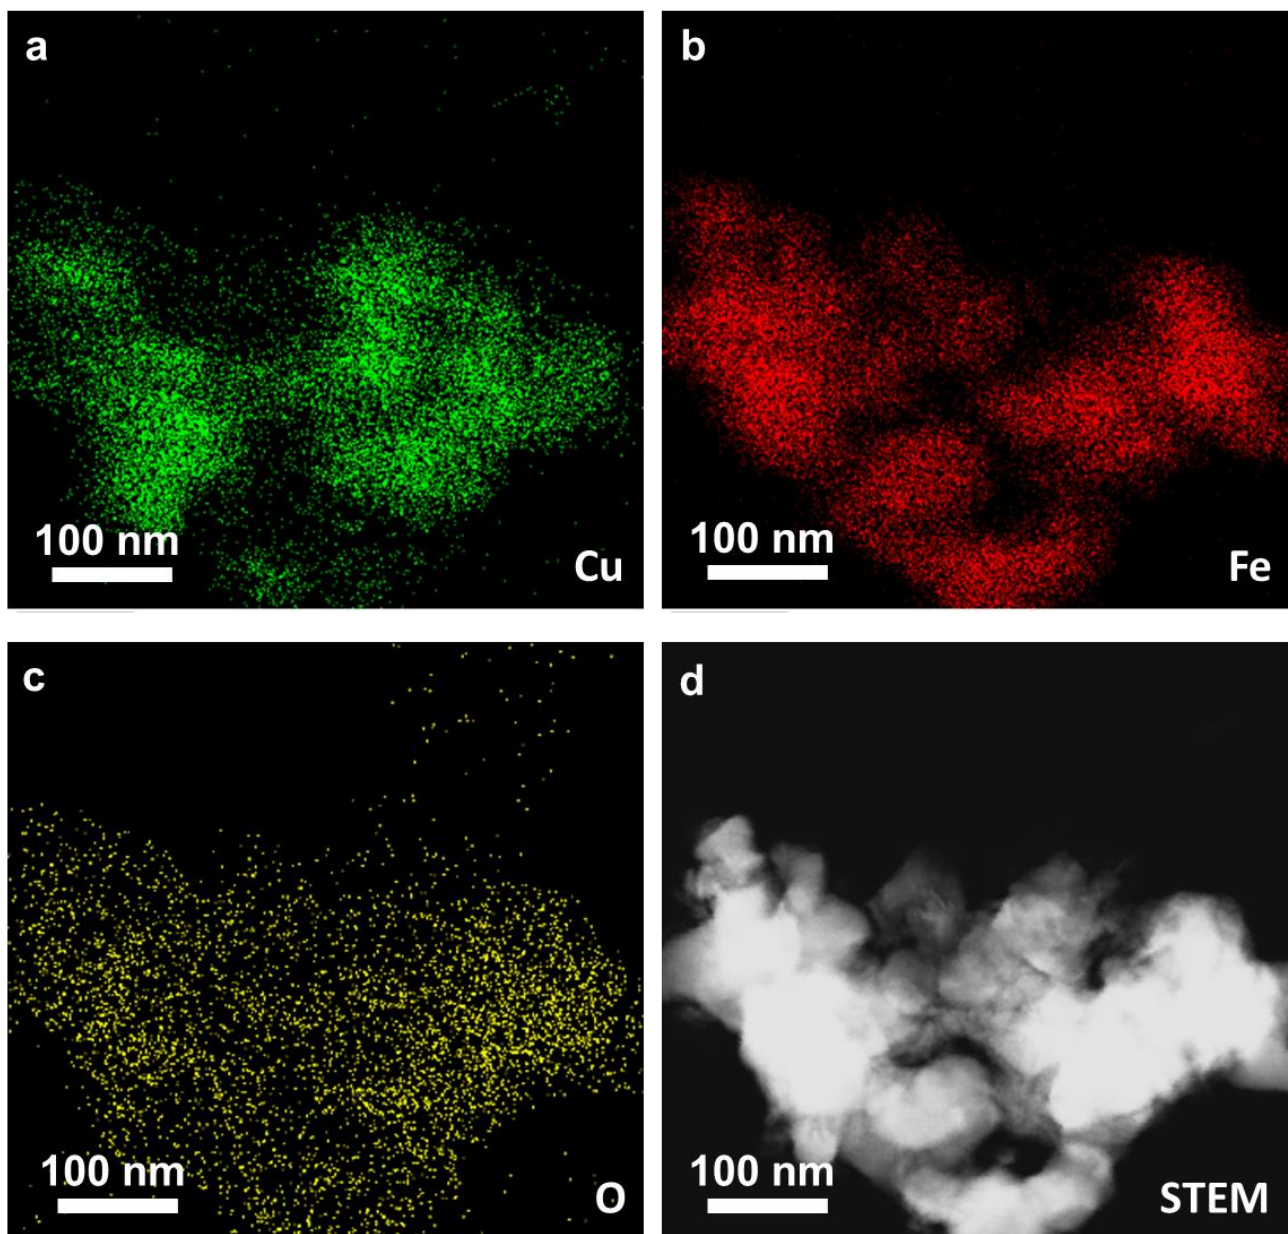

**Figure S8.** Morphological characterization of 25Cu/Fe<sub>2</sub>O<sub>3</sub> sample by STEM-EDS mapping. In these images, Cu nanoparticles as well as highly dispersed Cu species on the Fe support can be observed.

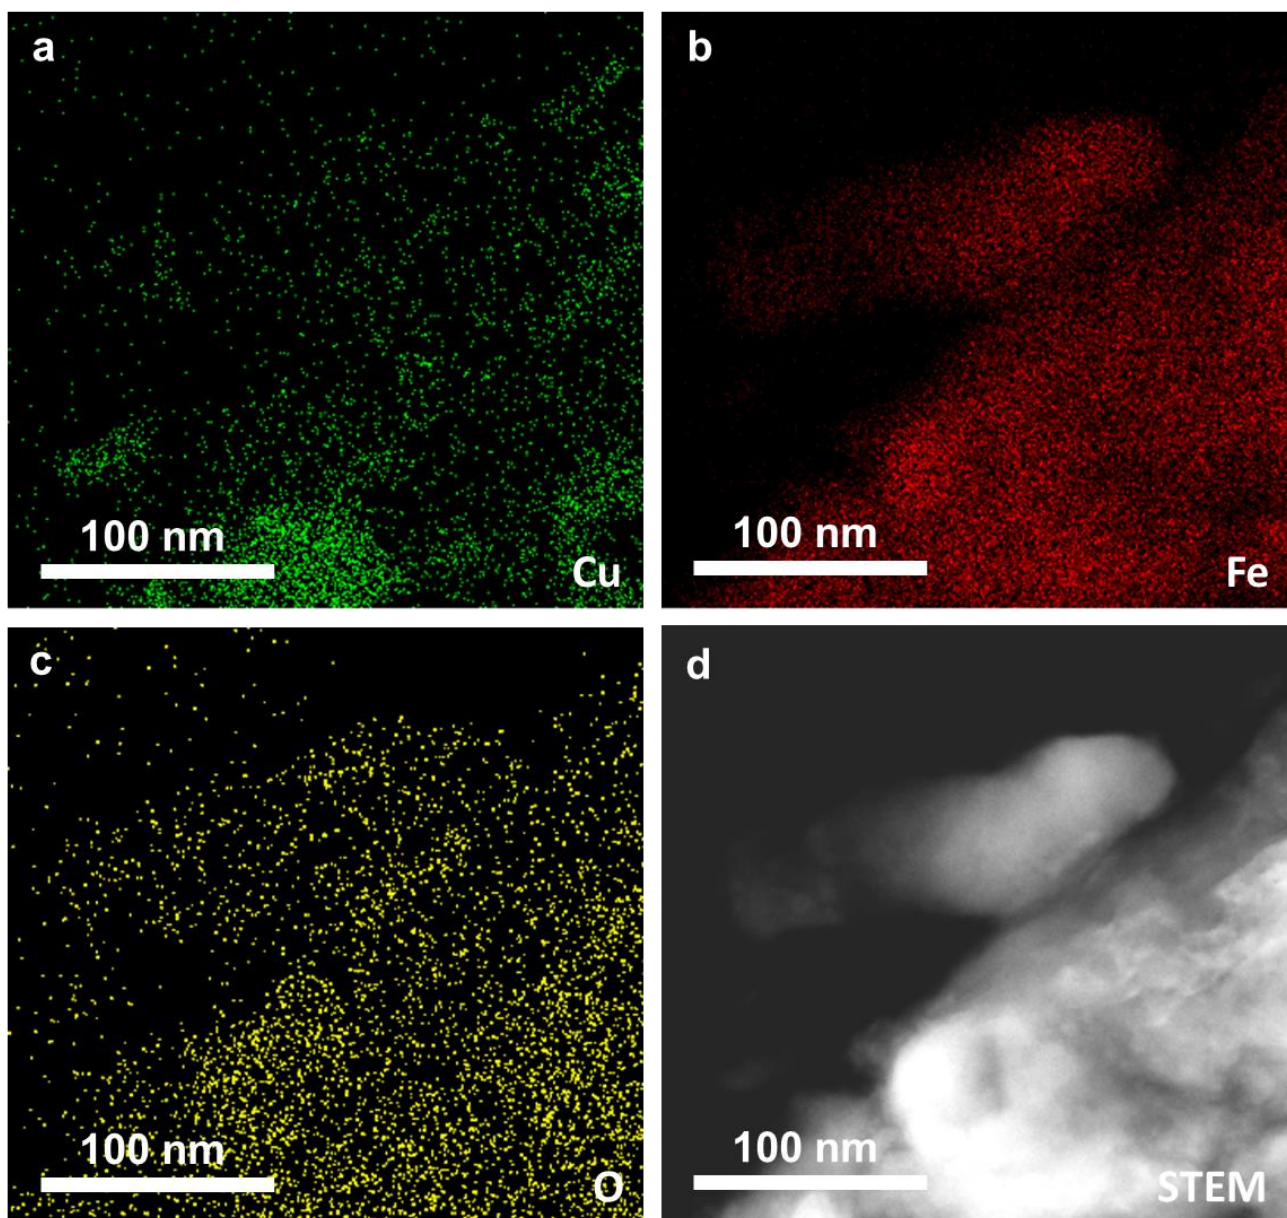

**Figure S9.** Morphological characterization of  $25\text{Cu}/\text{Fe}_2\text{O}_3$  sample by STEM-EDS mapping. In these images, Cu nanoparticles as well as highly dispersed Cu species on the Fe support can be observed.

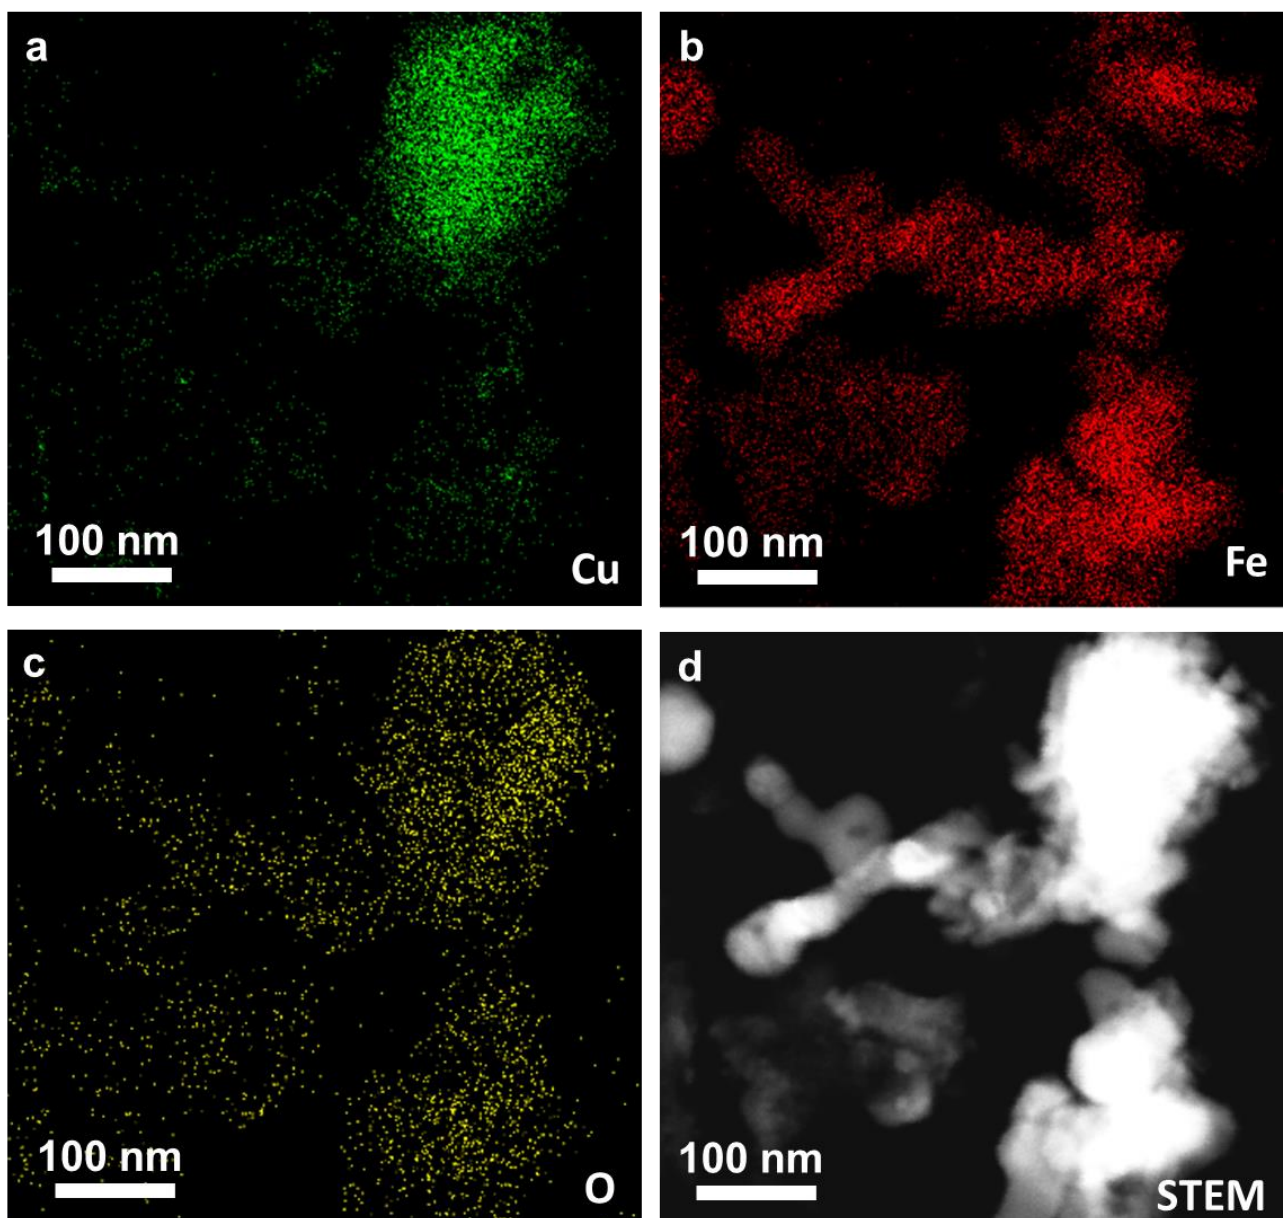

**Figure S10.** Morphological characterization of 25Cu/Fe<sub>2</sub>O<sub>3</sub> sample by STEM-EDS mapping. In these images, Cu nanoparticles as well as highly dispersed Cu species on the Fe support can be observed.

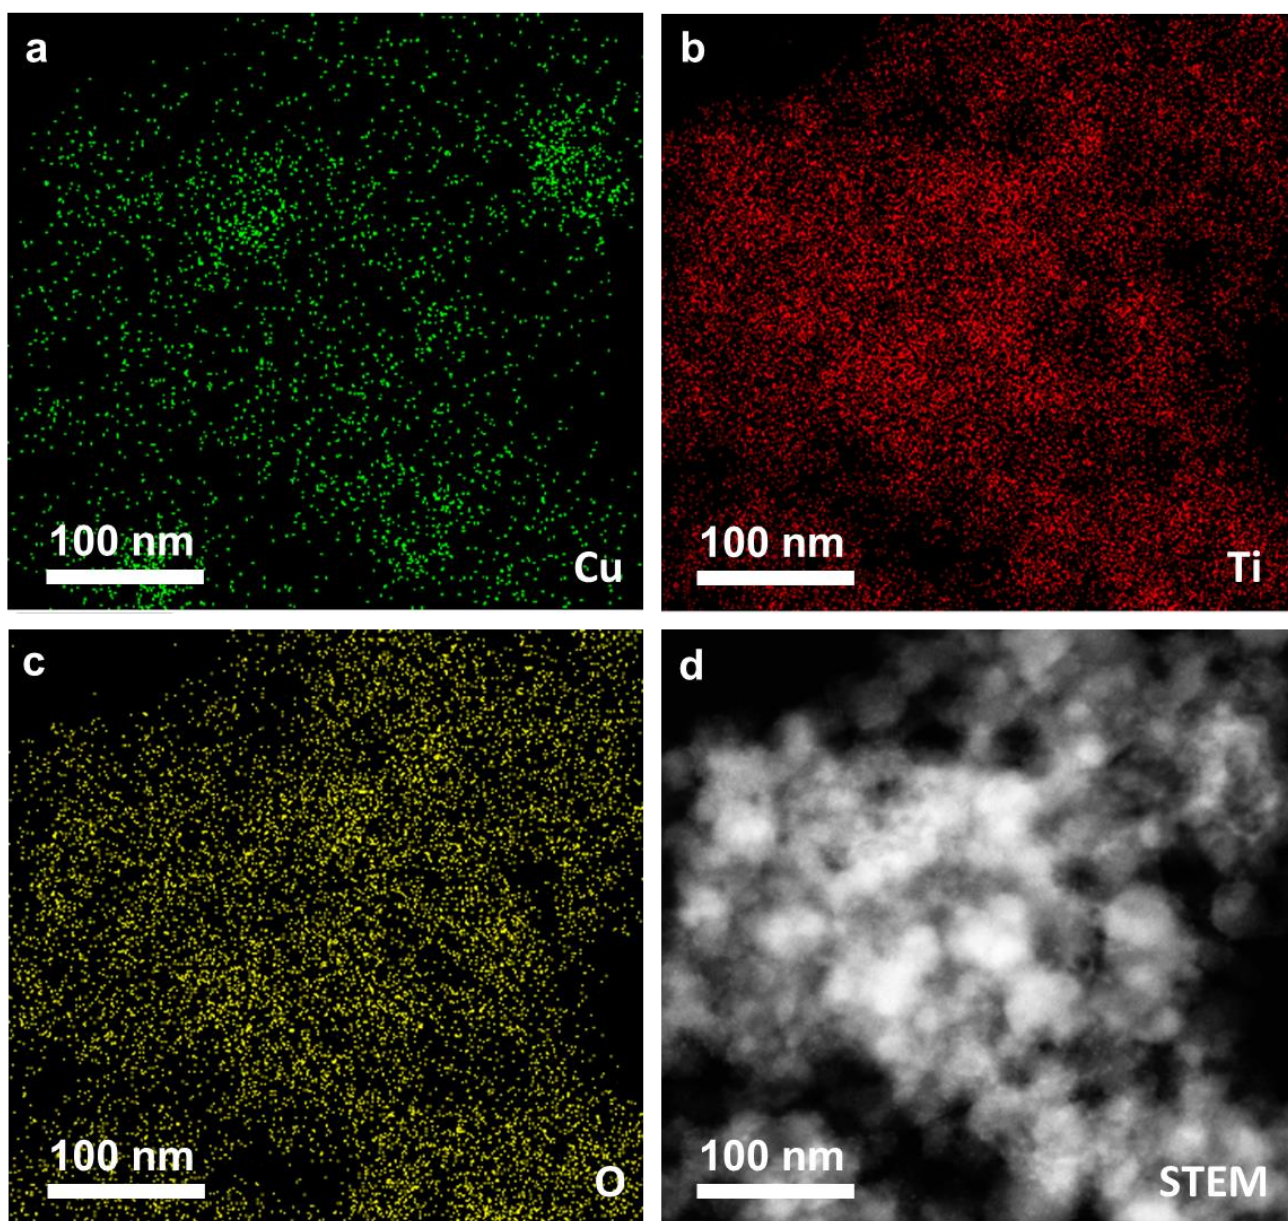

**Figure S11.** Morphological characterization of 25Cu/TiO<sub>2</sub> sample by STEM-EDS mapping. In these images, Cu nanoparticles as well as highly dispersed Cu species on TiO<sub>2</sub> can be observed.

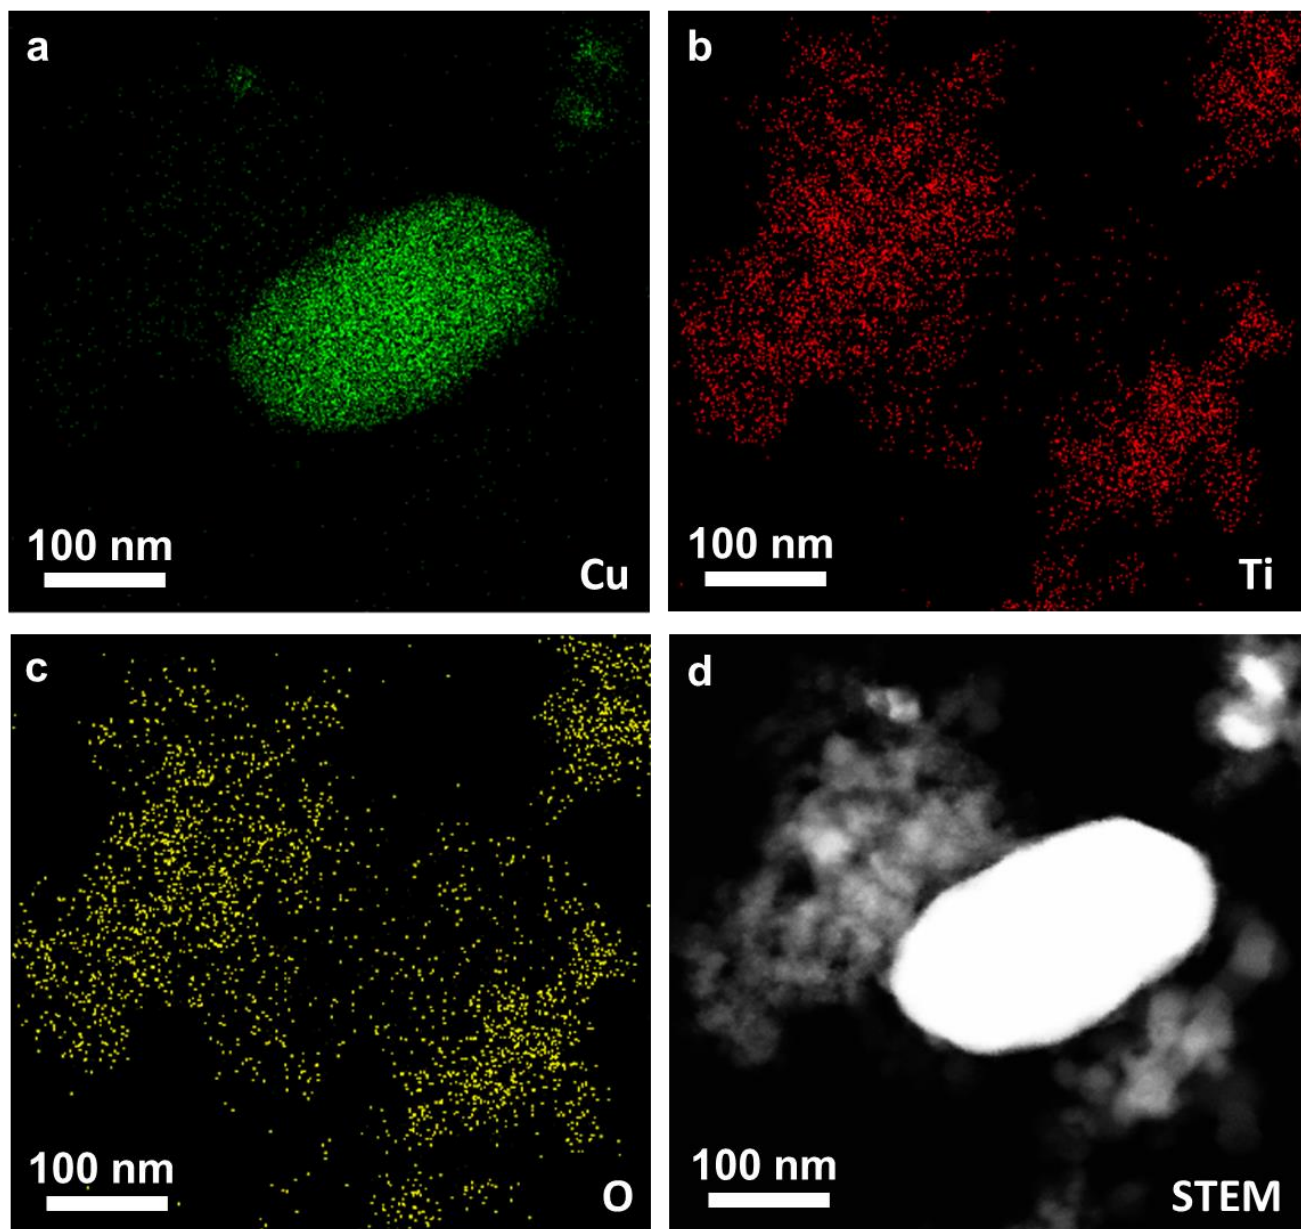

**Figure S12.** Morphological characterization of 25Cu/TiO<sub>2</sub> sample by STEM-EDS mapping. In these images, Cu nanoparticles as well as highly dispersed Cu species on TiO<sub>2</sub> can be observed.

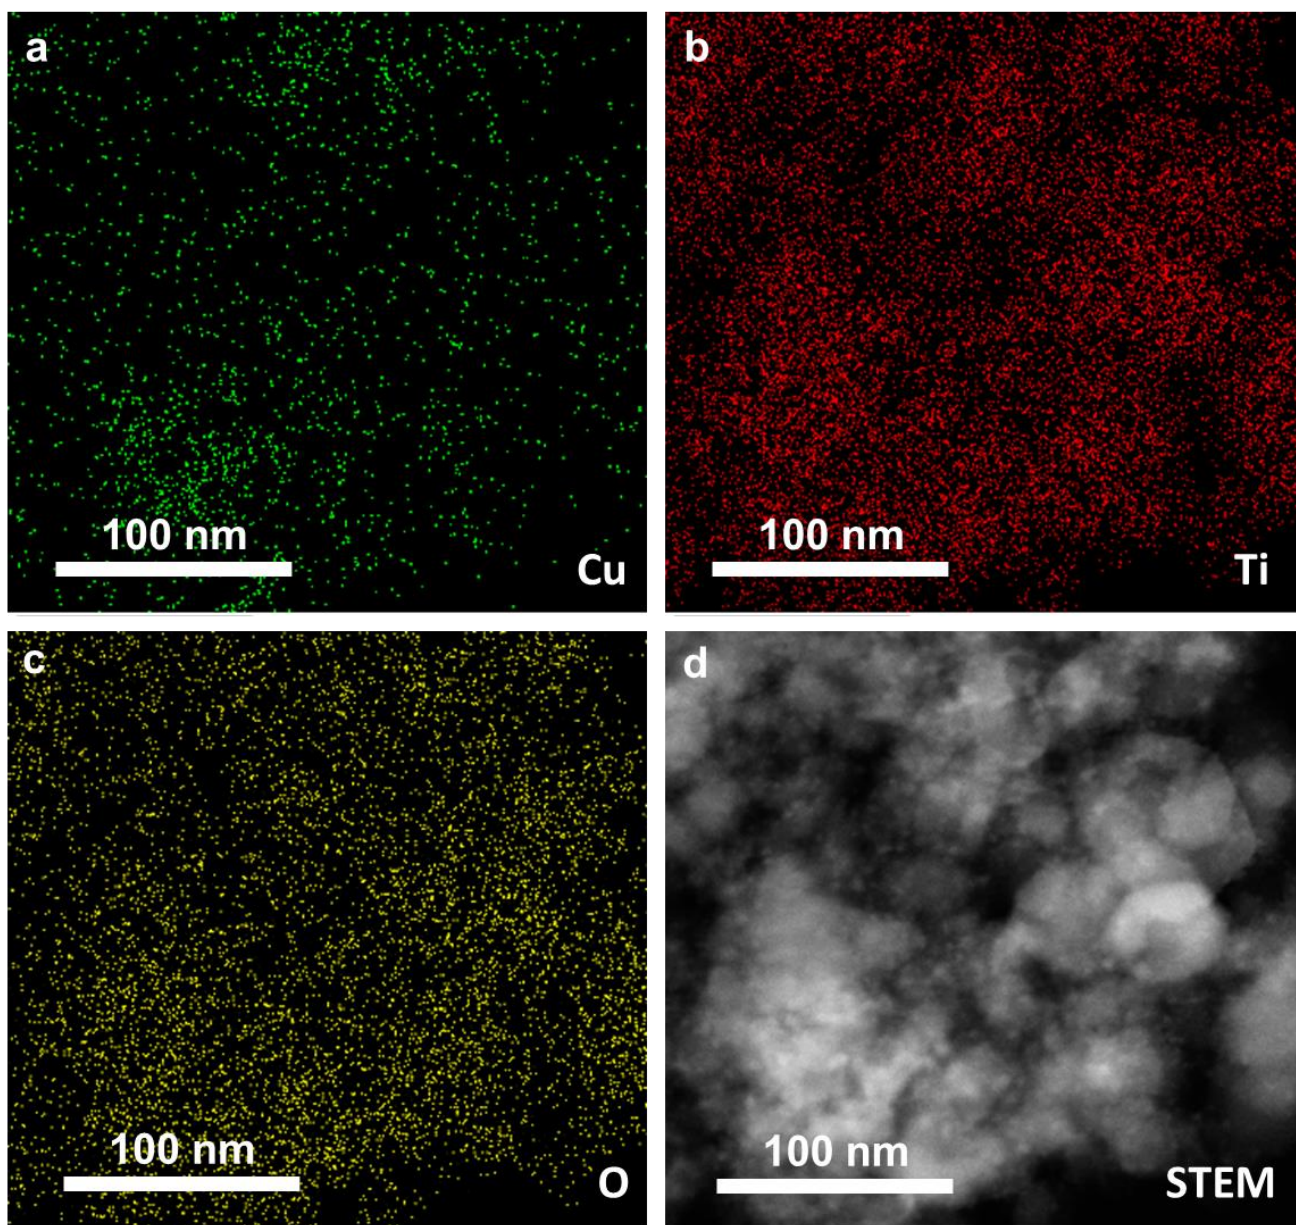

**Figure S13.** Morphological characterization of 25Cu/TiO<sub>2</sub> sample by STEM-EDS mapping. In these images, Cu nanoparticles as well as highly dispersed Cu species on TiO<sub>2</sub> can be observed.

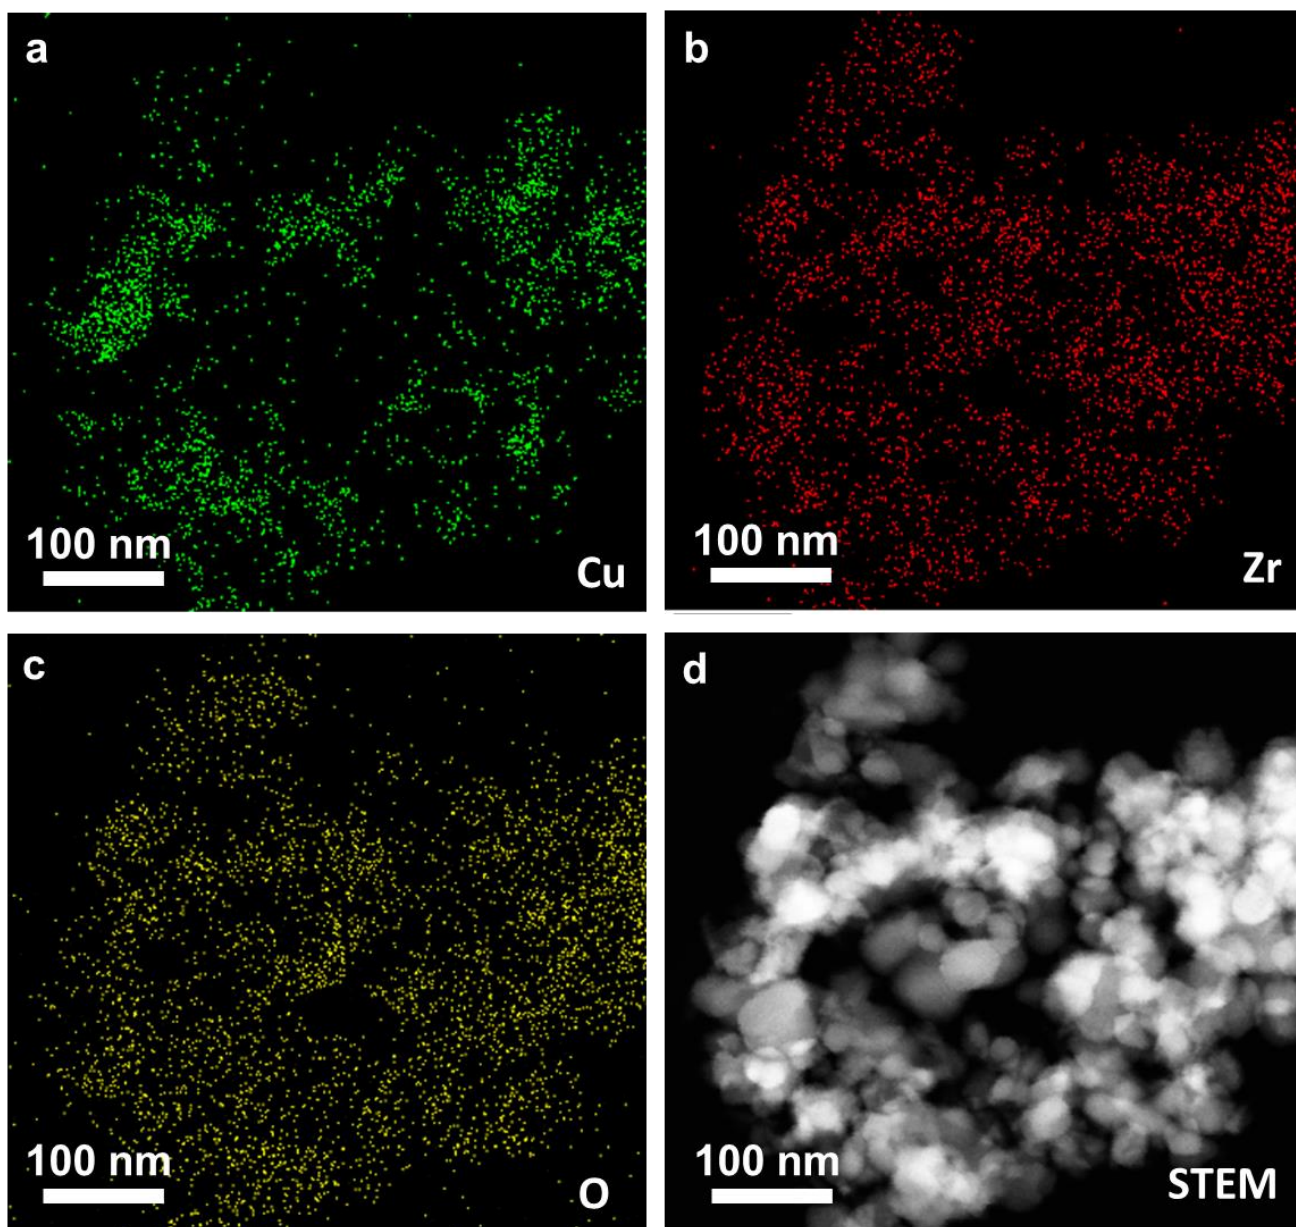

**Figure S14.** Morphological characterization of  $25\text{Cu}/\text{ZrO}_2$  sample by STEM-EDS mapping. In these images, Cu nanoparticles as well as highly dispersed Cu species on  $\text{ZrO}_2$  can be observed.

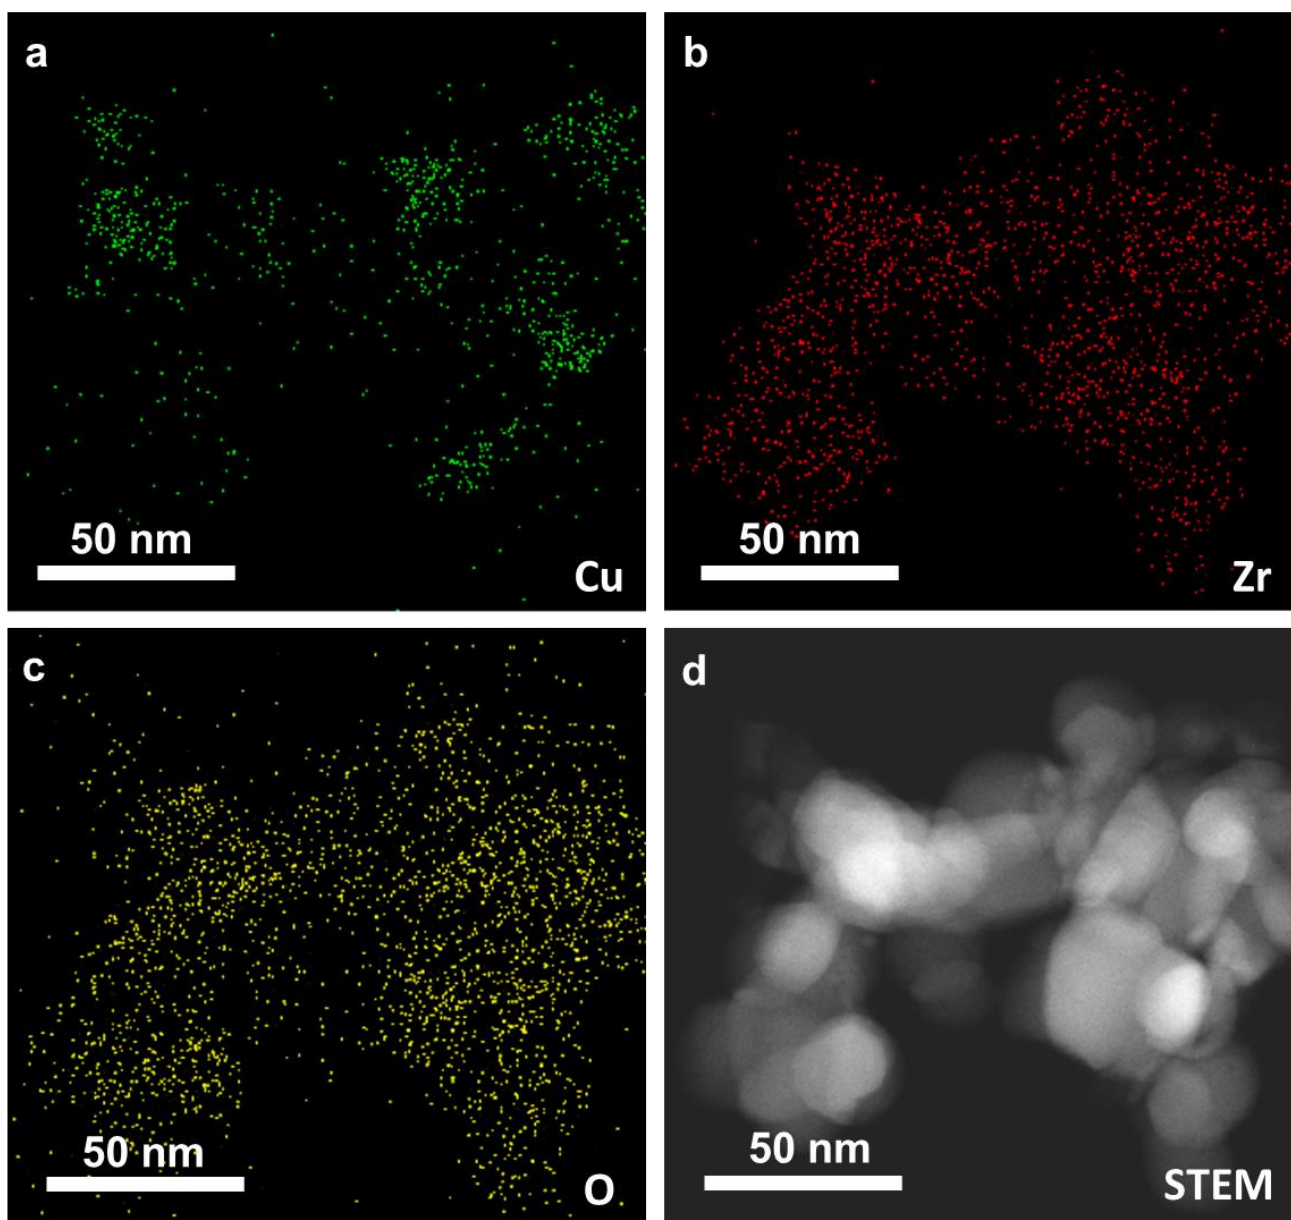

**Figure S15.** Morphological characterization of 25Cu/ZrO<sub>2</sub> sample by STEM-EDS mapping. In these images, Cu nanoparticles as well as highly dispersed Cu species on ZrO<sub>2</sub> can be observed.



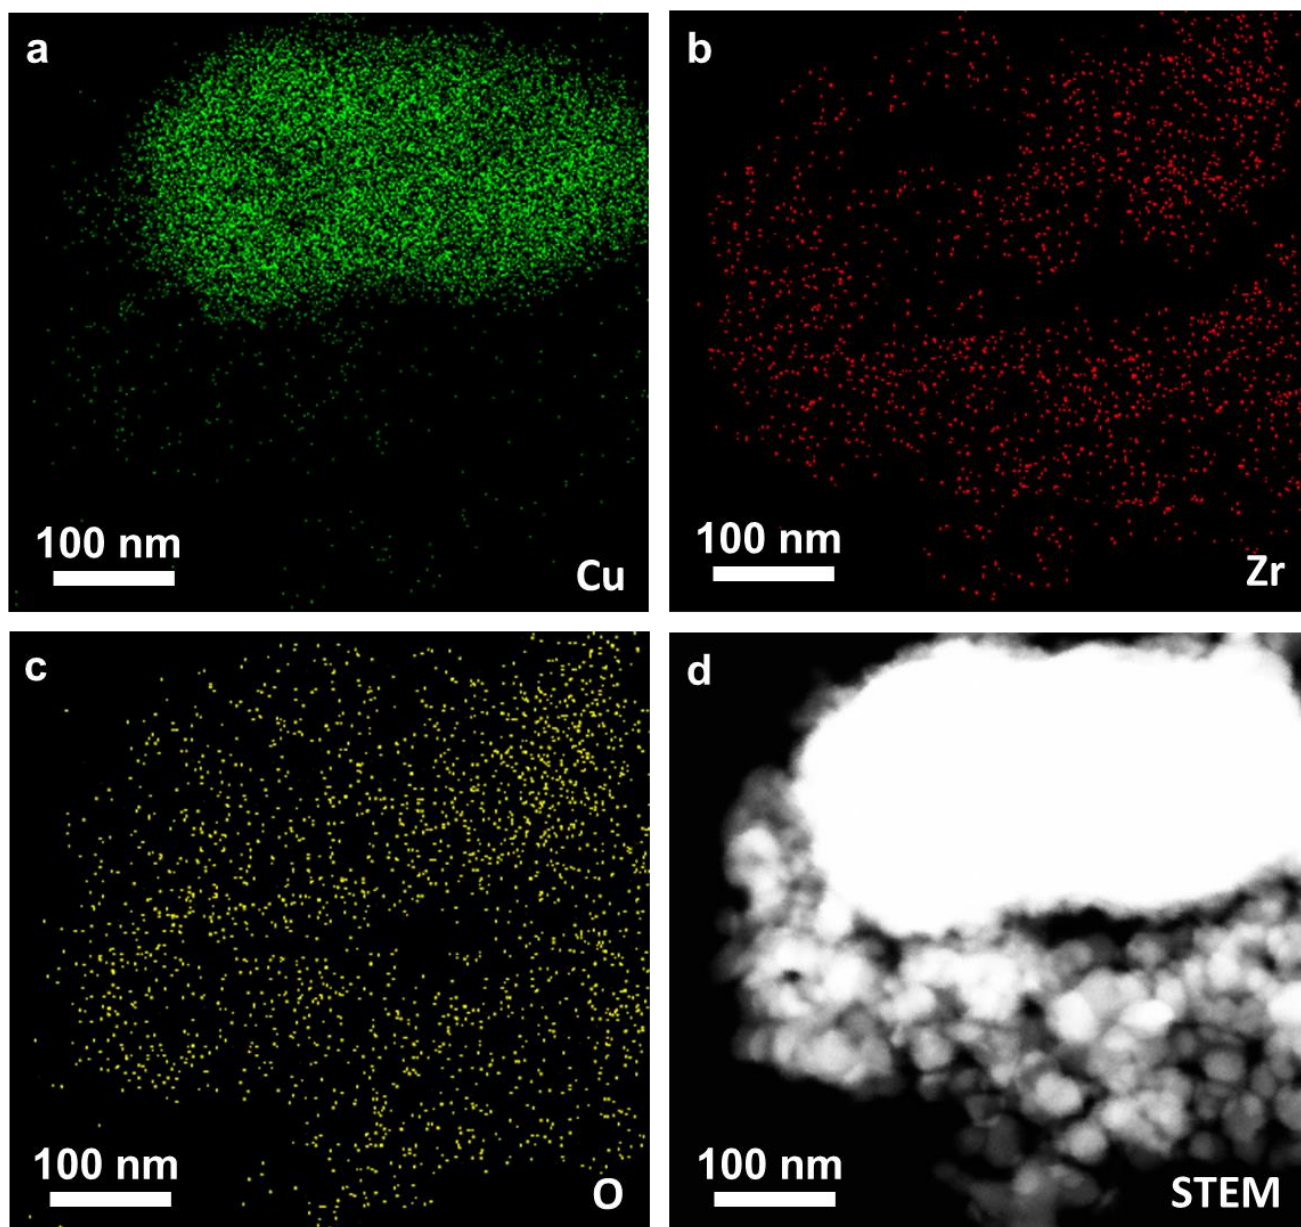

**Figure S16.** Morphological characterization of 25Cu/ZrO<sub>2</sub> sample by STEM-EDS mapping. In these images, Cu nanoparticles as well as highly dispersed Cu species on ZrO<sub>2</sub> can be observed.

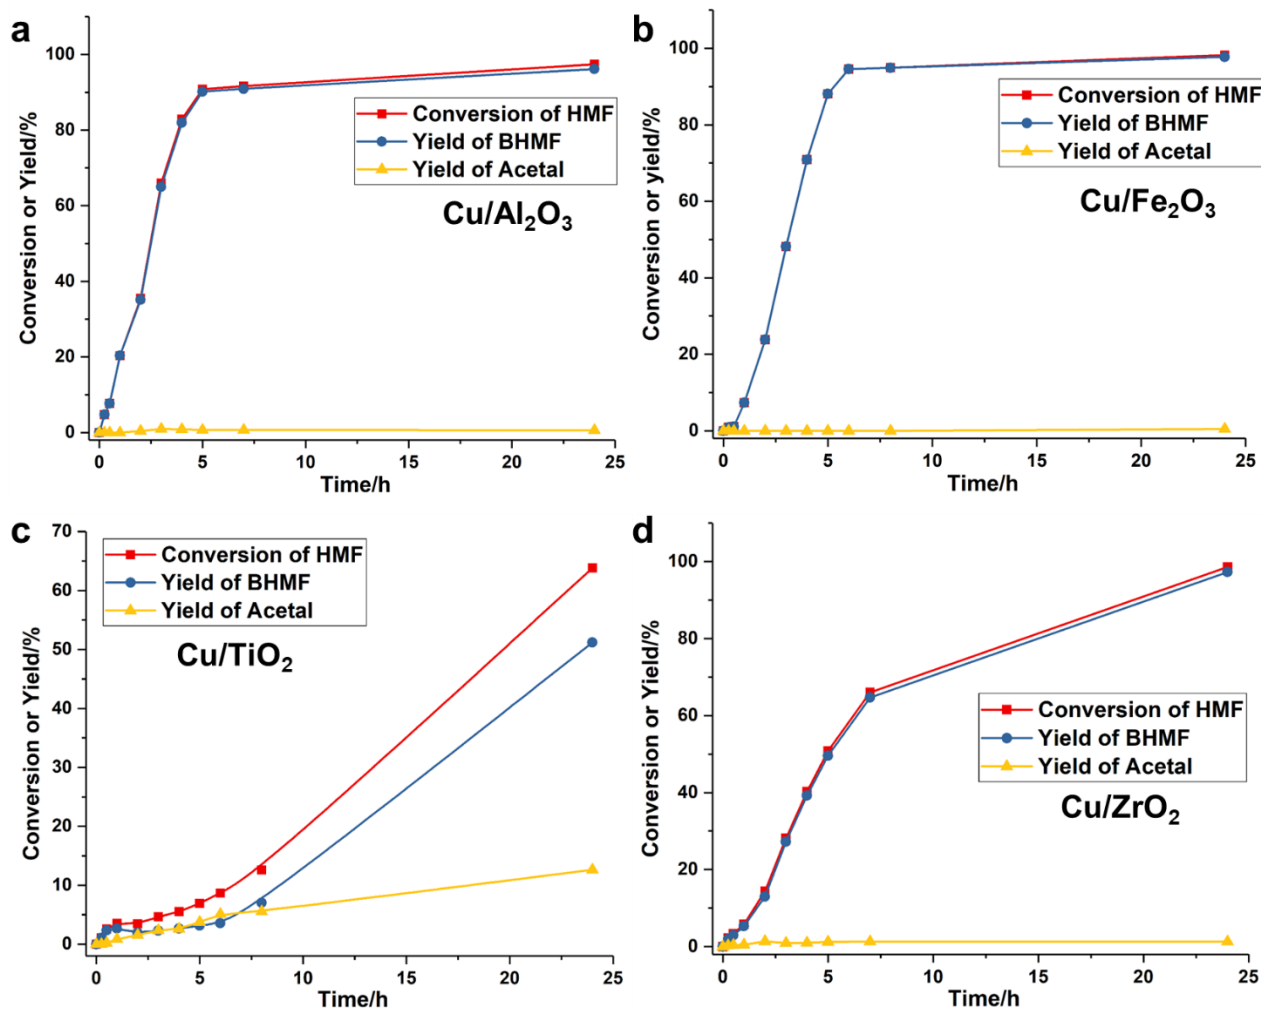

**Figure S17.** Catalytic performance of Cu catalysts supported on conventional solid carriers for hydrogenation of HMF. (a) 25Cu/Al<sub>2</sub>O<sub>3</sub>, (b) 25Cu/Fe<sub>2</sub>O<sub>3</sub>, (c) 25Cu/TiO<sub>2</sub> and (d) 25Cu/ZrO<sub>2</sub>. Reaction conditions: 10 mg solid catalyst, 0.5 mmol HMF, 5 mL methanol as solvent, 110 °C and 10 bar of H<sub>2</sub>.

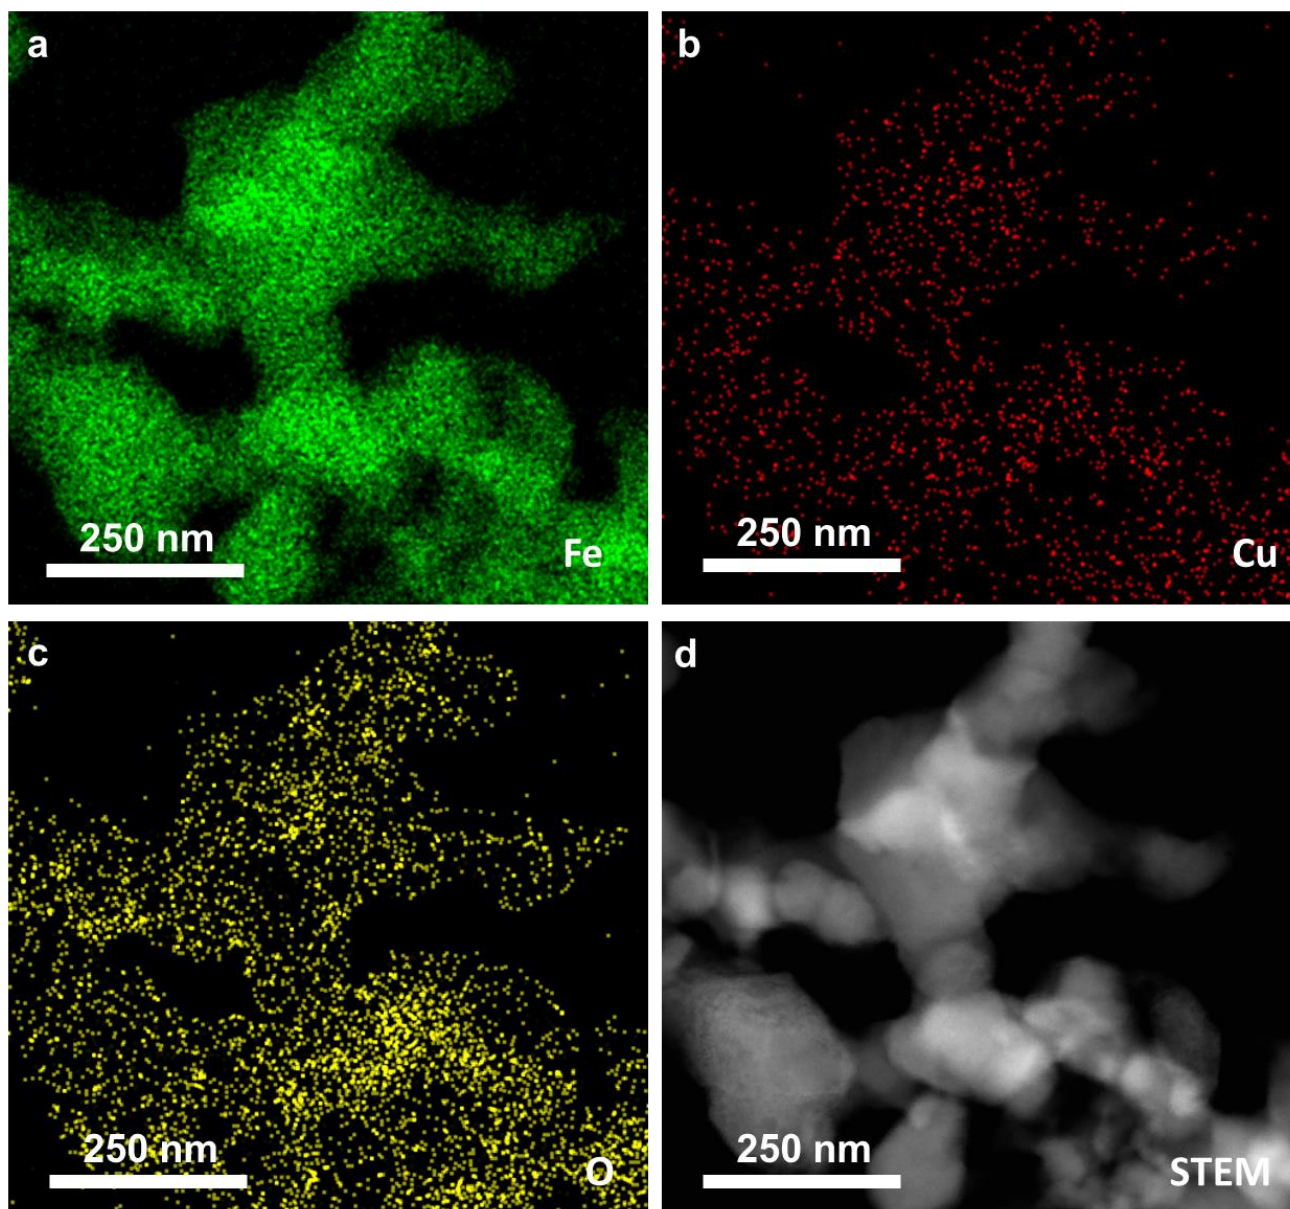

**Figure S18.** Morphological characterization of 5Cu/Fe@C sample by STEM-EDS mapping with 5 wt% of Cu. In these images, Cu nanoparticles as well as highly dispersed Cu species on Fe@C nanoparticles can be observed.

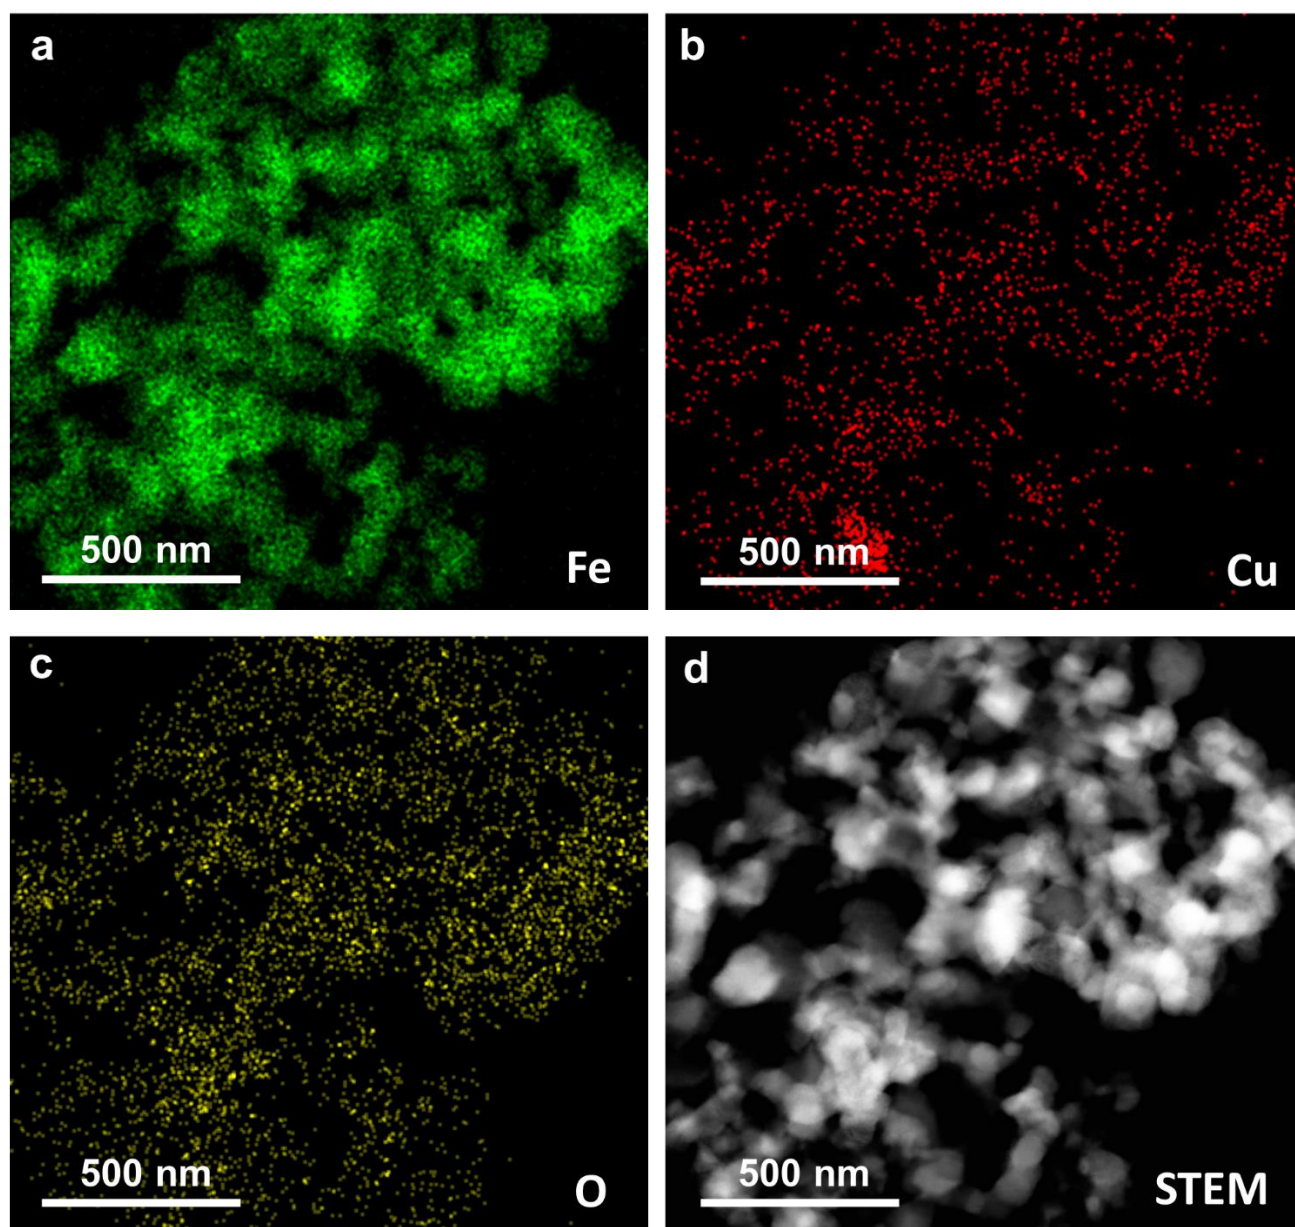

**Figure S19.** Morphological characterization of 5Cu/Fe@C sample by STEM-EDS mapping with 5 wt% of Cu. In these images, Cu nanoparticles as well as highly dispersed Cu species on Fe@C nanoparticles can be observed.

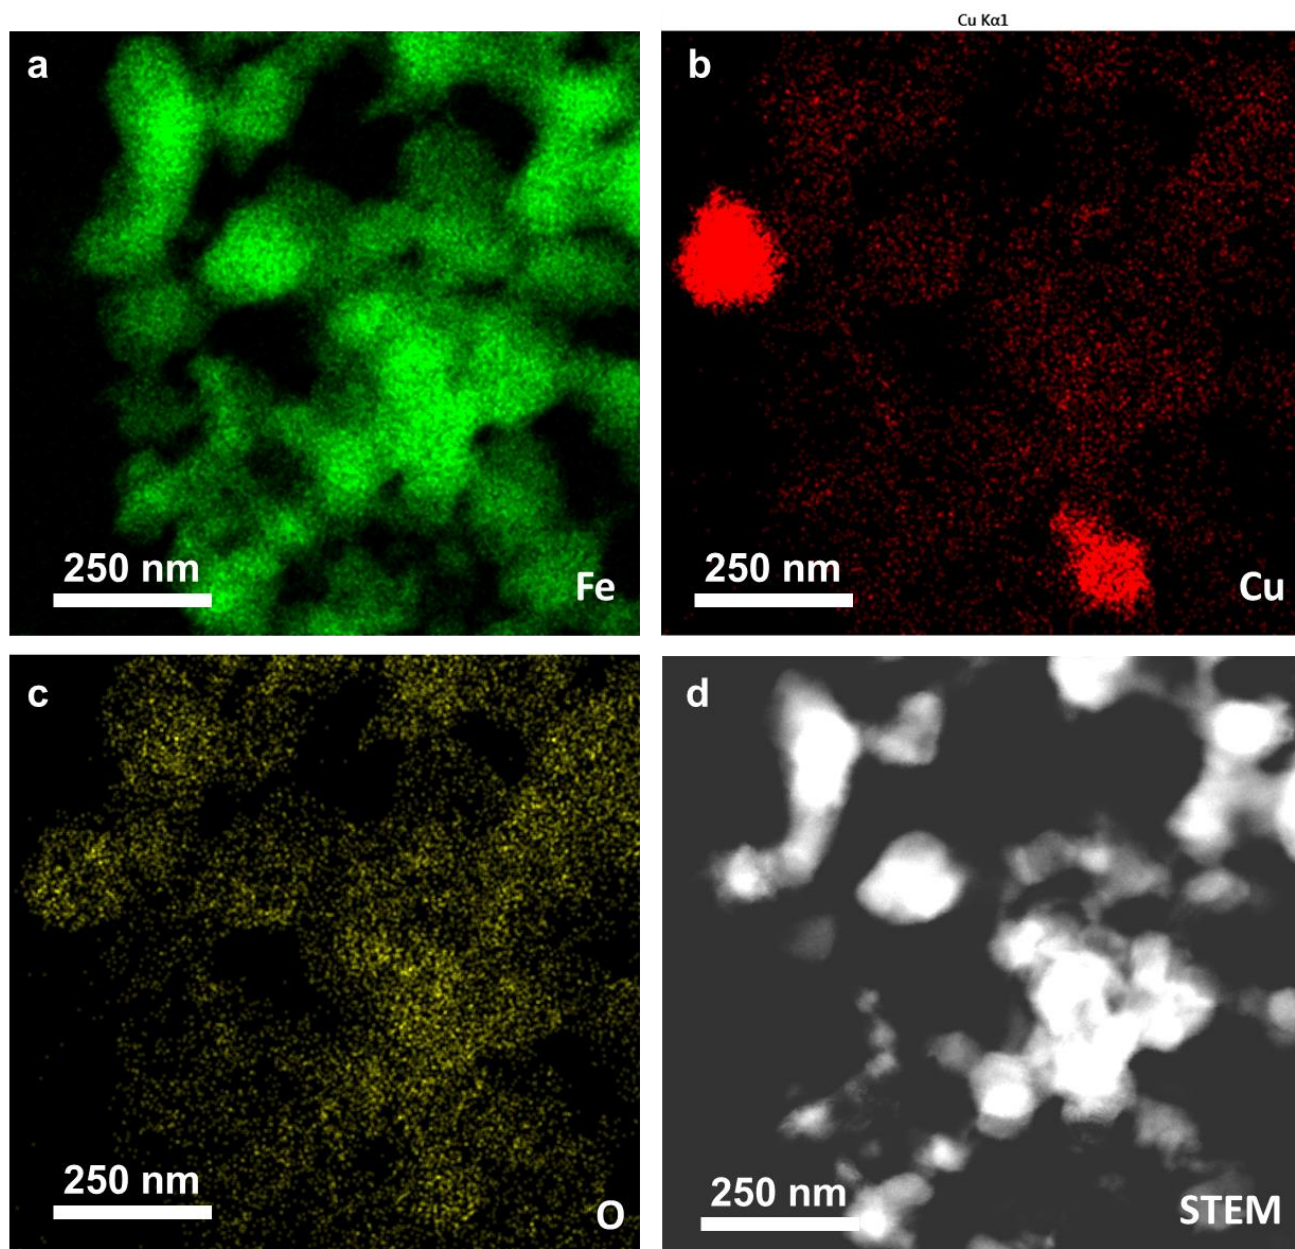

**Figure S20.** Morphological characterization of 5Cu/Fe@C sample by STEM-EDS mapping with 5 wt% of Cu. In these images, Cu nanoparticles as well as highly dispersed Cu species on Fe@C nanoparticles can be observed.

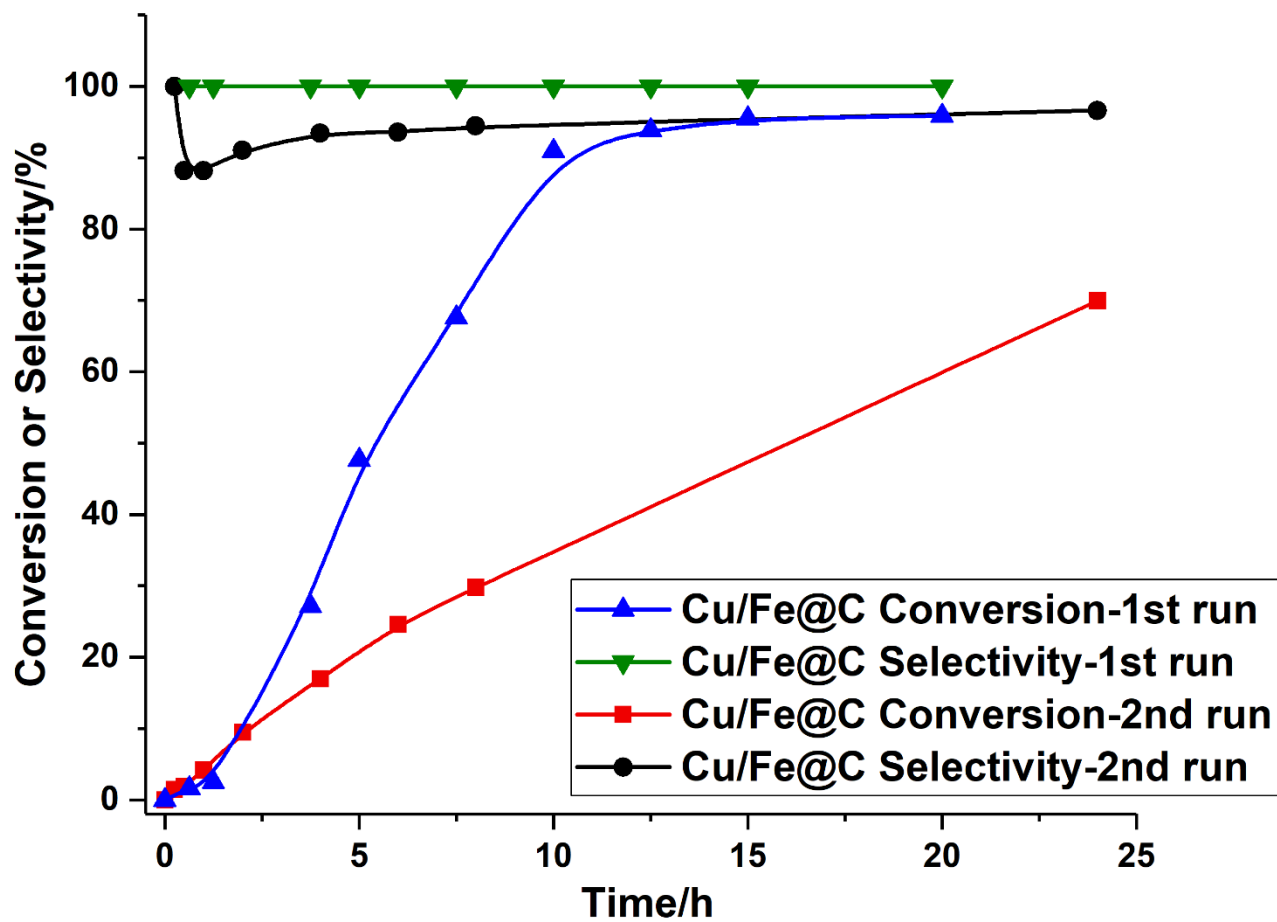

Figure S21. Stability test of Cu/Fe@C sample for hydrogenation of HMF.

**Table S1.** Chemical compositions of various CuFe bimetallic catalysts, determined by ICP.

| <b>Sample</b>                         | <b>Mole percentage of Fe</b> | <b>Mole percentage of Cu</b> |
|---------------------------------------|------------------------------|------------------------------|
| Fe <sub>0.92</sub> Cu <sub>0.08</sub> | 0.92                         | 0.08                         |
| Fe <sub>0.88</sub> Cu <sub>0.12</sub> | 0.88                         | 0.12                         |
| Fe <sub>0.76</sub> Cu <sub>0.24</sub> | 0.76                         | 0.24                         |
| Fe <sub>0.50</sub> Cu <sub>0.50</sub> | 0.50                         | 0.50                         |
| Fe <sub>0.25</sub> Cu <sub>0.75</sub> | 0.25                         | 0.75                         |

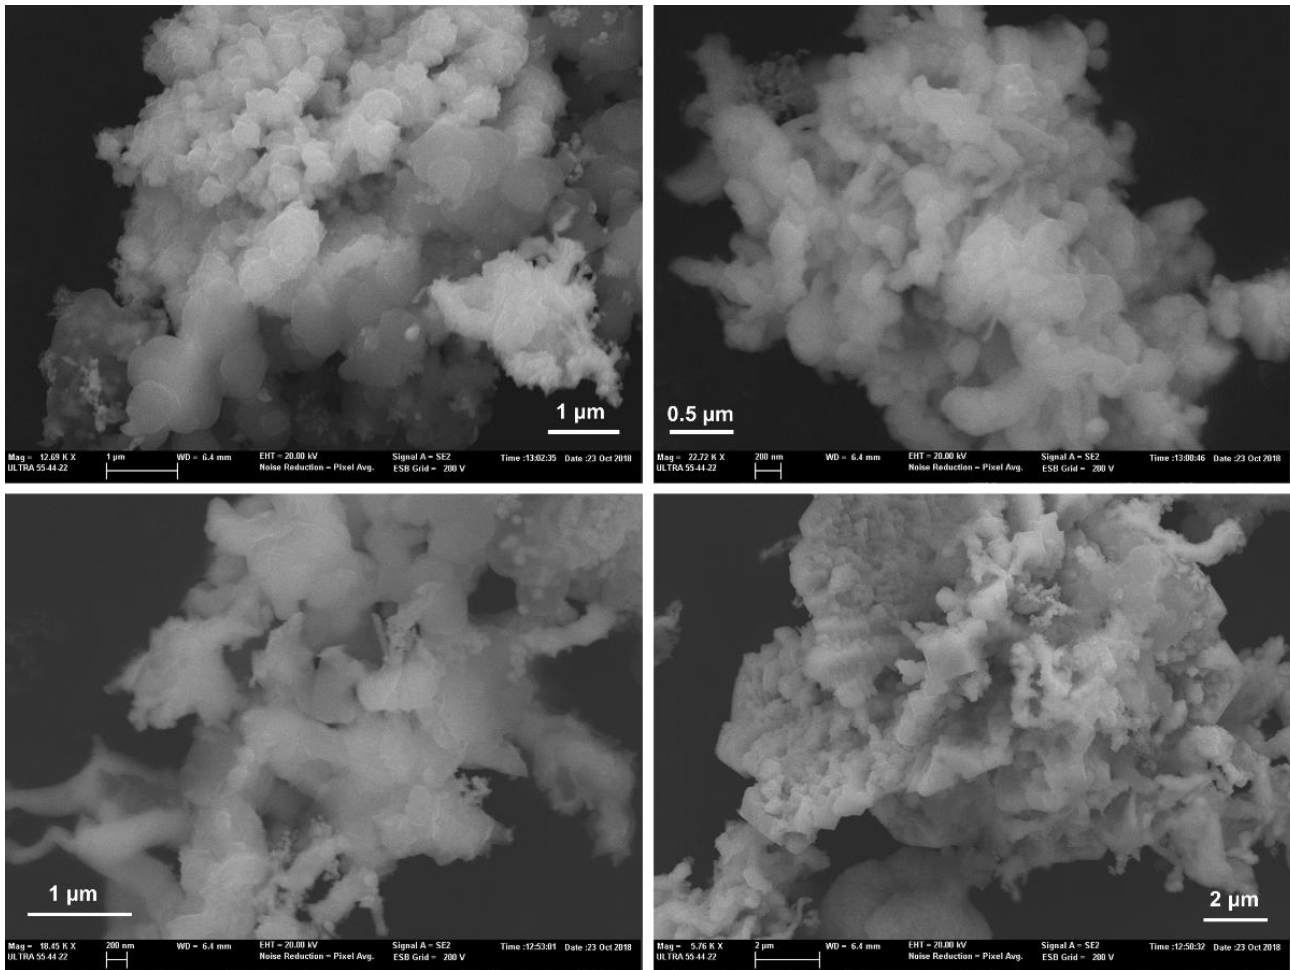

**Figure S22.** FESEM images of Cu@C sample. Cu nanoparticles of 50-500 nm can be observed.



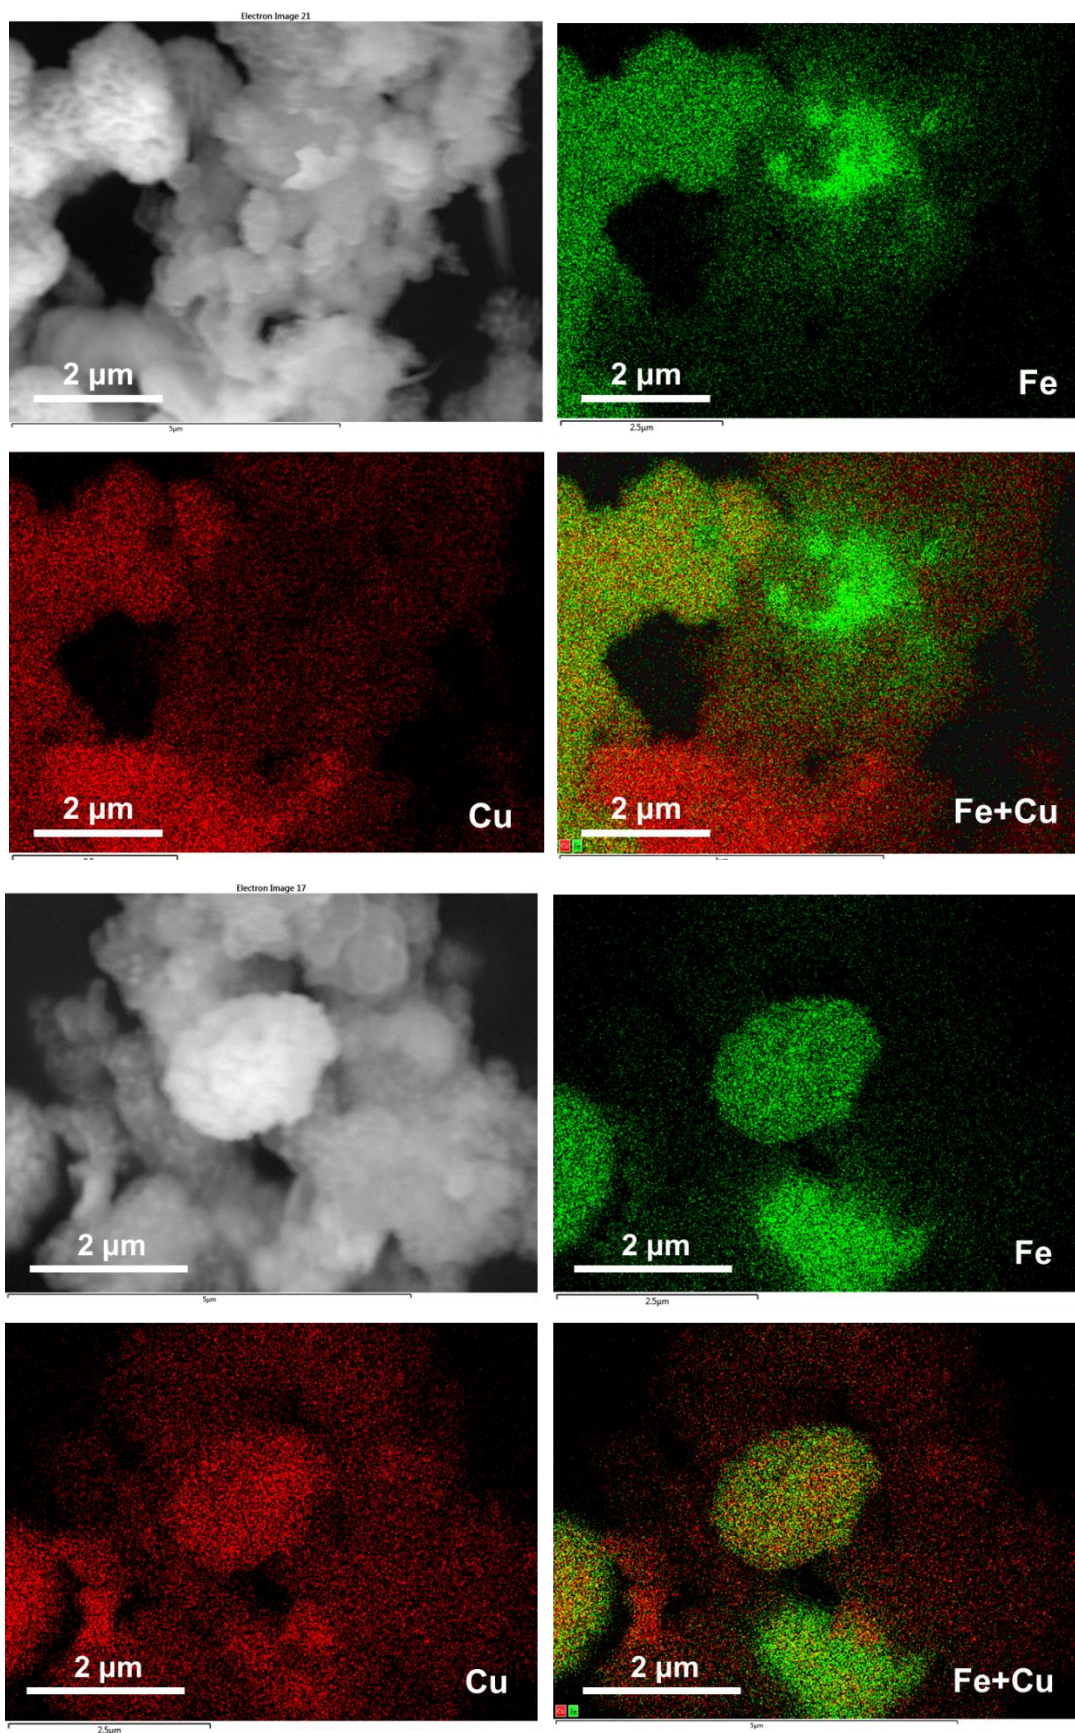

**Figure S23.** FESEM-EDS mapping of  $\text{Cu}_{0.75}\text{Fe}_{0.25}@C$  sample in two different areas.

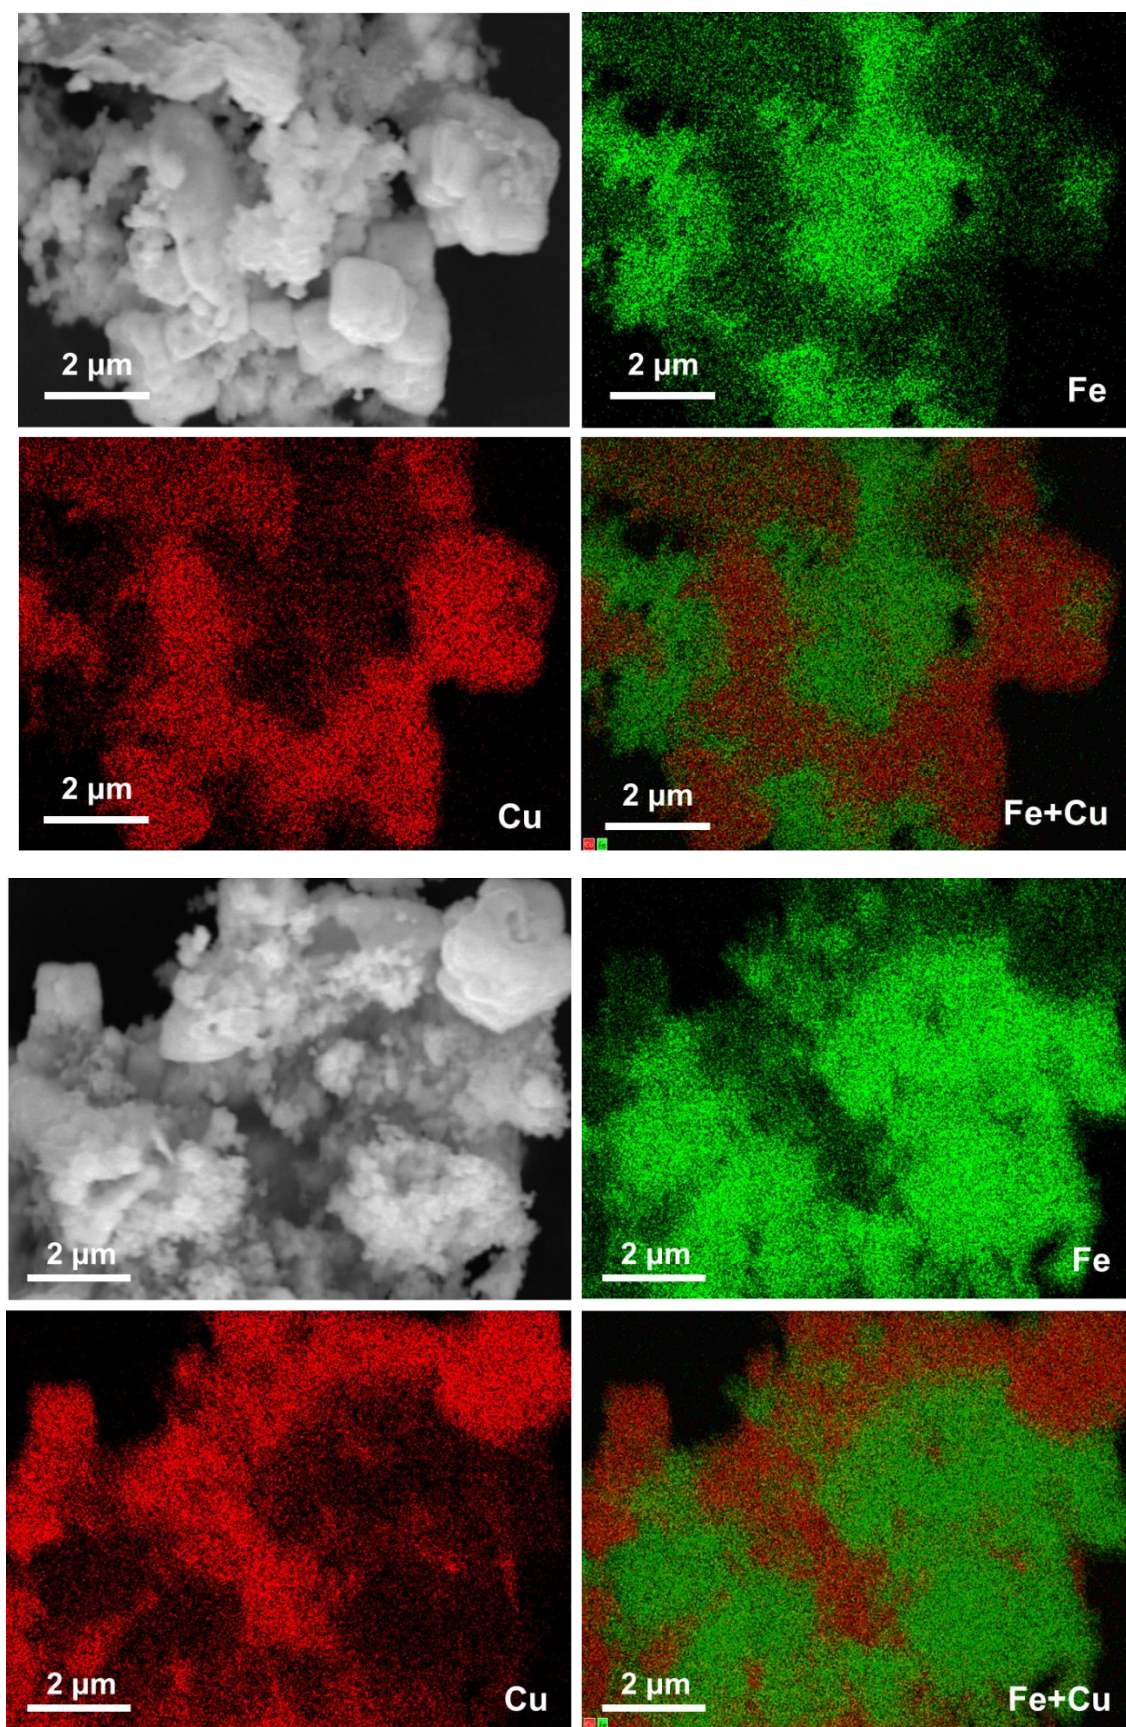

**Figure S24.** FESEM-EDS mapping of  $\text{Cu}_{0.50}\text{Fe}_{0.50}@C$  sample in two different areas.

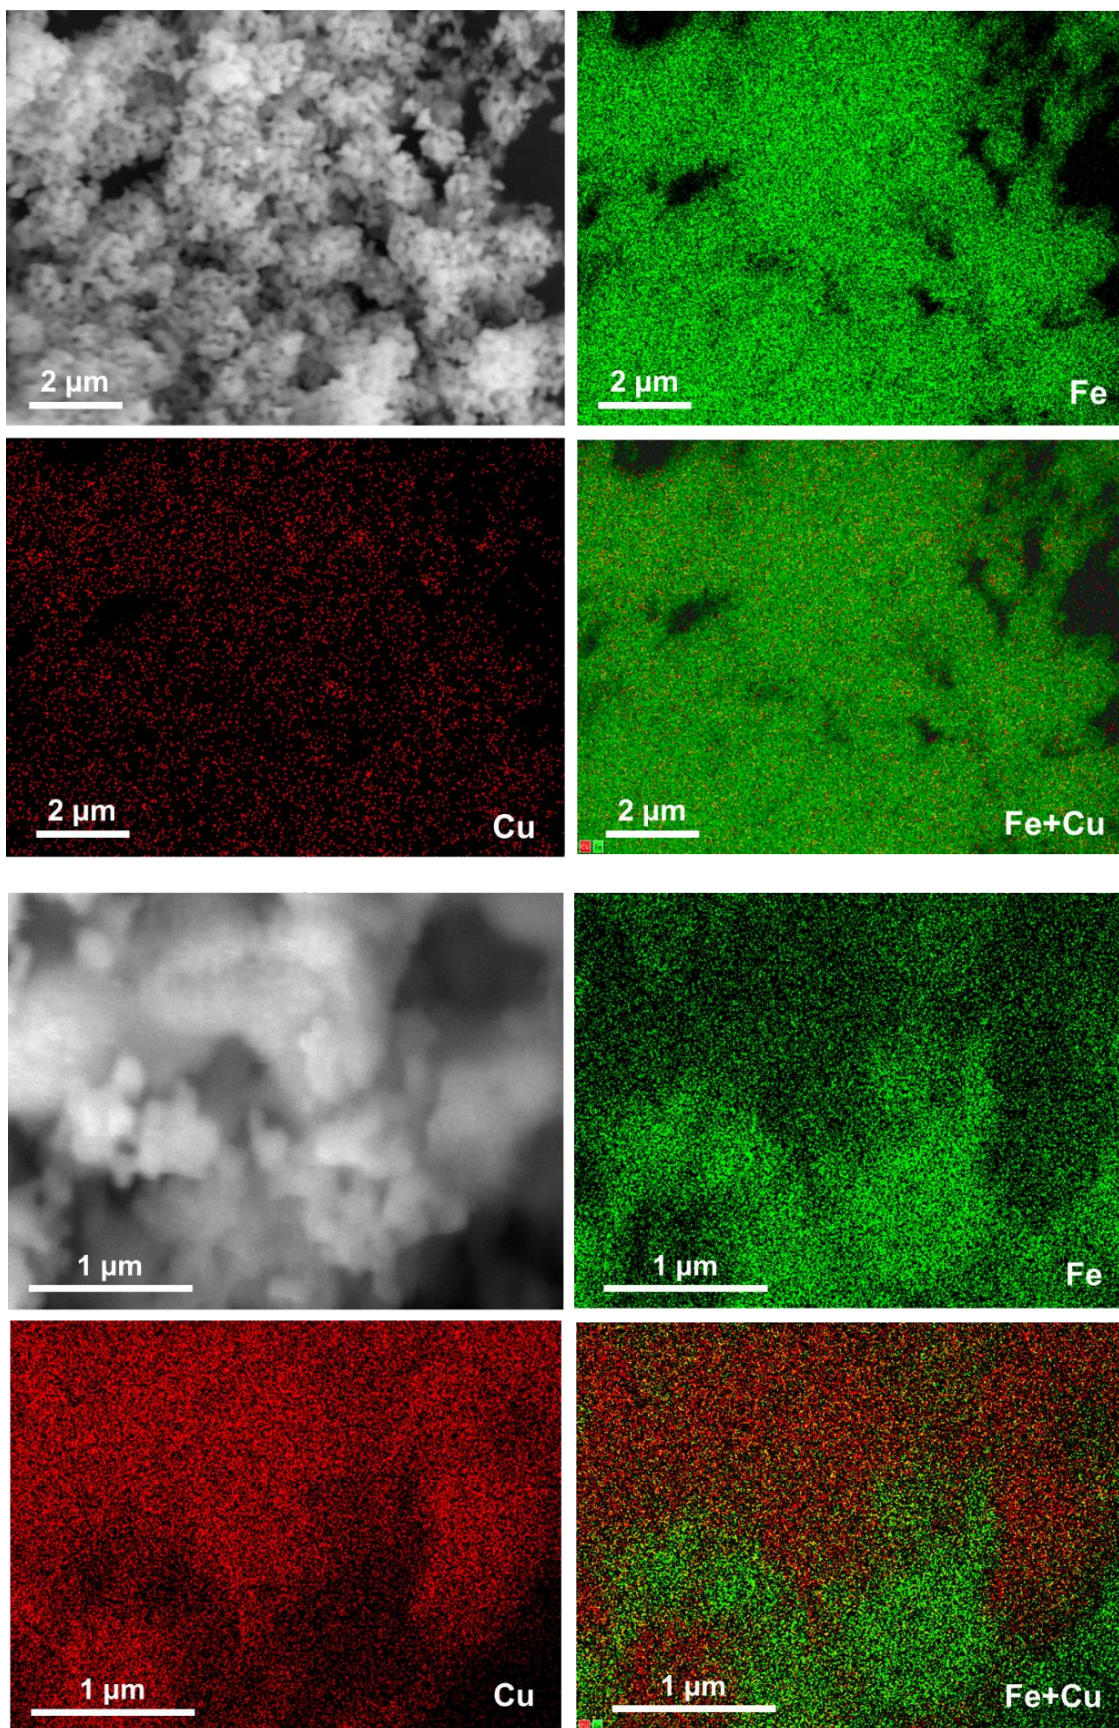

**Figure S25.** FESEM-EDS mapping of  $\text{Cu}_{0.24}\text{Fe}_{0.76}\text{@C}$  sample in two different areas.

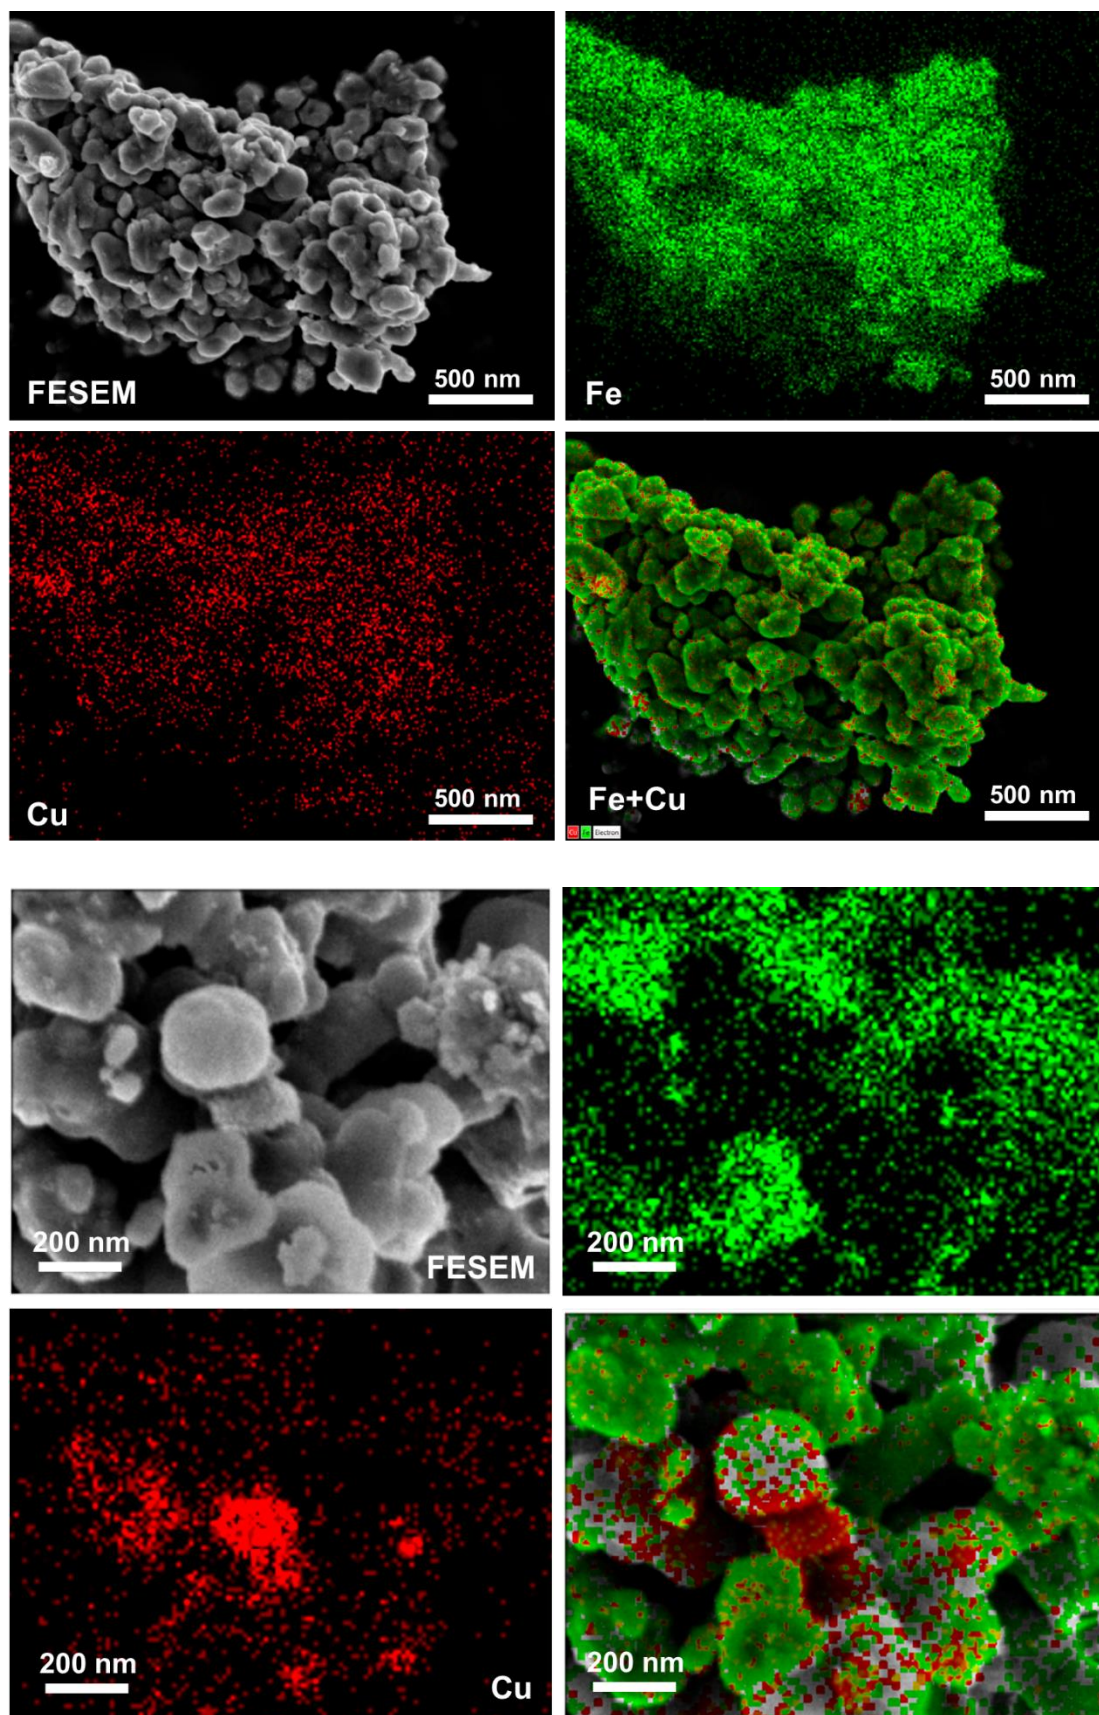

**Figure S26.** FESEM-EDS mapping of  $\text{Cu}_{0.12}\text{Fe}_{0.88}@C$  sample in two different areas.

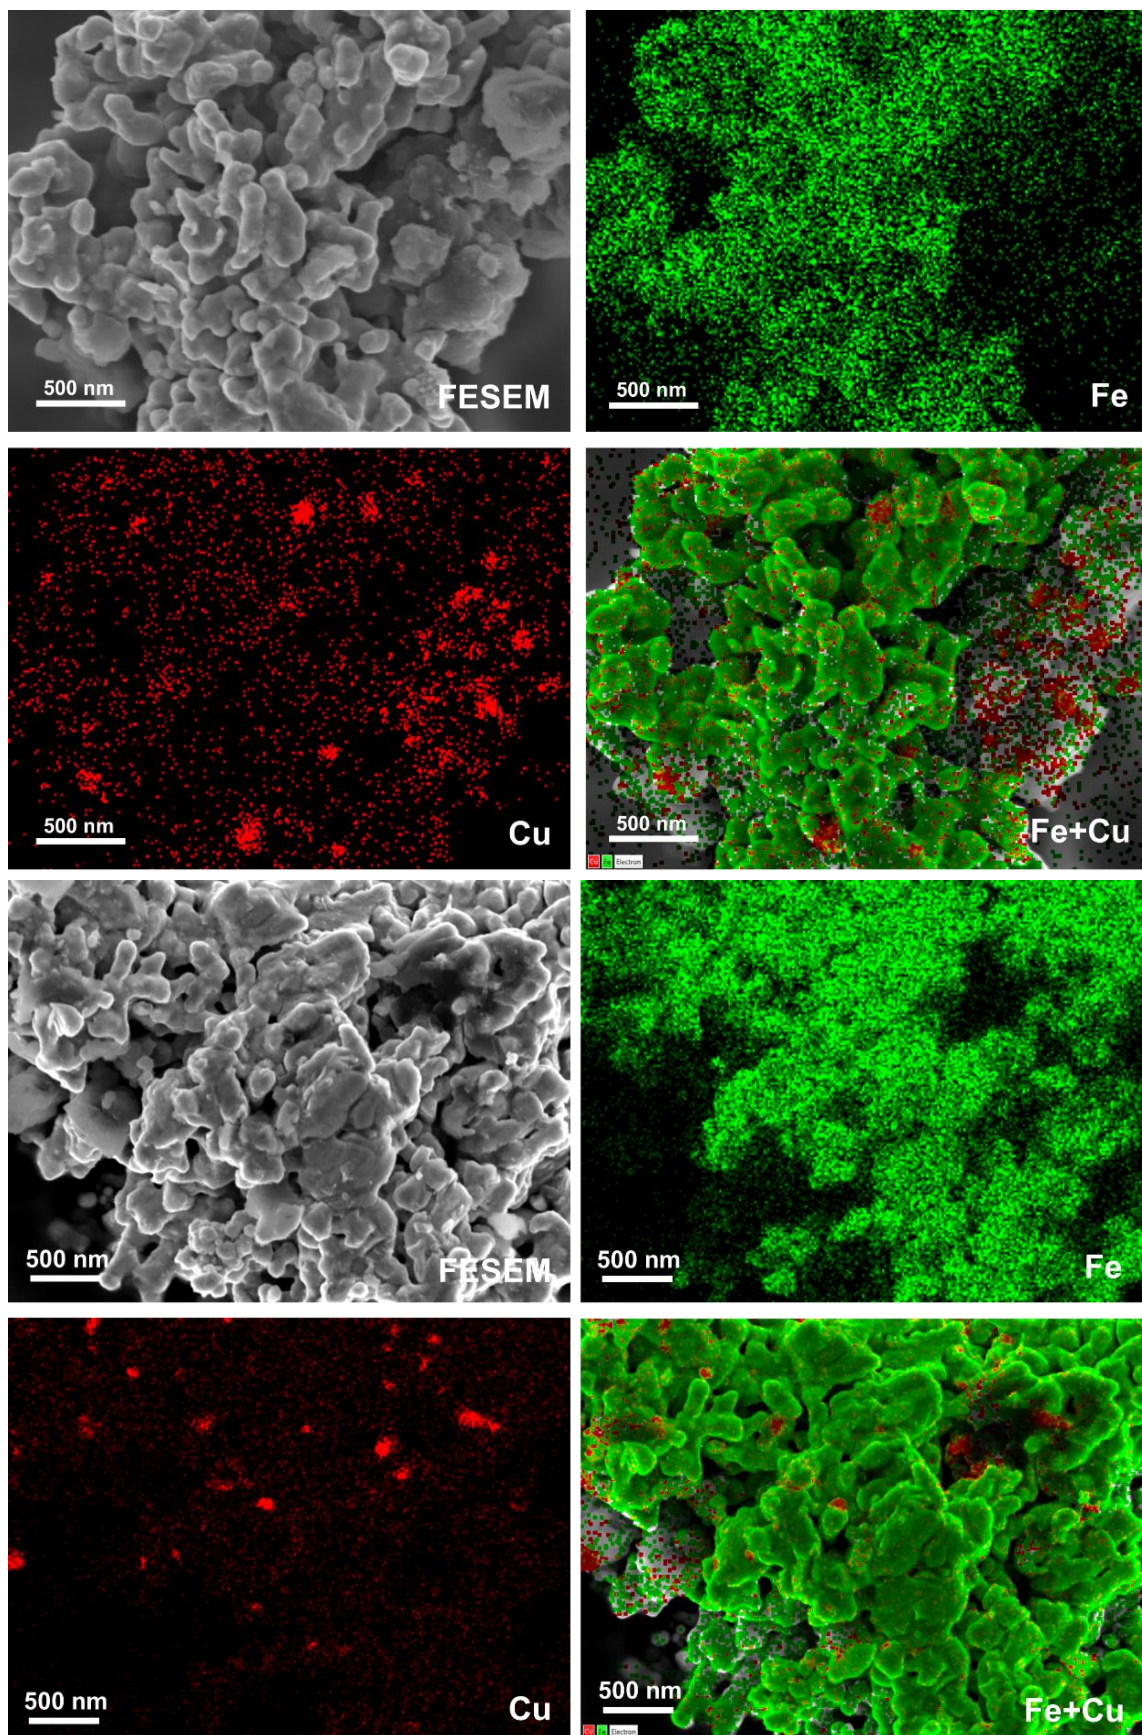

**Figure S27.** FESEM-EDS mapping of  $\text{Cu}_{0.08}\text{Fe}_{0.92}@C$  sample in two different areas.

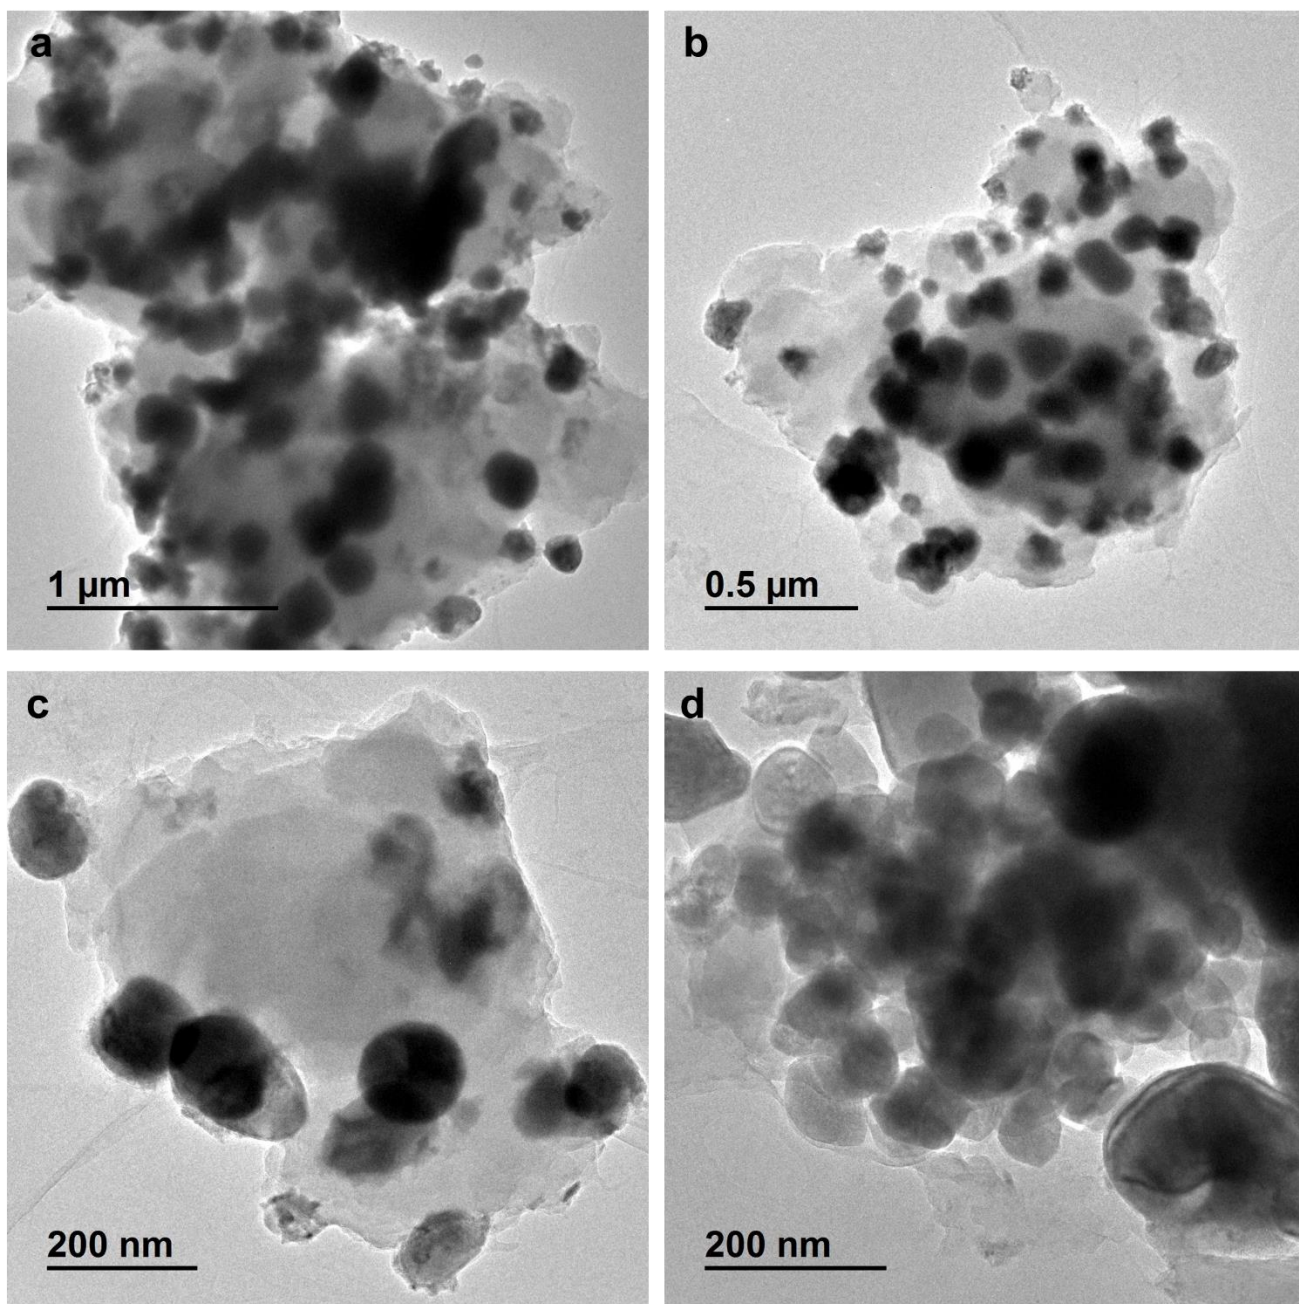

**Figure S28.** Low-magnification TEM images of  $\text{Cu}_{0.08}\text{Fe}_{0.92}@C$  sample.

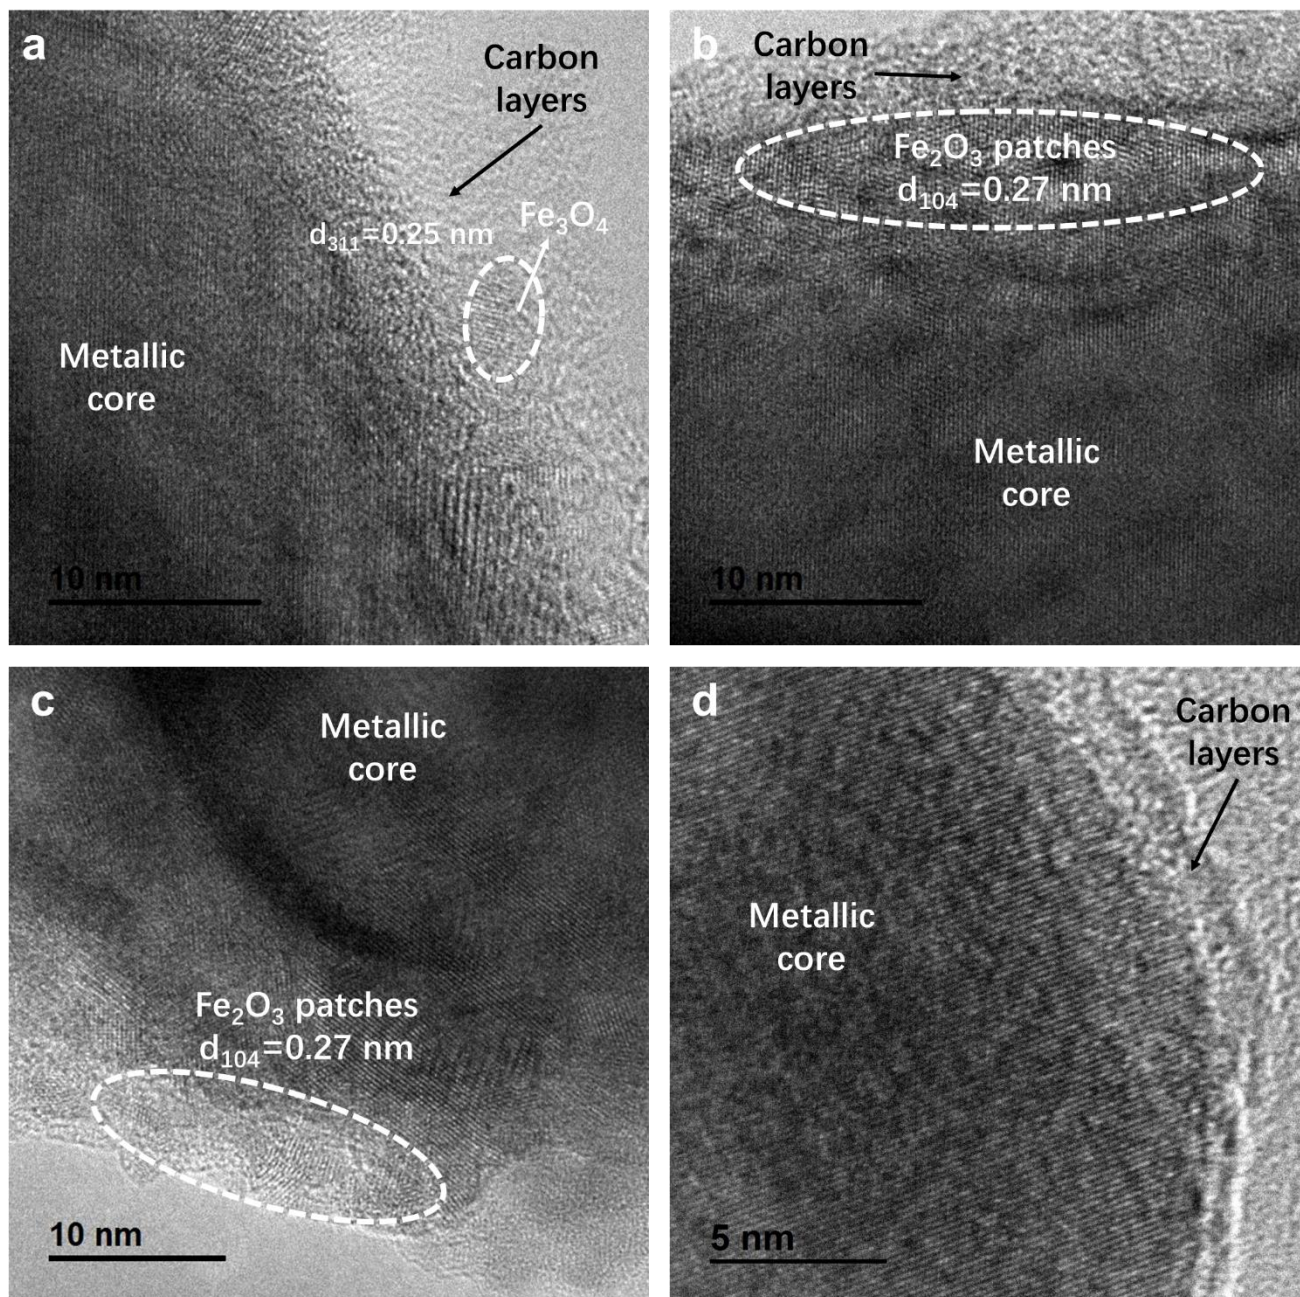

**Figure S29.** High-magnification TEM images of  $\text{Cu}_{0.08}\text{Fe}_{0.92}@C$  sample.

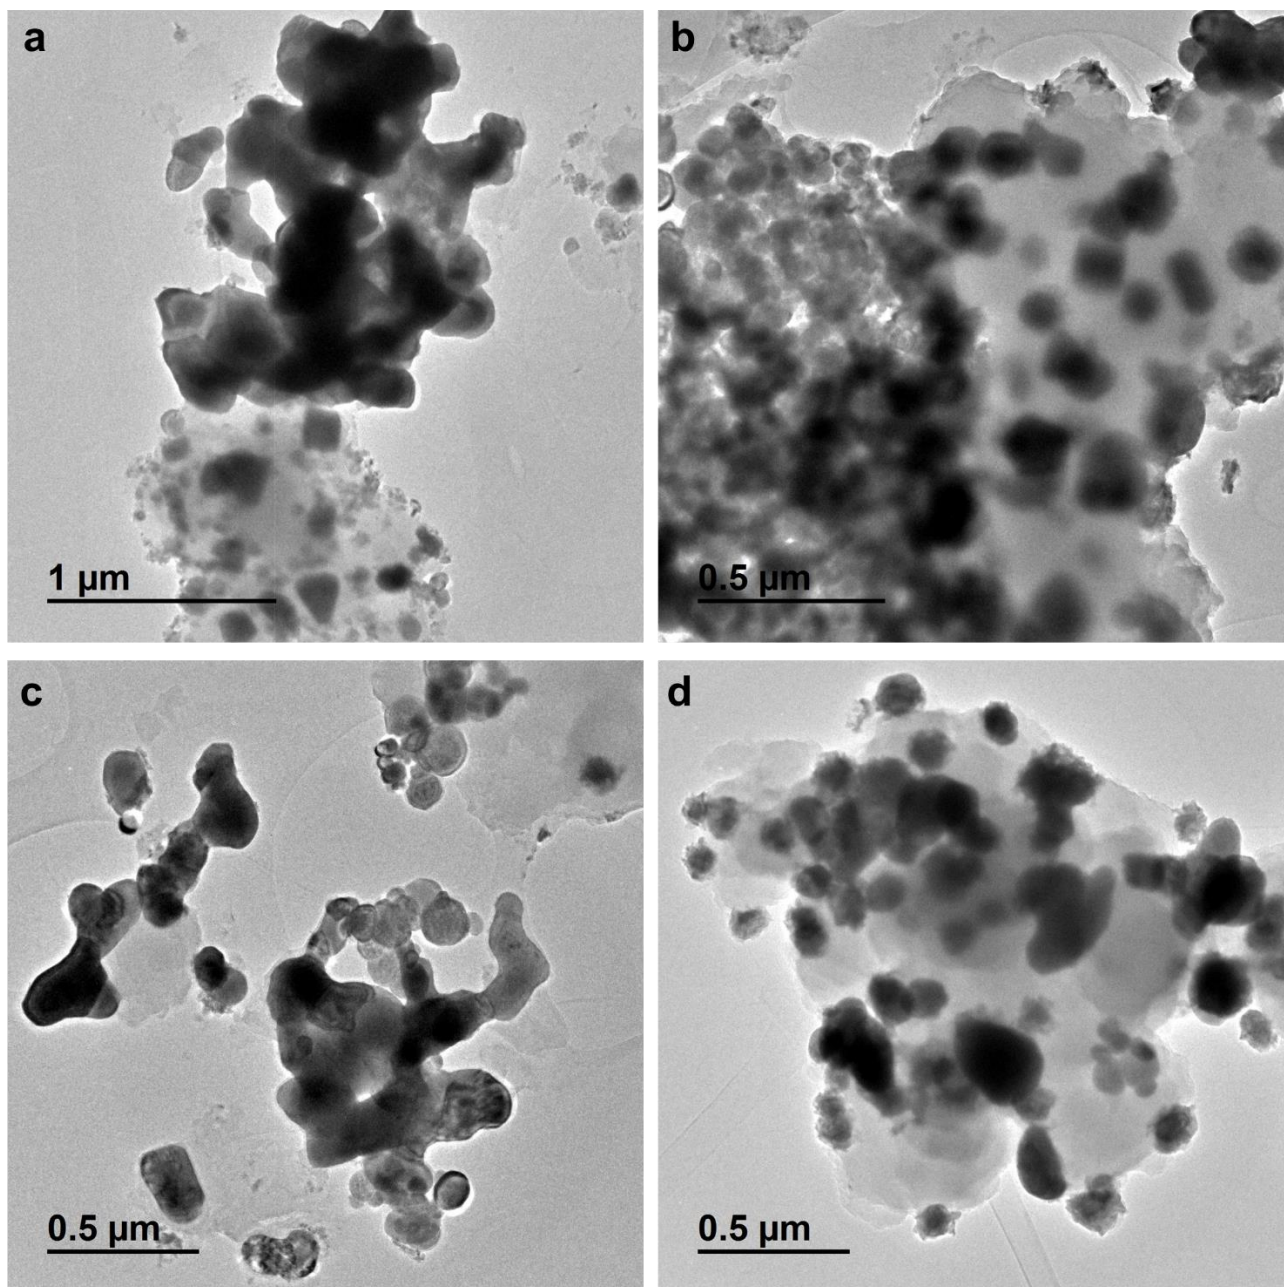

**Figure S30.** Low-magnification TEM images of  $\text{Cu}_{0.12}\text{Fe}_{0.88}@C$  sample.



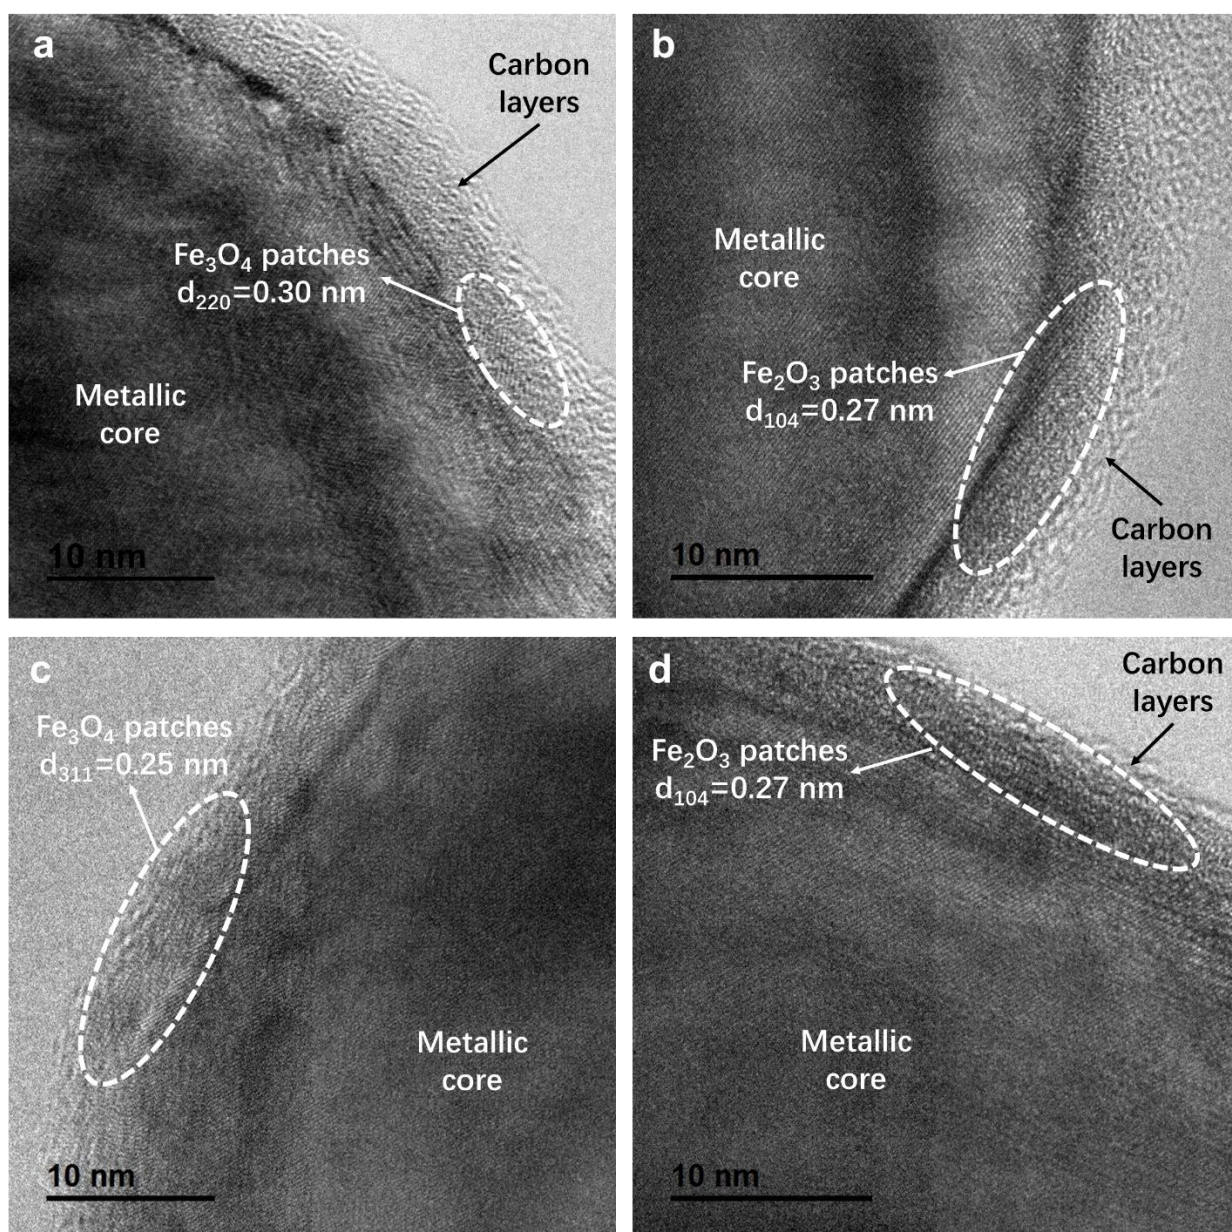

Figure S31. High-resolution TEM images of  $\text{Cu}_{0.12}\text{Fe}_{0.88}@C$  sample.

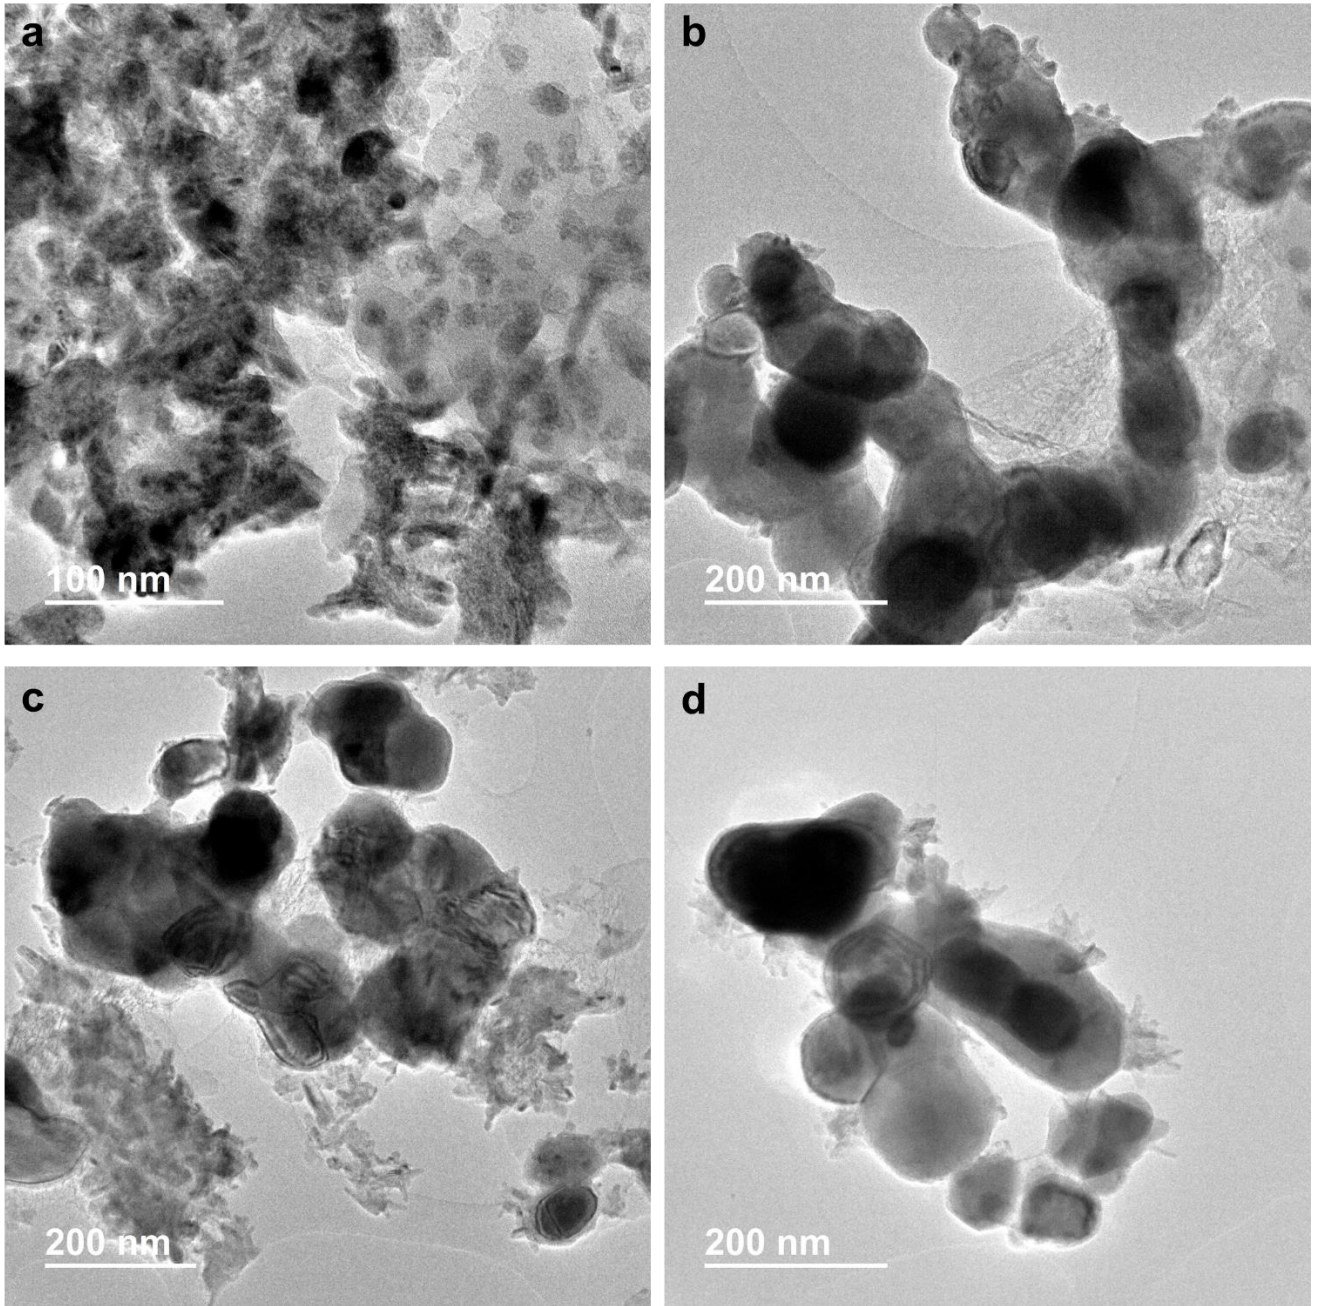

Figure S32. Low-magnification TEM images of  $\text{Cu}_{0.24}\text{Fe}_{0.76}@C$  sample.

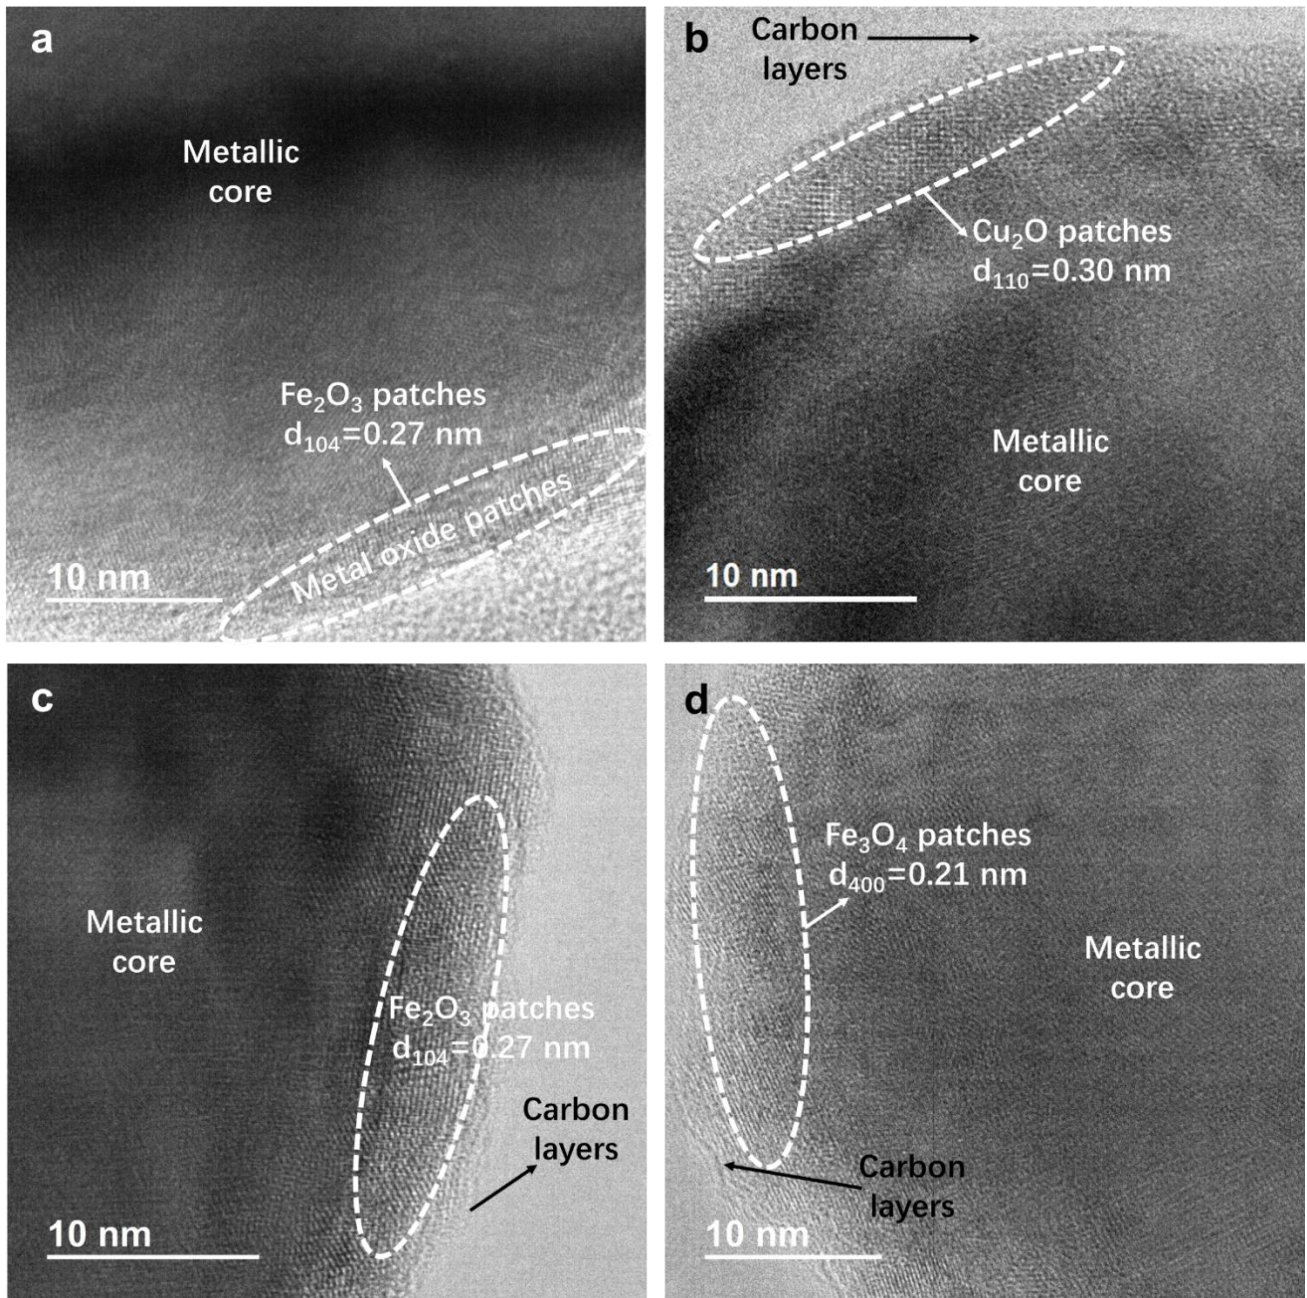

Figure S33. High-resolution TEM images of  $\text{Cu}_{0.24}\text{Fe}_{0.76}@C$  sample.

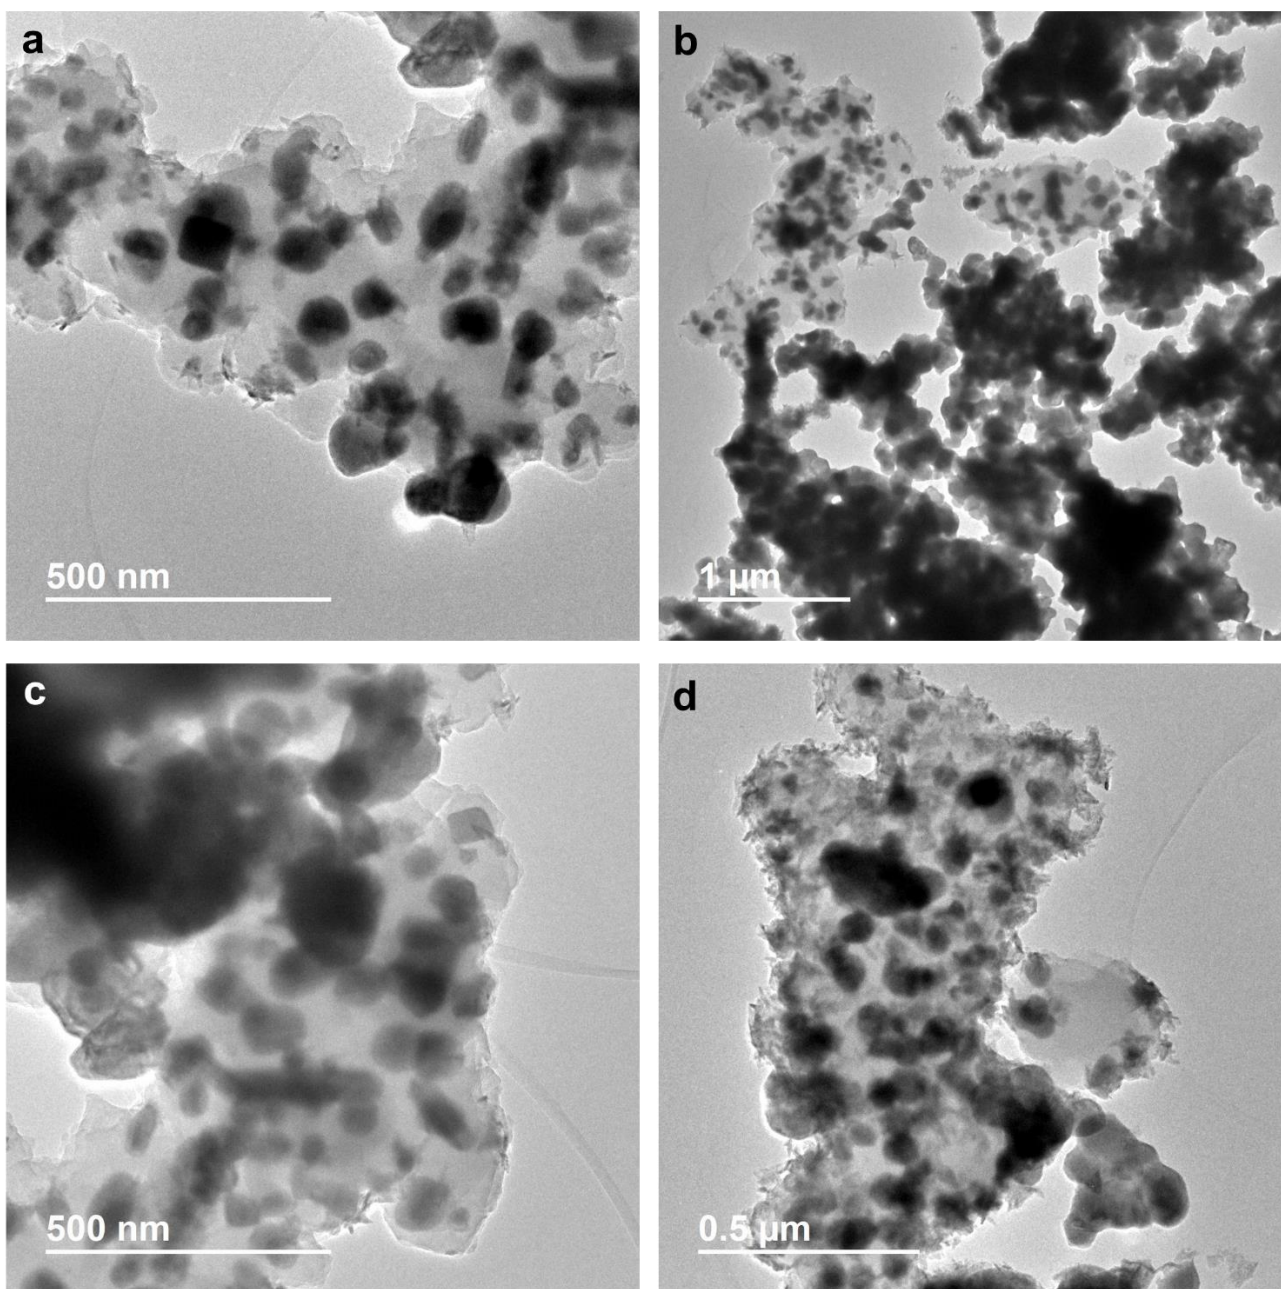

Figure S34. Low-magnification TEM images of  $\text{Cu}_{0.5}\text{Fe}_{0.5}@C$  sample.

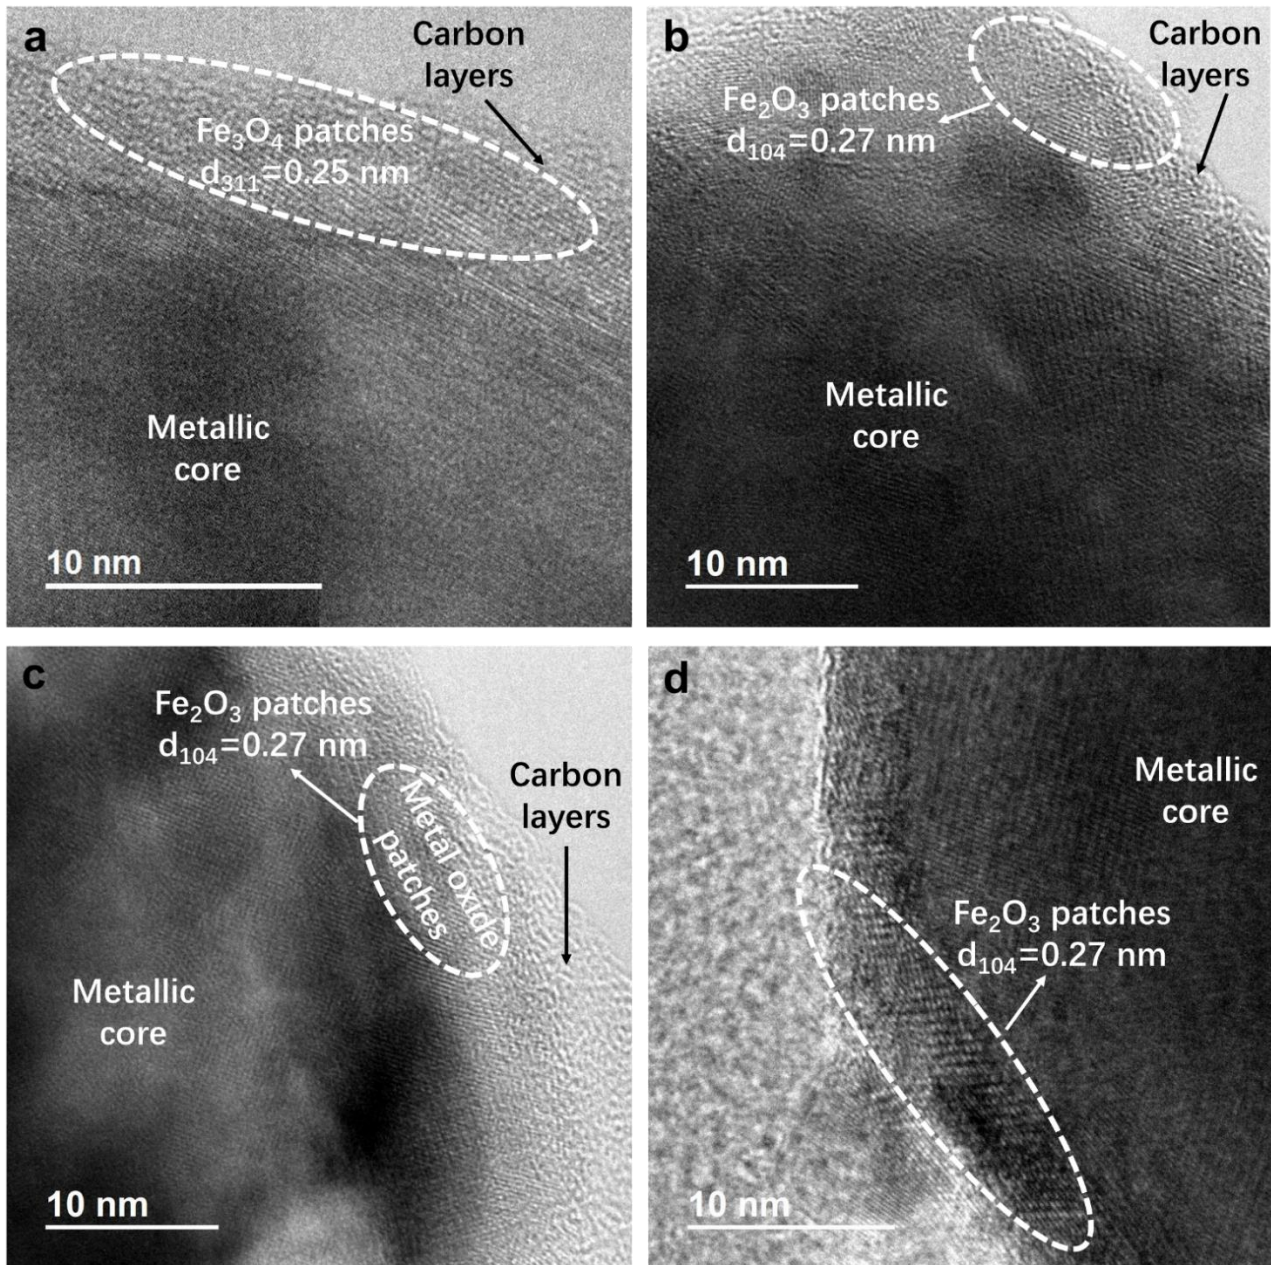

Figure S35. High-resolution TEM images of  $\text{Cu}_{0.50}\text{Fe}_{0.50}@C$  sample.

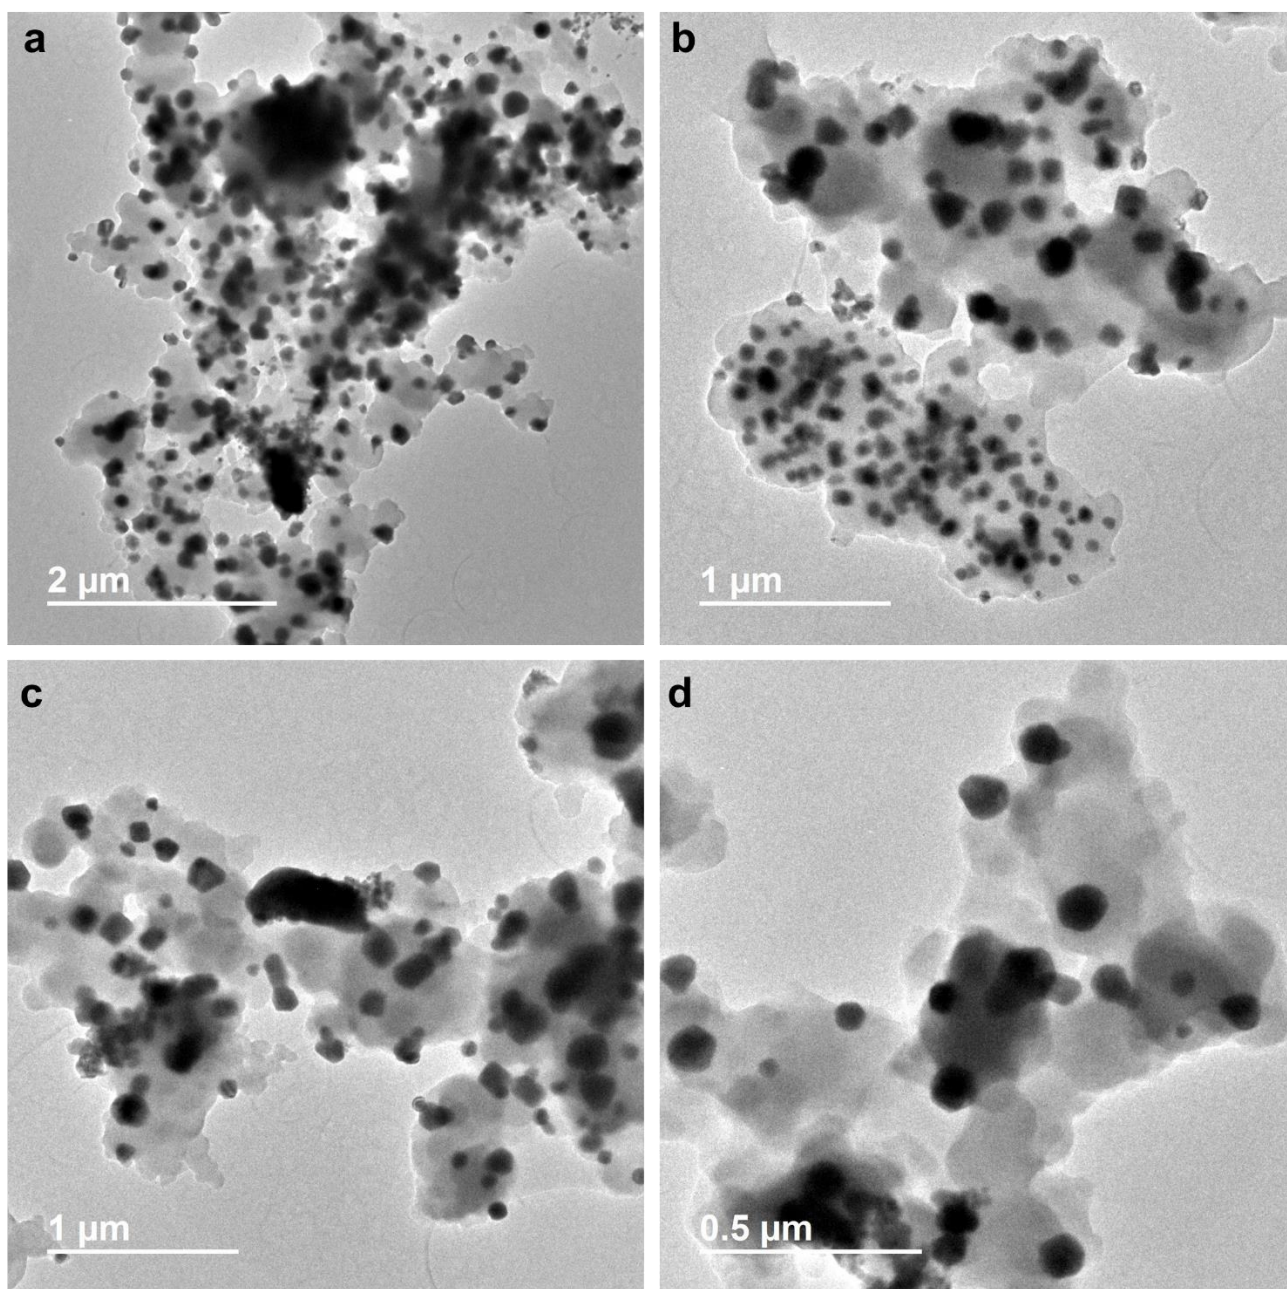

Figure S36. Low-magnification TEM images of  $\text{Cu}_{0.75}\text{Fe}_{0.25}@C$  sample.

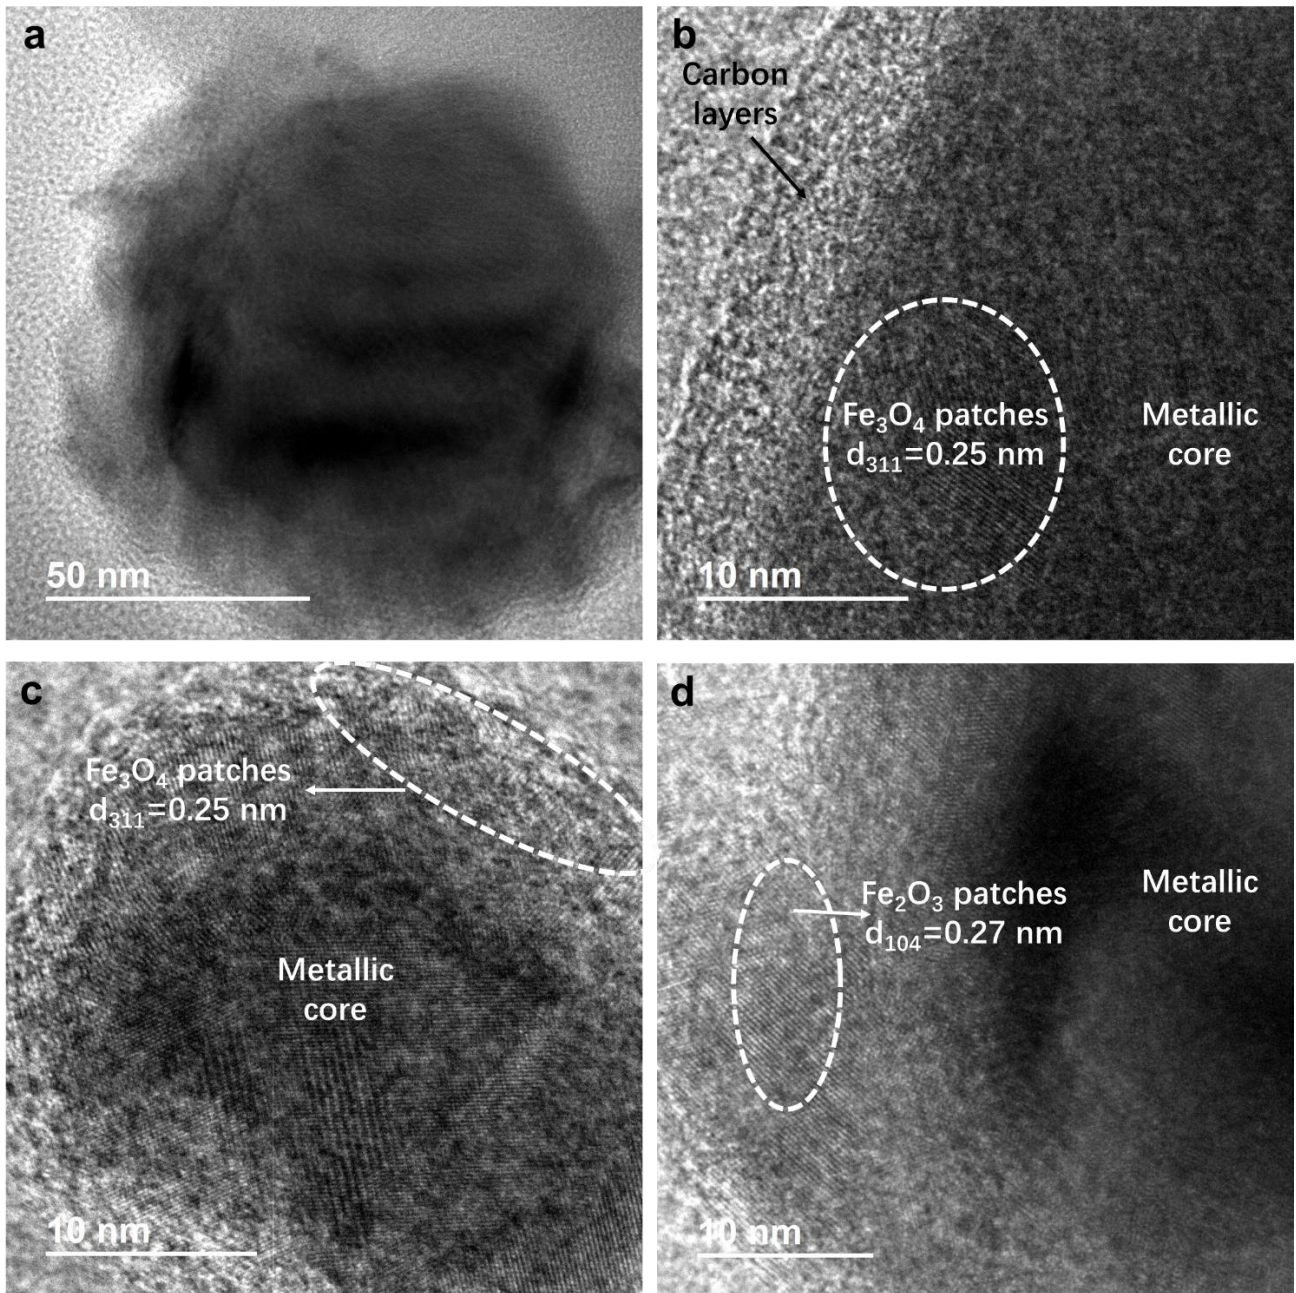

Figure S37. High-resolution TEM images of  $\text{Cu}_{0.75}\text{Fe}_{0.25}@C$  sample.

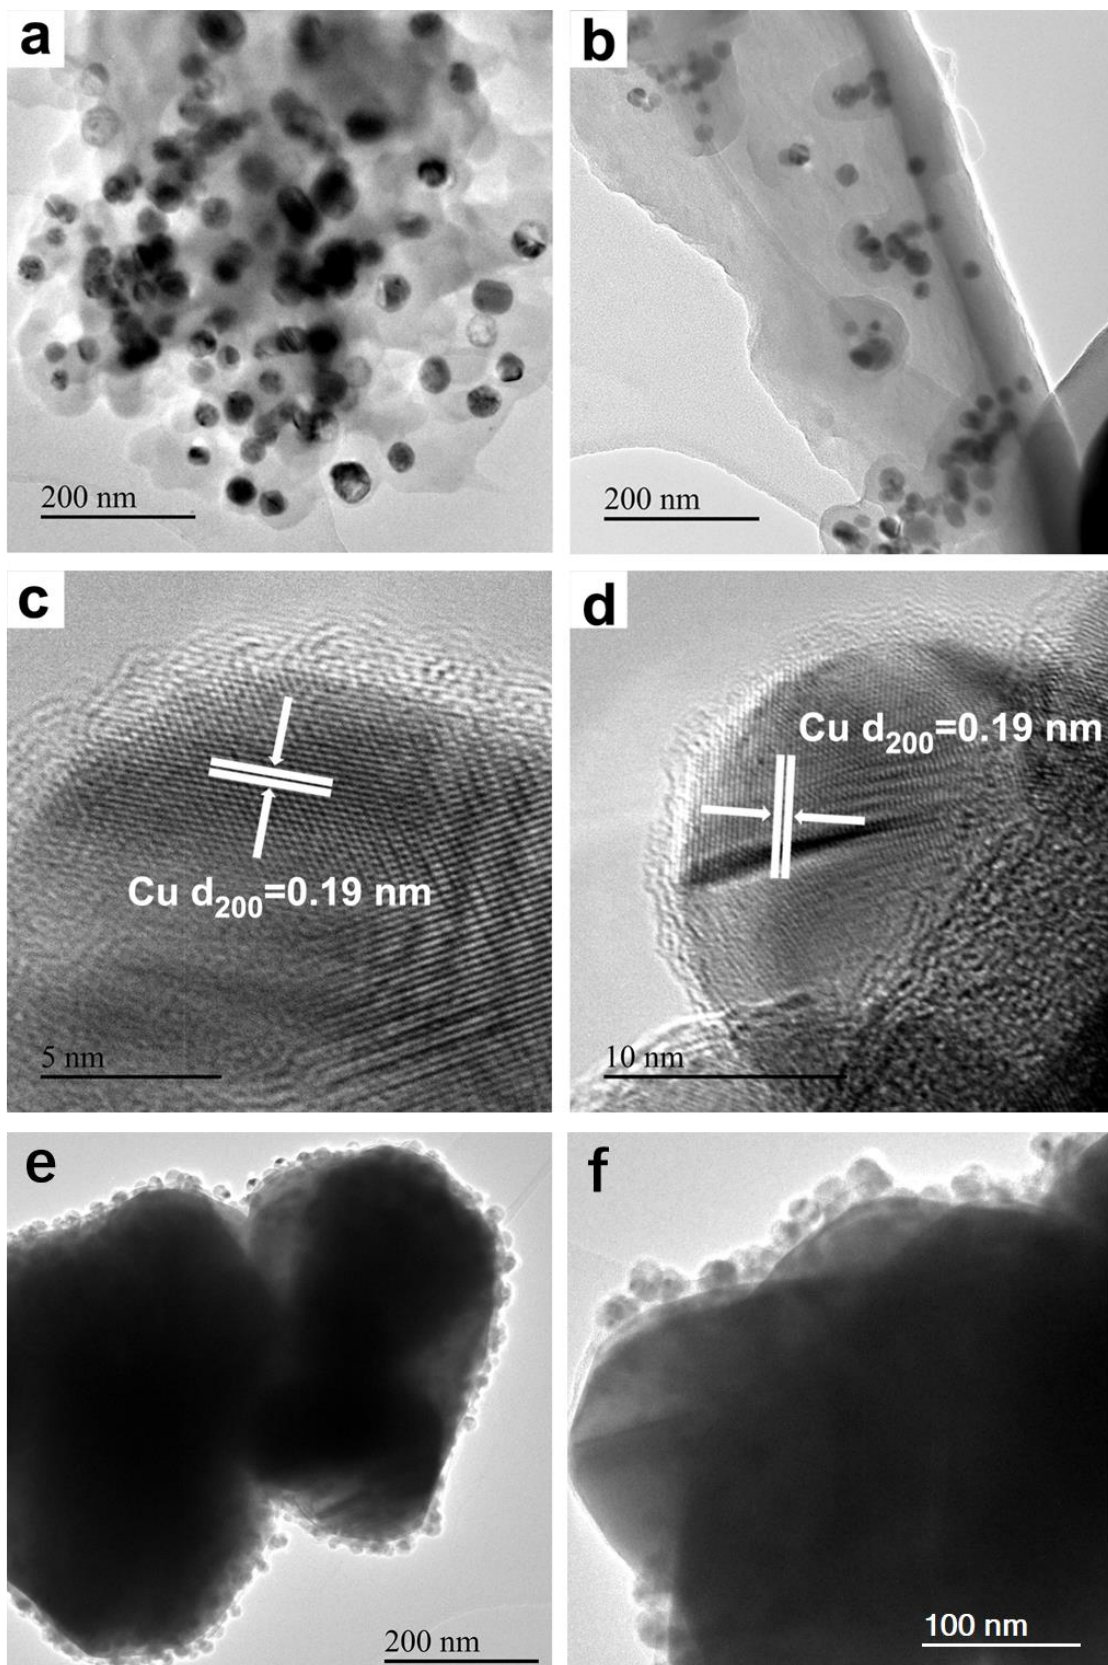

Figure S38. High-resolution TEM images of Cu@C sample. It should be noted that, there are also very big Cu nanoparticles present in the Cu@C sample.



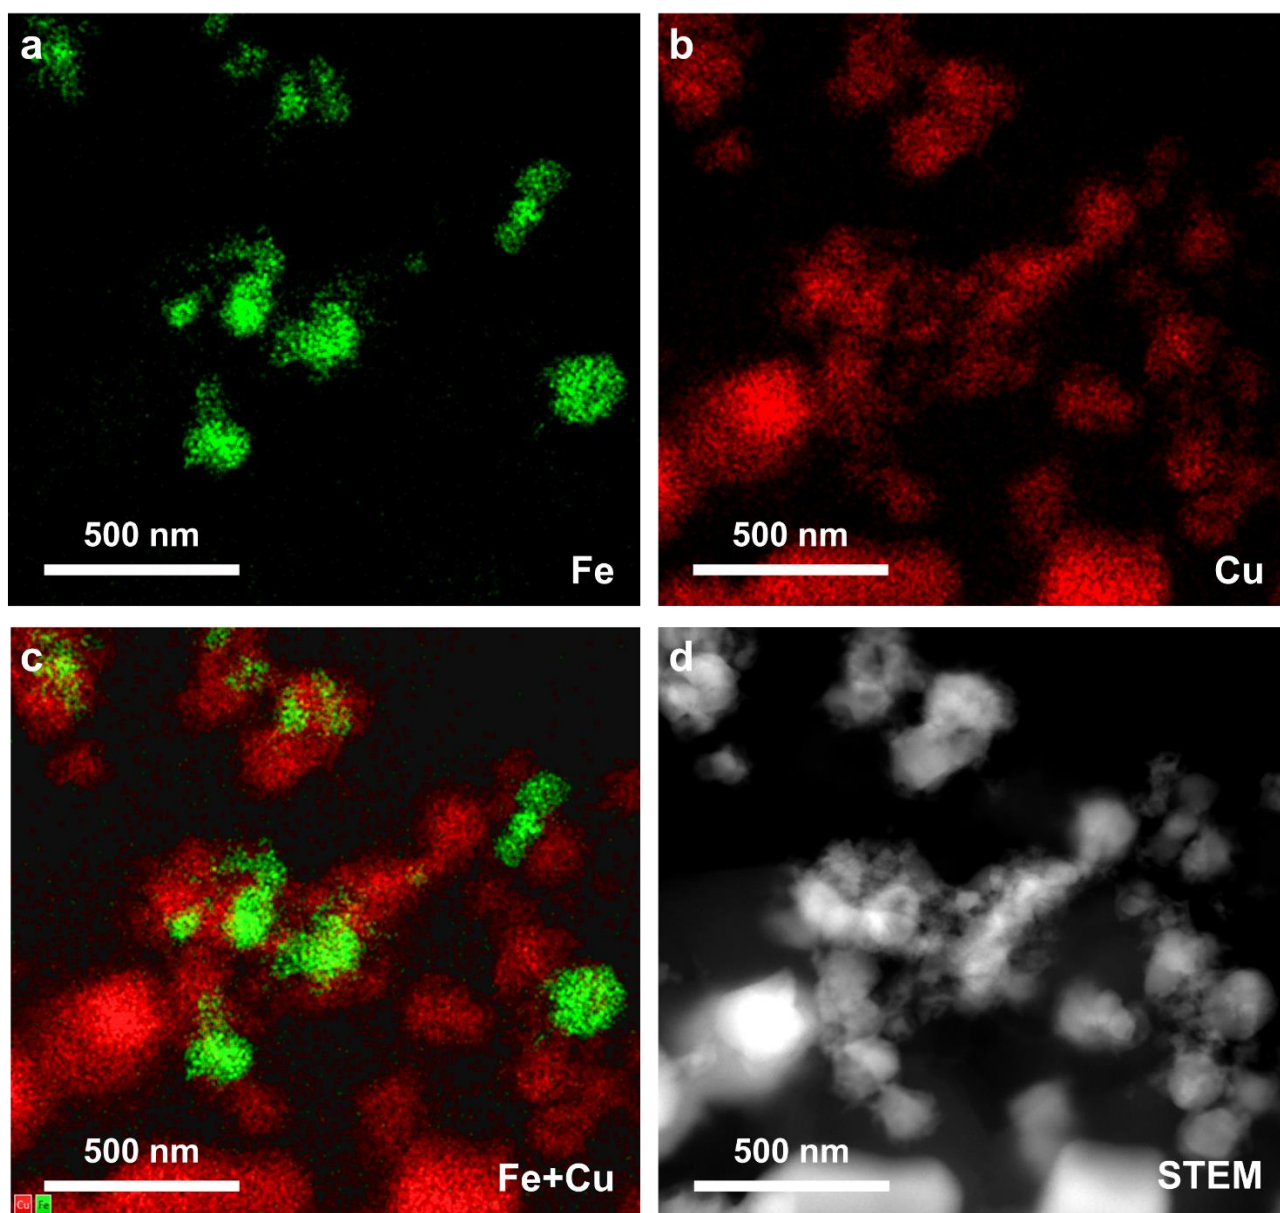

**Figure S39.** STEM-EDS mapping of Cu and Fe in the  $\text{Cu}_{0.76}\text{Fe}_{0.24}$  sample. (a-c) mapping of Cu and Fe in this area and the corresponding HAADF-STEM image (d).

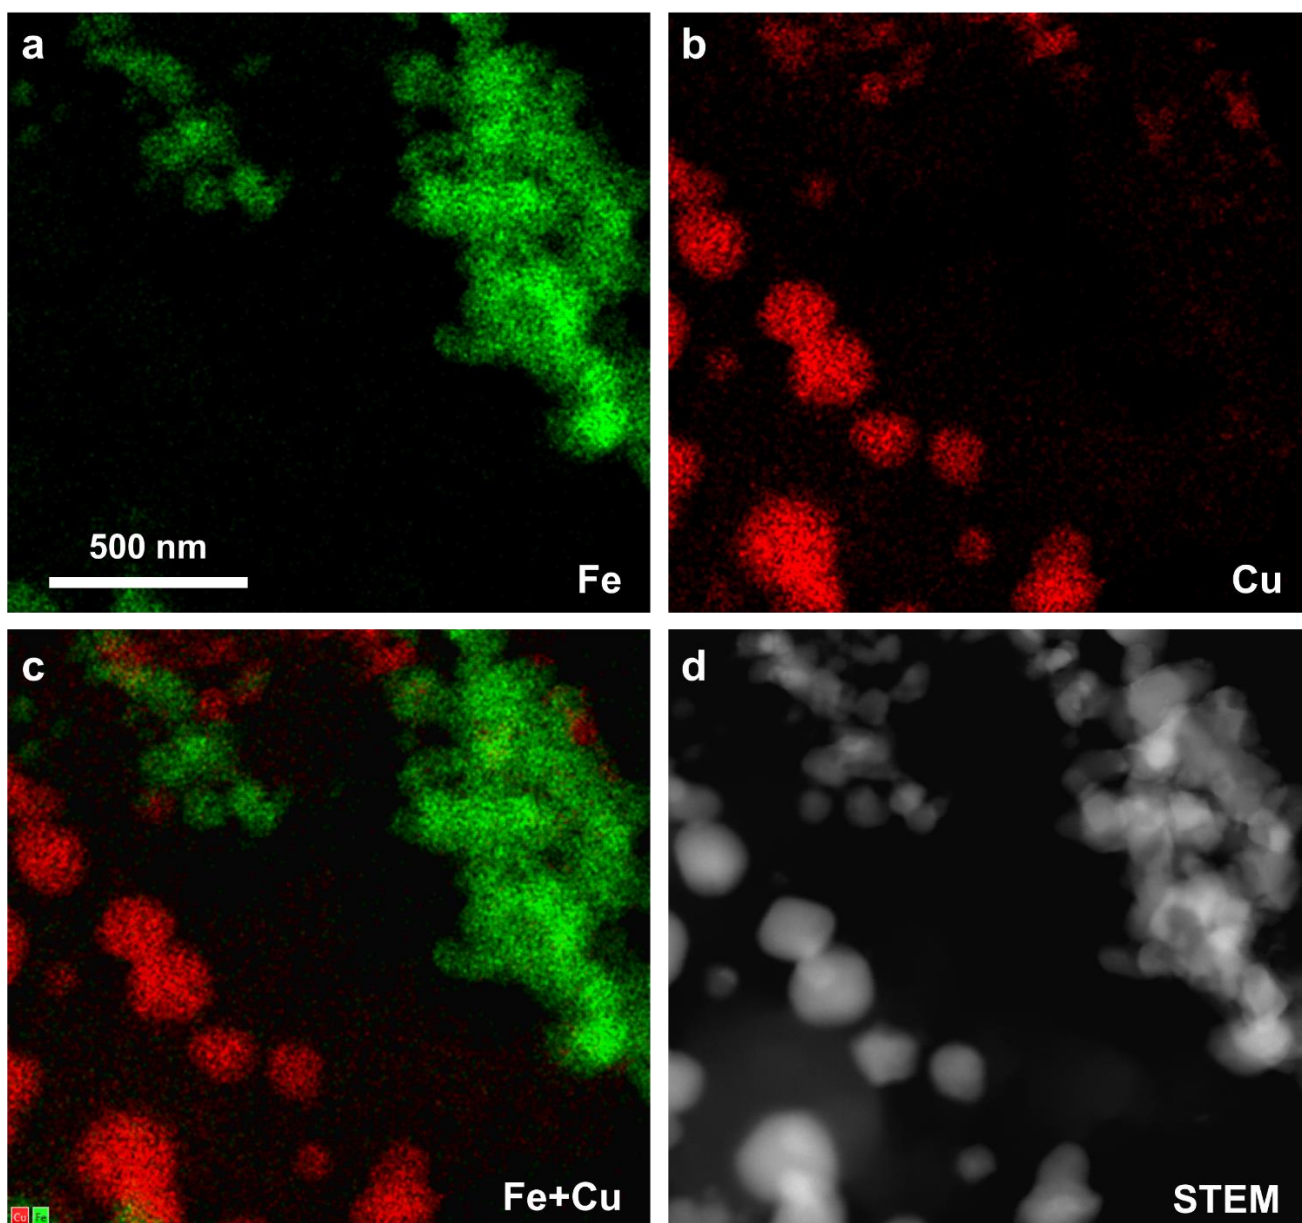

**Figure S40.** STEM-EDS mapping of Cu and Fe in the  $\text{Cu}_{0.50}\text{Fe}_{0.50}$  sample. (a-c) mapping of Cu and Fe in this area and the corresponding HAADF-STEM image (d).

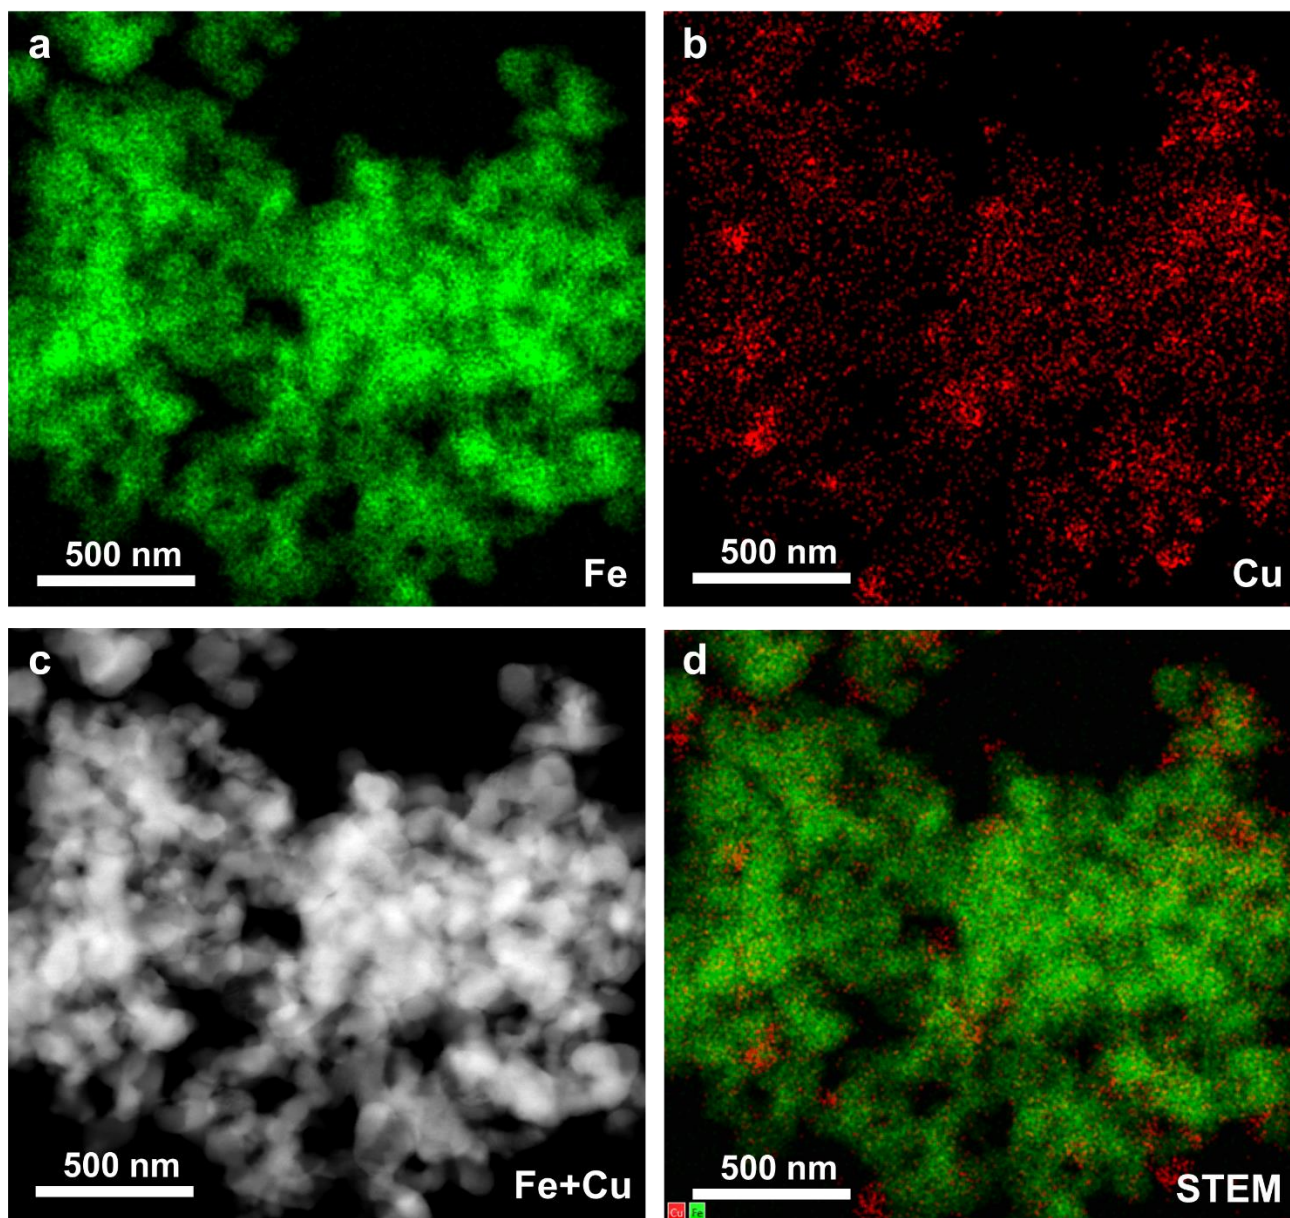

**Figure S41.** STEM-EDS mapping of Cu and Fe in the  $\text{Cu}_{0.24}\text{Fe}_{0.76}$  sample. (a-c) mapping of Cu and Fe in this area and the corresponding HAADF-STEM image (d).

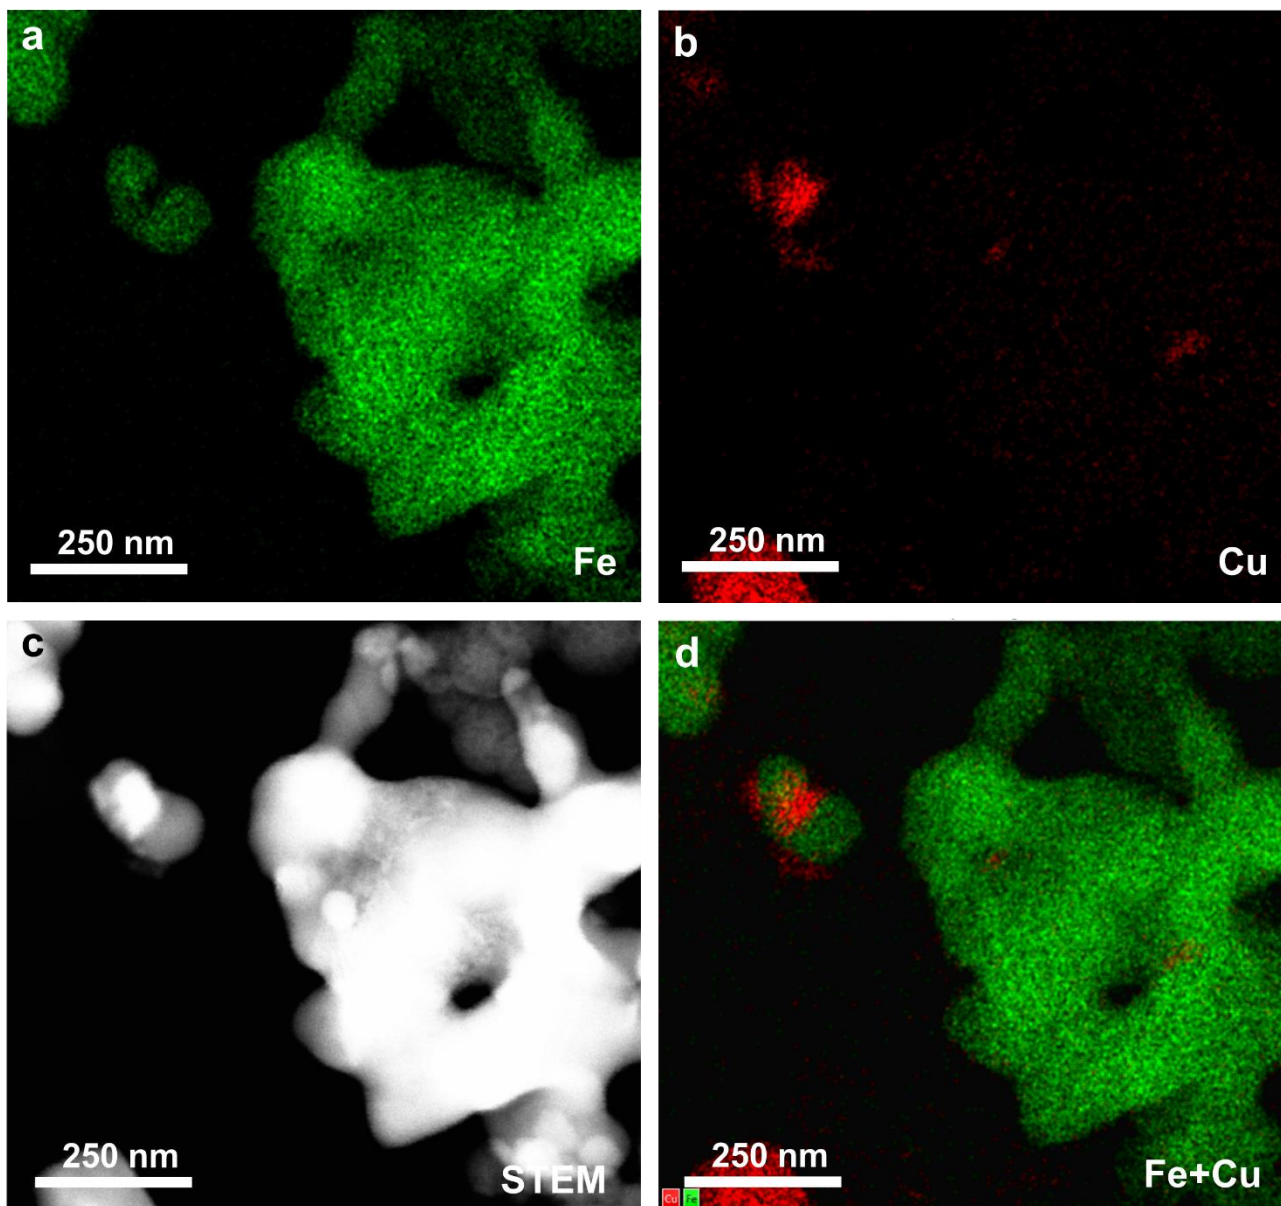

**Figure S42.** STEM-EDS mapping of Cu and Fe in the  $\text{Cu}_{0.12}\text{Fe}_{0.88}$  sample. (a-c) mapping of Cu and Fe in this area and the corresponding HAADF-STEM image (d).

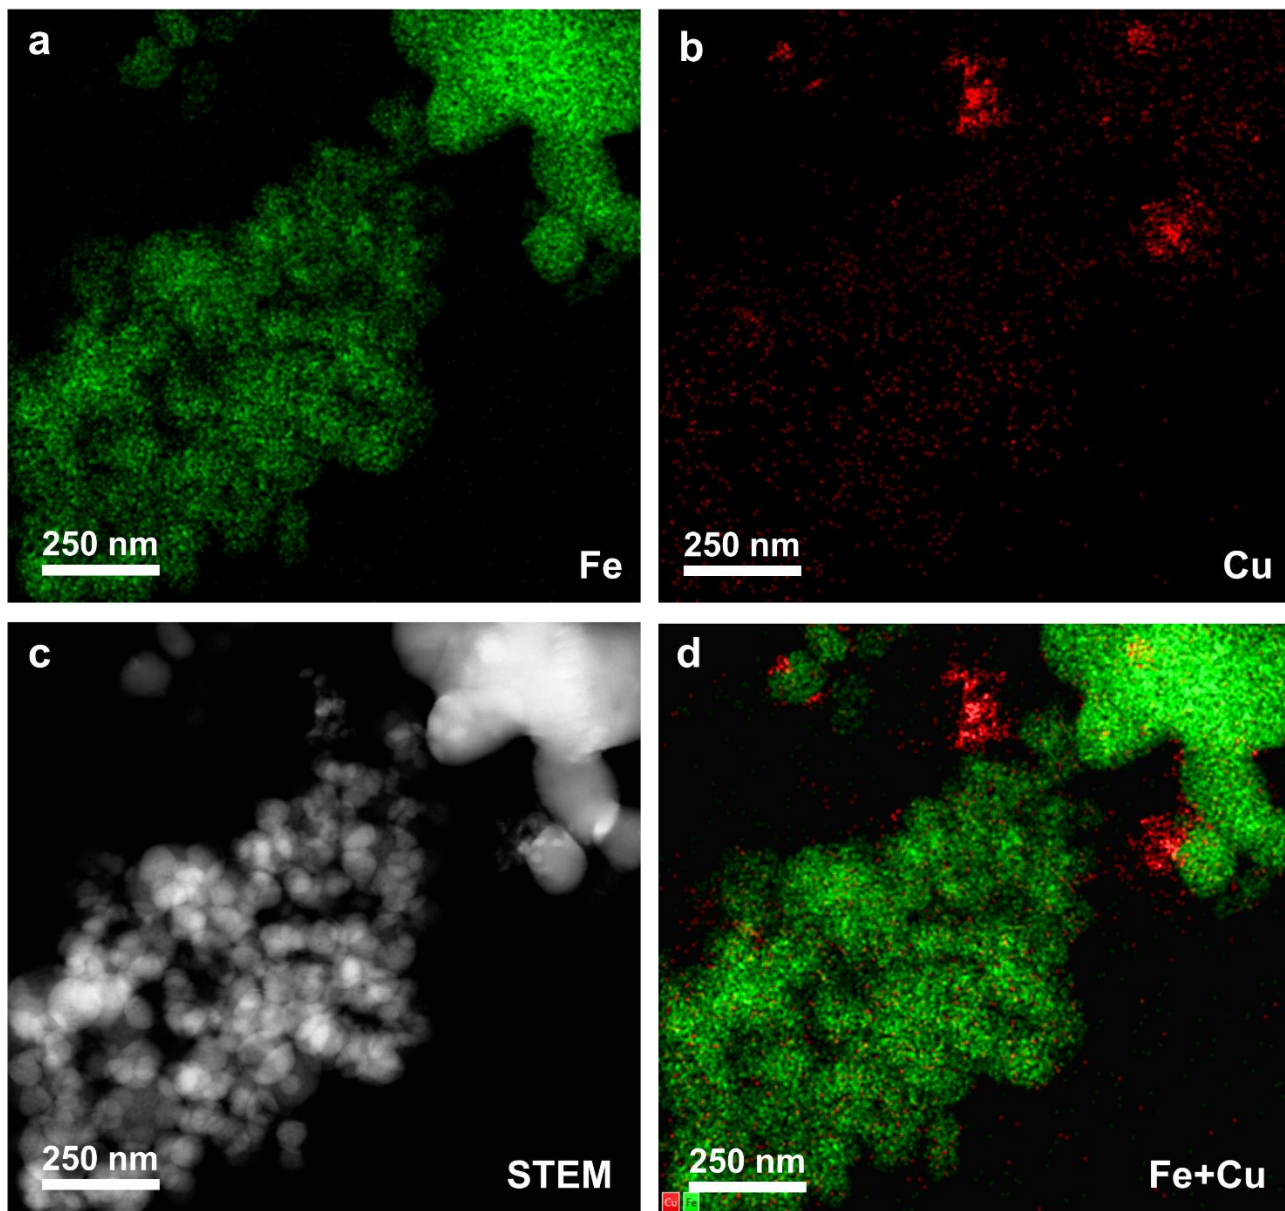

**Figure S43.** STEM-EDS mapping of Cu and Fe in the  $\text{Cu}_{0.08}\text{Fe}_{0.92}$  sample. (a-c) mapping of Cu and Fe in this area and the corresponding HAADF-STEM image (d).

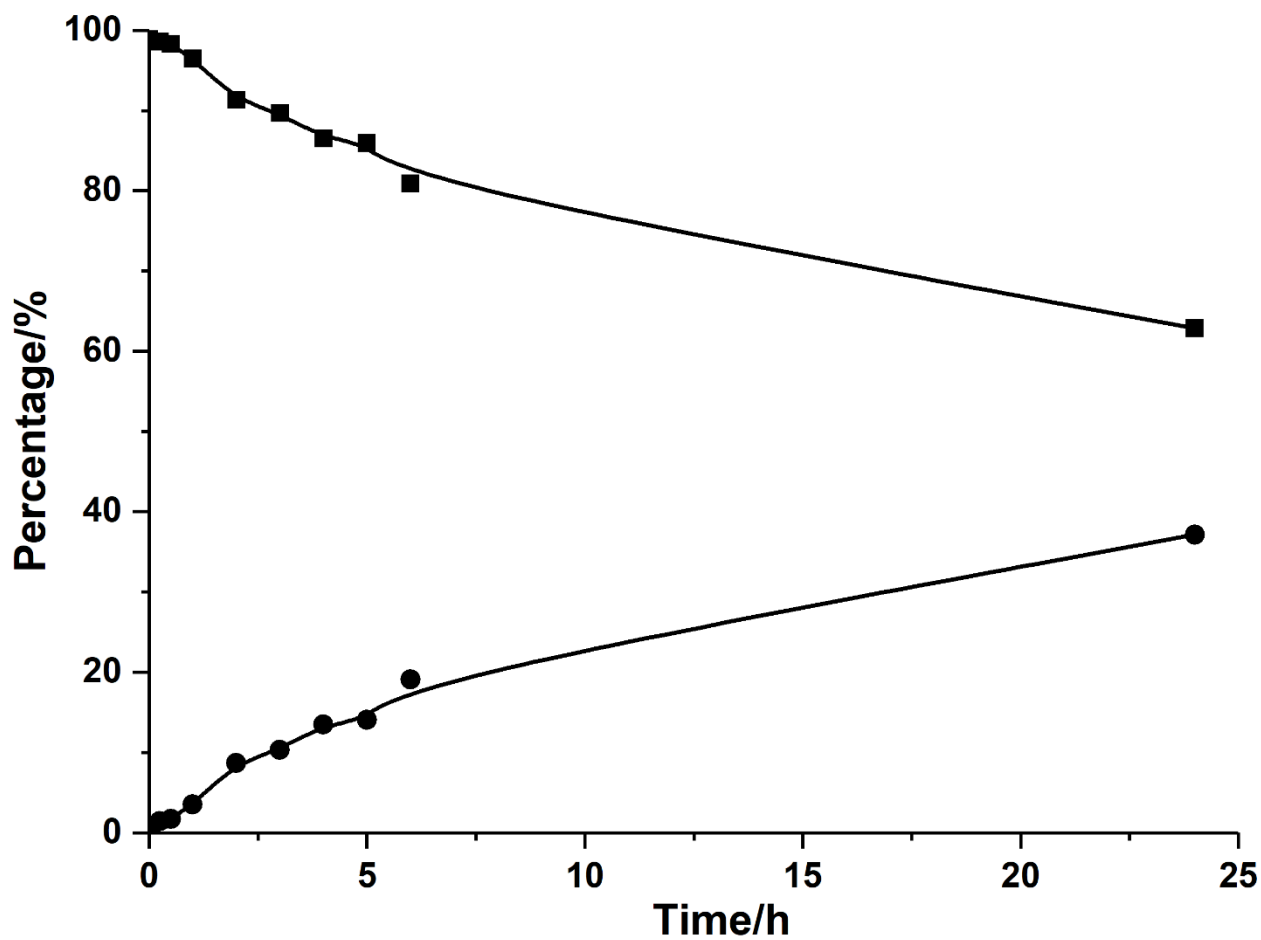

**Figure S44.** Kinetic curve of the hydrogenation of HMF with  $\text{Cu}_{0.08}\text{Fe}_{0.92}@C$  NPs. Reaction conditions: HMF (0.5 mmol, 63 mg), 10 mg catalyst, 10 bar  $\text{H}_2$ , MeOH (solvent, 5 ml), 110 °C. Determined by GC using dodecane as an internal standard. HMF (■), BHMF (●).

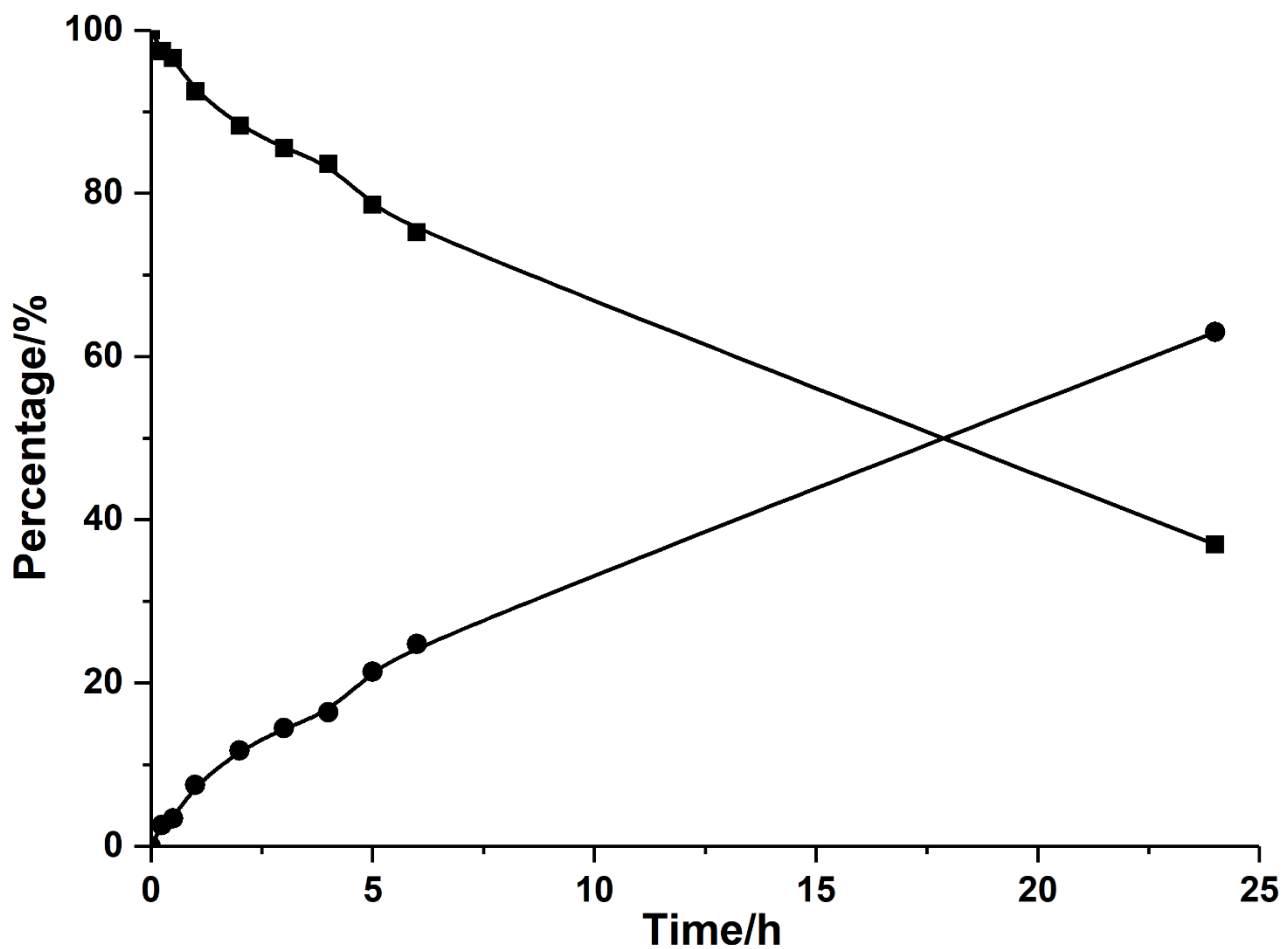

**Figure S45.** Kinetic curve of the hydrogenation of HMF with  $\text{Cu}_{0.12}\text{Fe}_{0.88}\text{@C}$  NPs. Reaction conditions: HMF (0.5 mmol, 63 mg), 10 mg catalyst, 10 bar  $\text{H}_2$ , MeOH (solvent, 5 ml), 110 °C. Determined by GC using dodecane as an internal standard. HMF (■), BHMf (●).

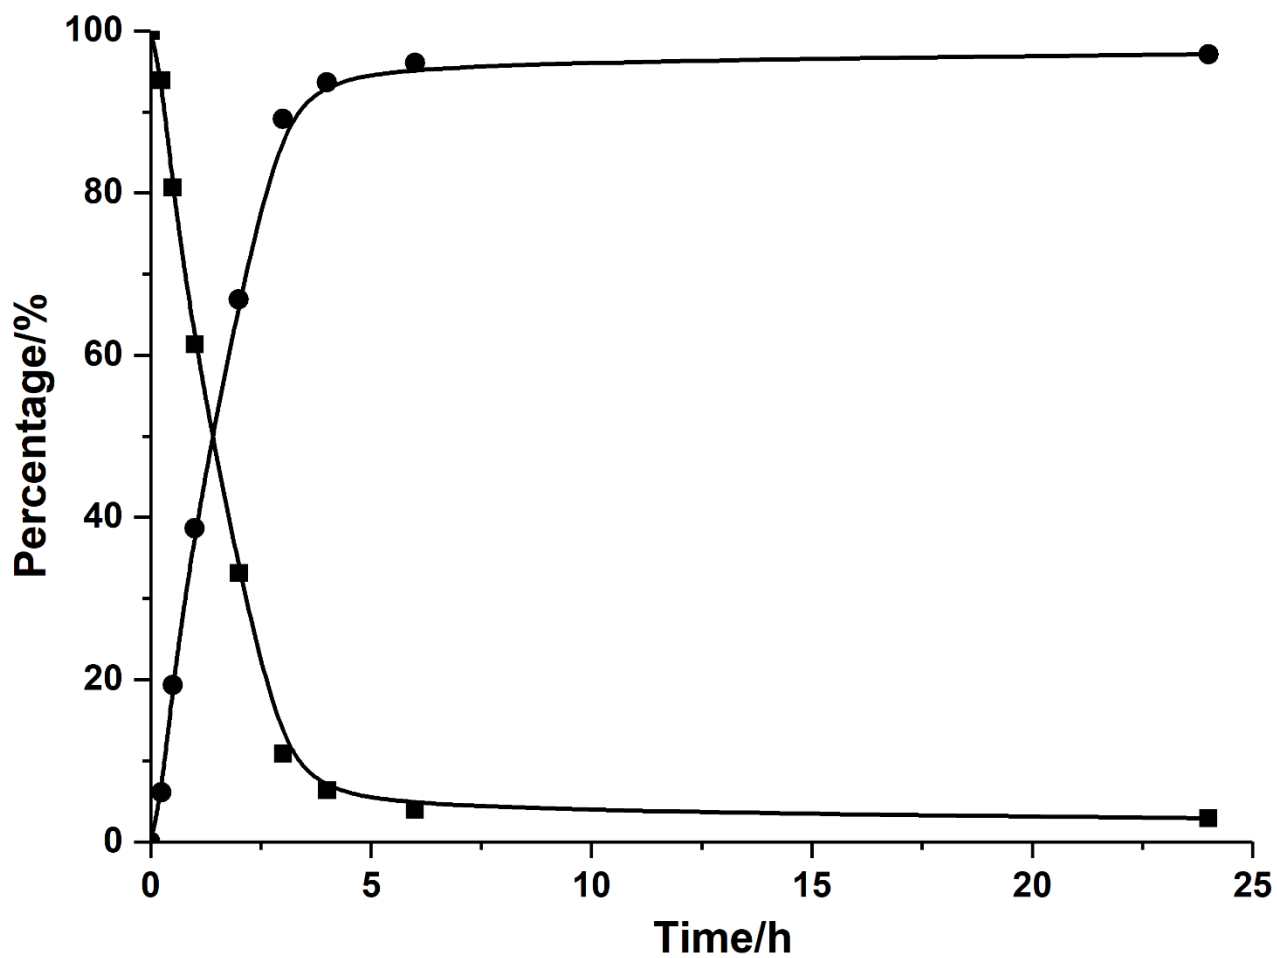

**Figure S46.** Kinetic curve of the hydrogenation of HMF with  $\text{Cu}_{0.24}\text{Fe}_{0.76}\text{@C}$  NPs. Reaction conditions: HMF (0.5 mmol, 63 mg), 10 mg catalyst, 10 bar  $\text{H}_2$ , MeOH (solvent, 5 ml), 110 °C. Determined by GC using dodecane as an internal standard. HMF (■), BHMF (●).



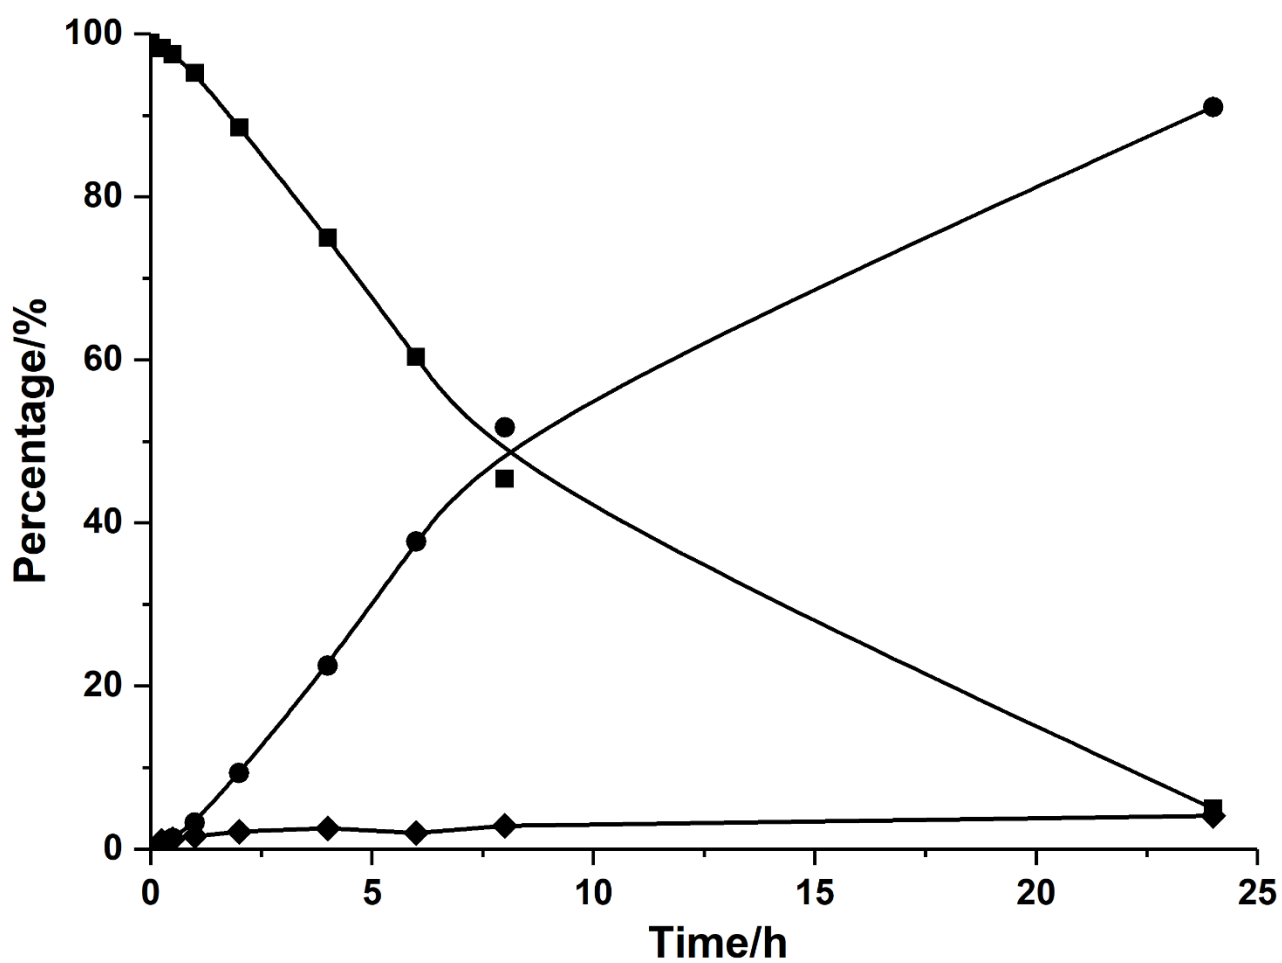

**Figure S47.** Kinetic curve of the hydrogenation of HMF with  $\text{Cu}_{0.50}\text{Fe}_{0.50}\text{@C}$  NPs. Reaction conditions: HMF (0.5 mmol, 63 mg), 10 mg catalyst, 10 bar  $\text{H}_2$ , MeOH (solvent, 5 ml), 110 °C. Determined by GC using dodecane as an internal standard. HMF (■), BHMF (●), Acetal (◆).

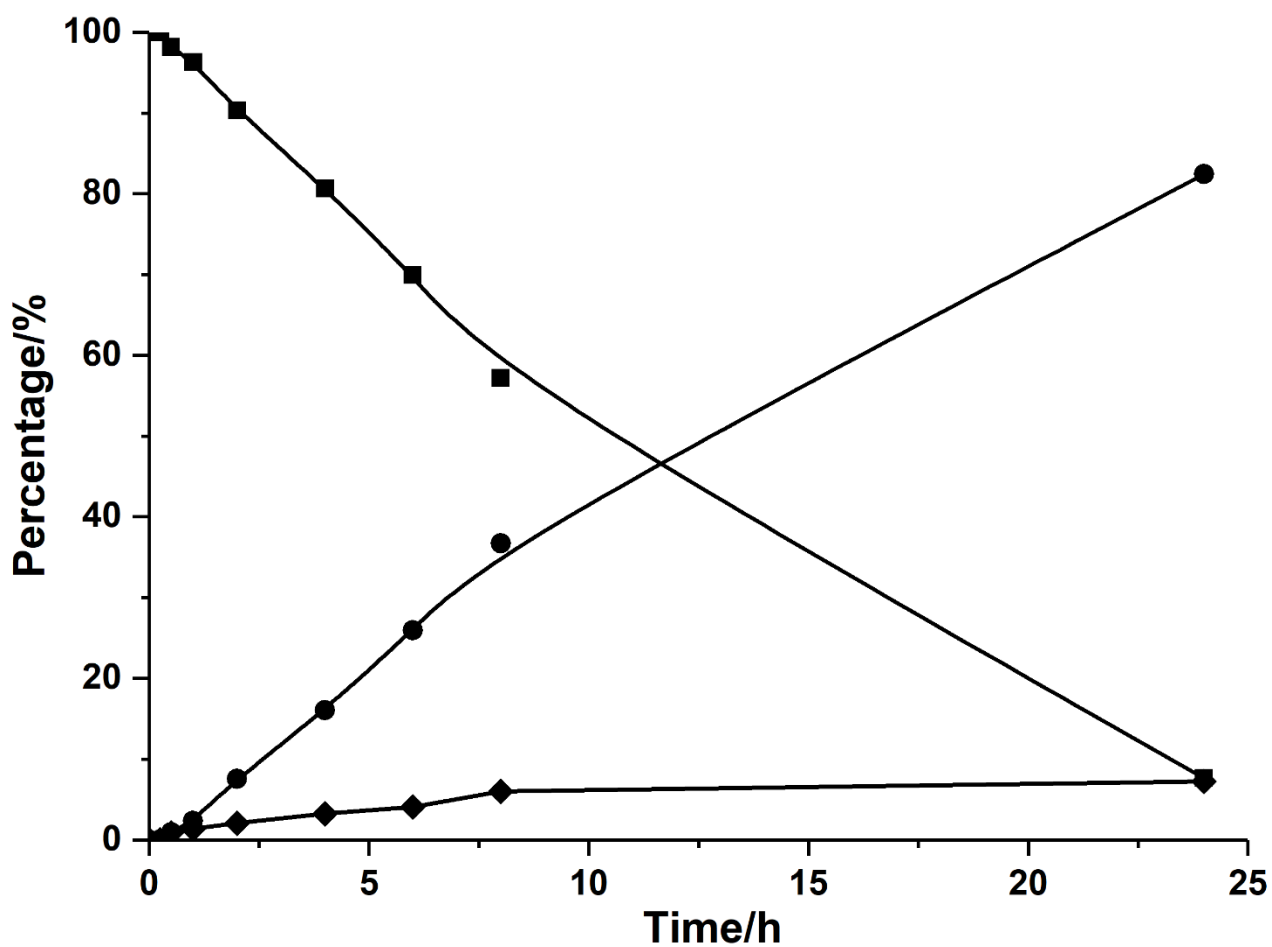

**Figure S48.** Kinetic curve of the hydrogenation of HMF with  $\text{Cu}_{0.75}\text{Fe}_{0.25}@C$  NPs. Reaction conditions: HMF (0.5 mmol, 63 mg), 10 mg catalyst, 10 bar  $\text{H}_2$ , MeOH (solvent, 5 ml), 110 °C. Determined by GC using dodecane as an internal standard. HMF (■), BHMF (●), Acetal (◆).

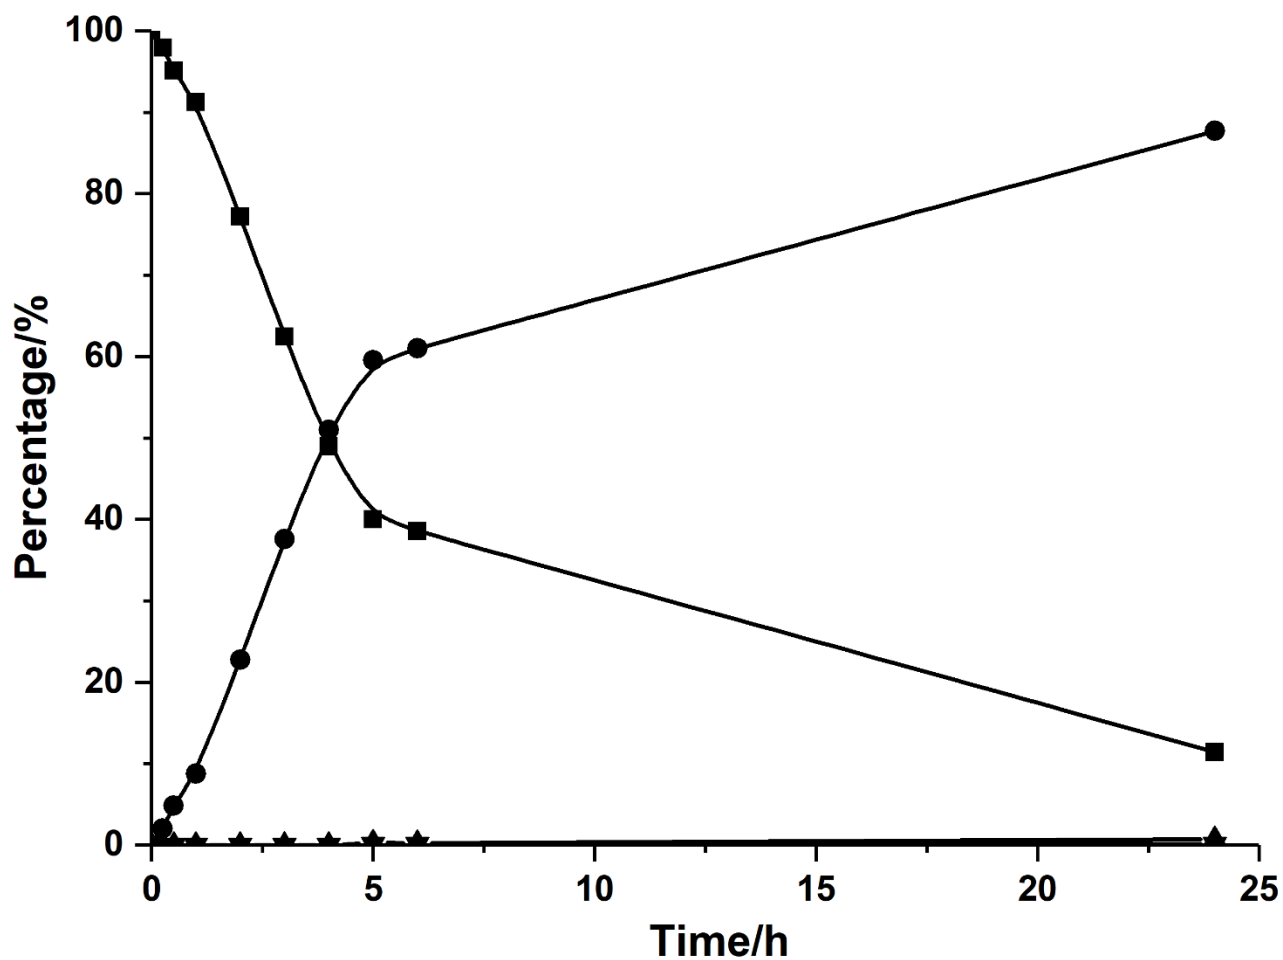

**Figure S49.** Kinetic curve of the hydrogenation of HMF with Cu@C NPs. Reaction conditions: HMF (0.5 mmol, 63 mg), 10 mg catalyst, 10 bar H<sub>2</sub>, MeOH (solvent, 5 ml), 110 °C. Determined by GC using dodecane as an internal standard. HMF (■), BHMF (●), Acetal (◆).

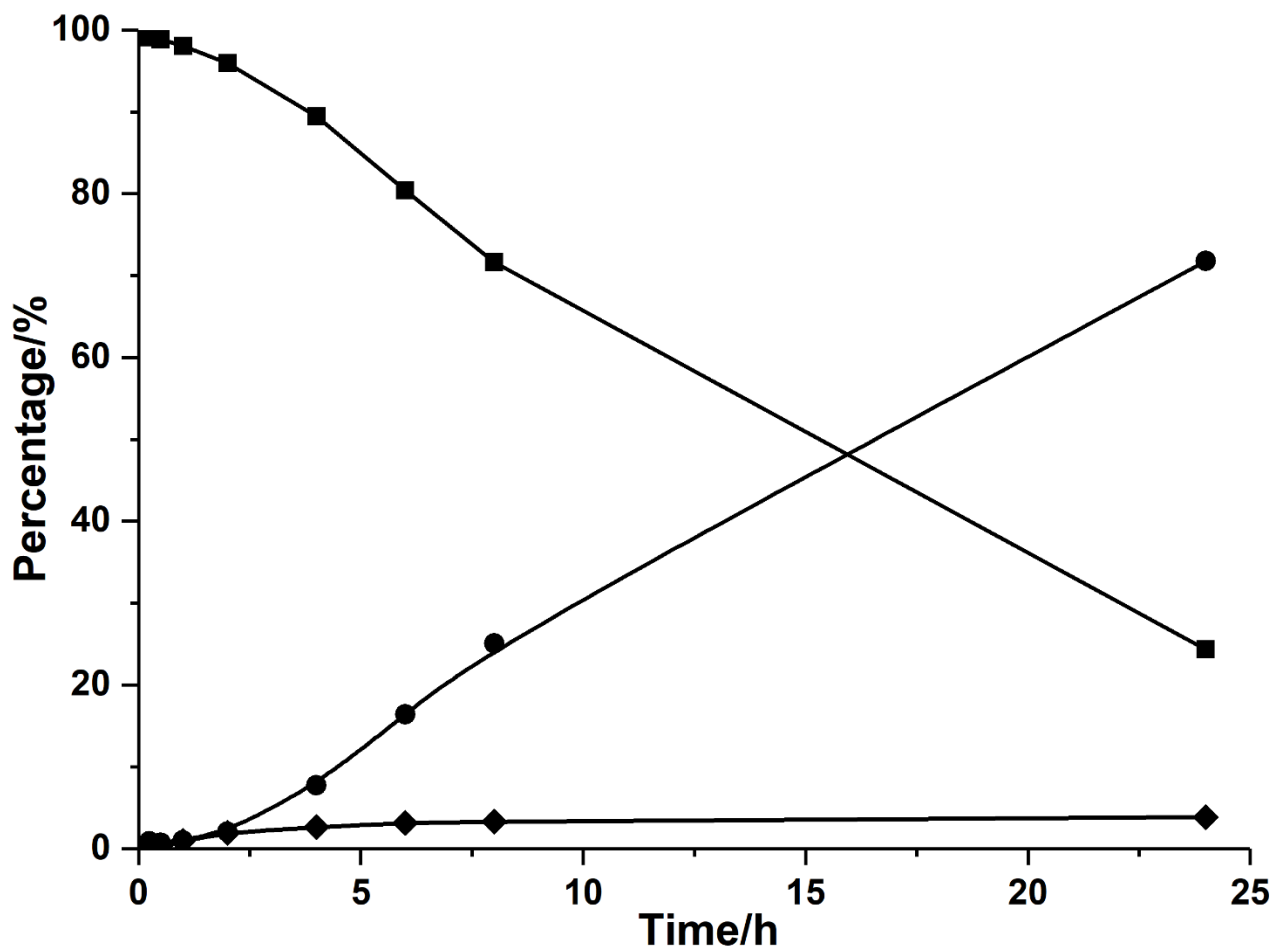

**Figure S50.** Kinetic curve of the hydrogenation of HMF with Fe/Cu@C catalyst with ~25 wt% of Fe on Cu@C nanoparticles loaded by wetness impregnation. Reaction conditions: 0.5 mmol HMF, 10 mg of catalyst, 5 mL methanol as solvent, 110 °C and 10 bar of H<sub>2</sub>. After 1 h, the catalyst was separated and the reaction was continued. HMF (■), BHMF (●), Acetal (◆).

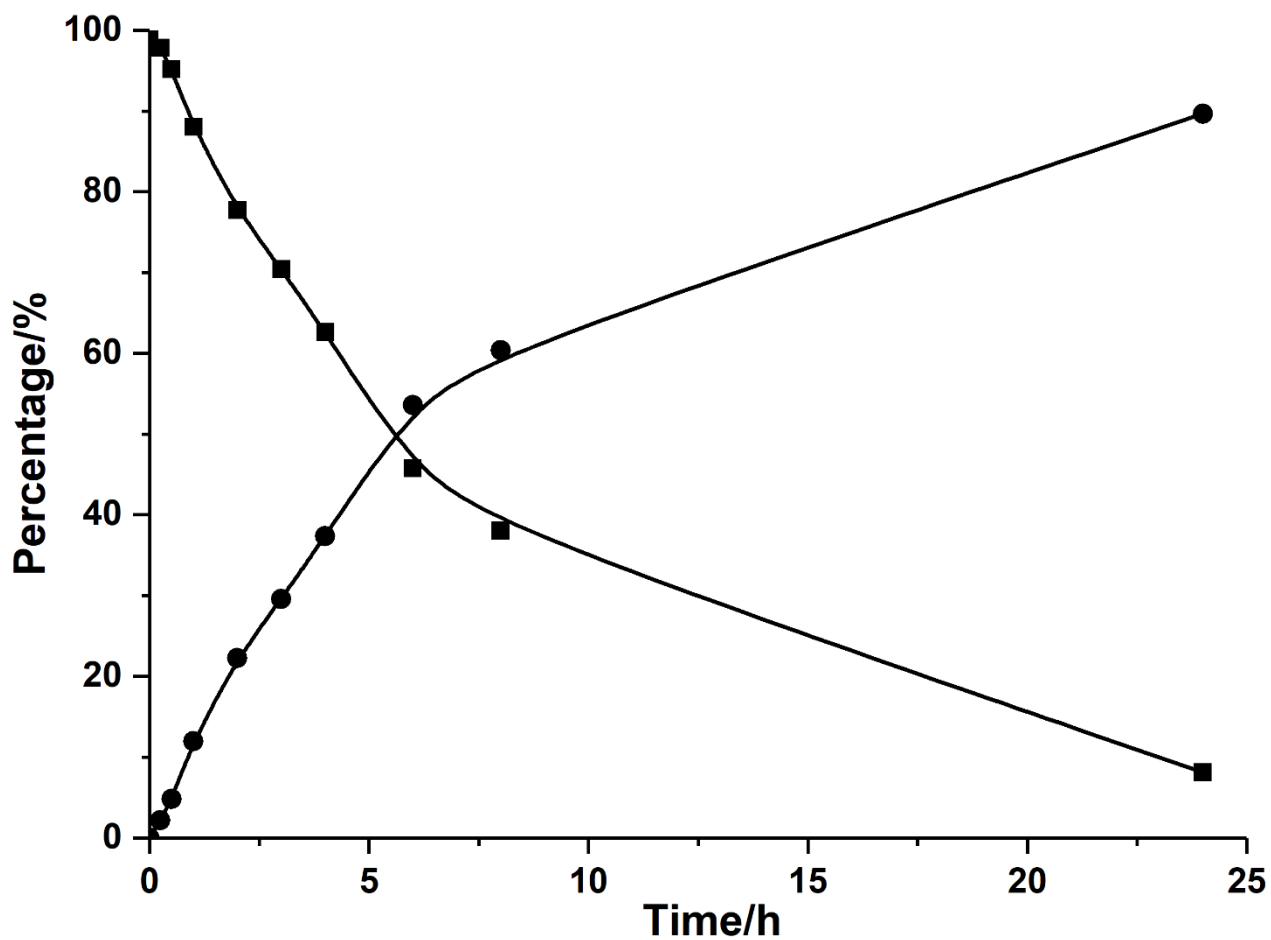

**Figure S51.** Kinetic curve of the hydrogenation of HMF with mixture of Fe@C and Cu@C NPs (3:1). Reaction conditions: 0.5 mmol HMF, 10 mg of solid catalyst, 5 mL methanol as solvent, 110 °C and 10 bar of H<sub>2</sub>. After 1 h, the catalyst was separated and the reaction was continued. HMF (■), BHMF (●).

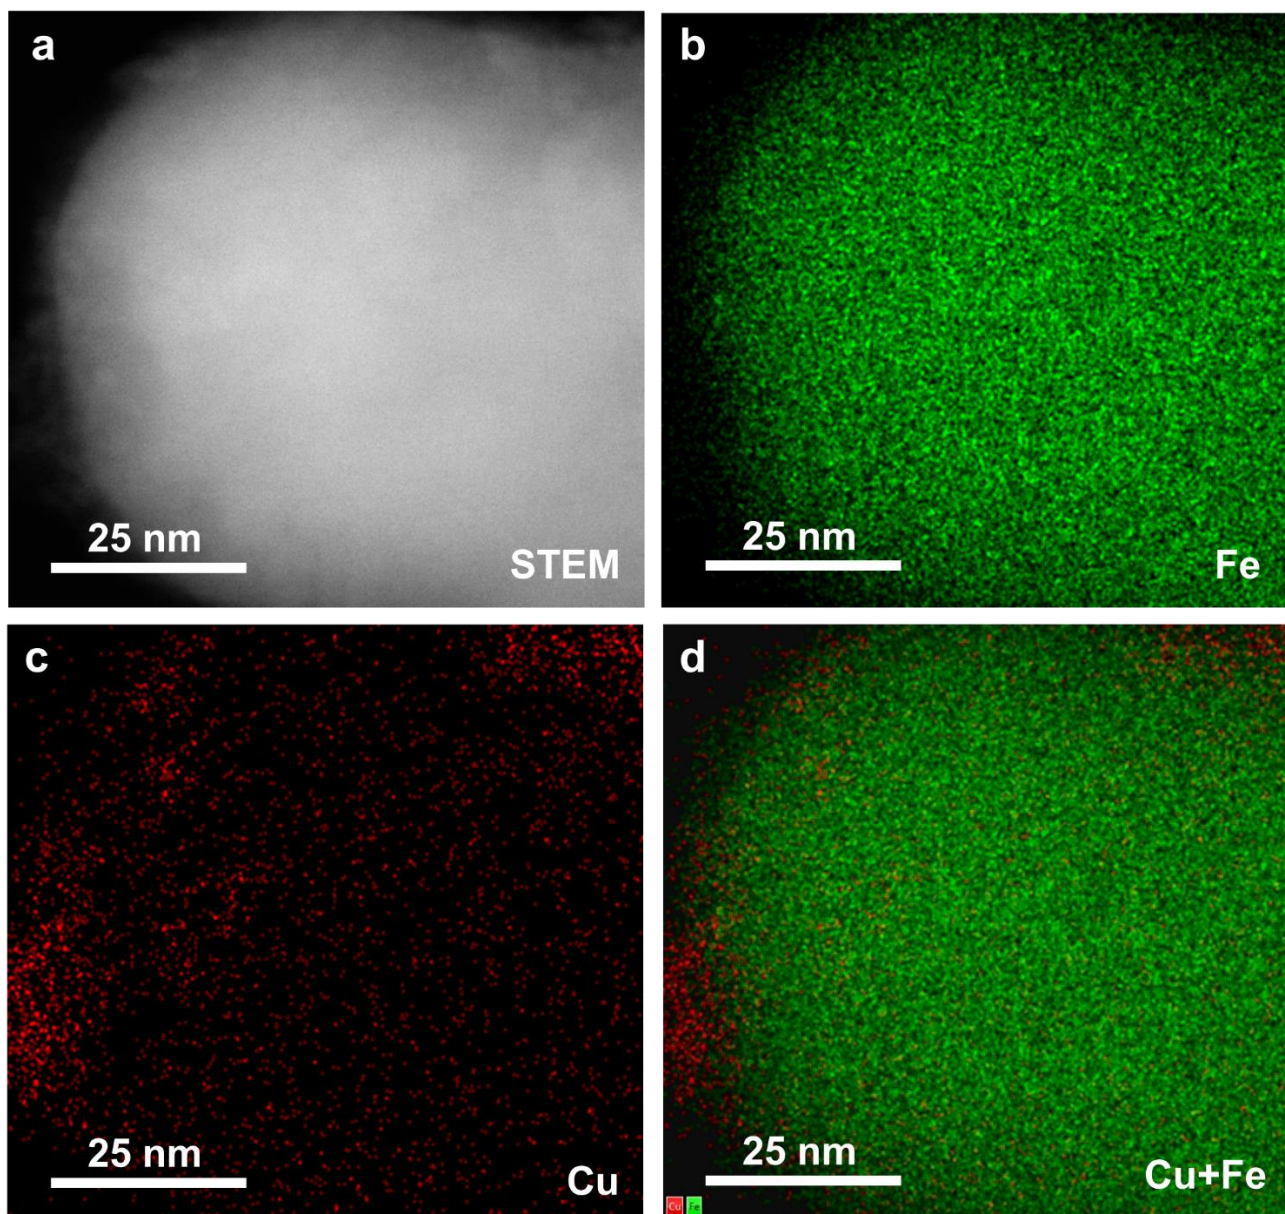

**Figure S52.** Distributions of Cu species on Fe nanoparticles measured by STEM-EDS mapping in the  $\text{Cu}_{0.24}\text{Fe}_{0.76}@C$  sample. As can be seen in (c), Cu patches and highly dispersed Cu species can be observed.

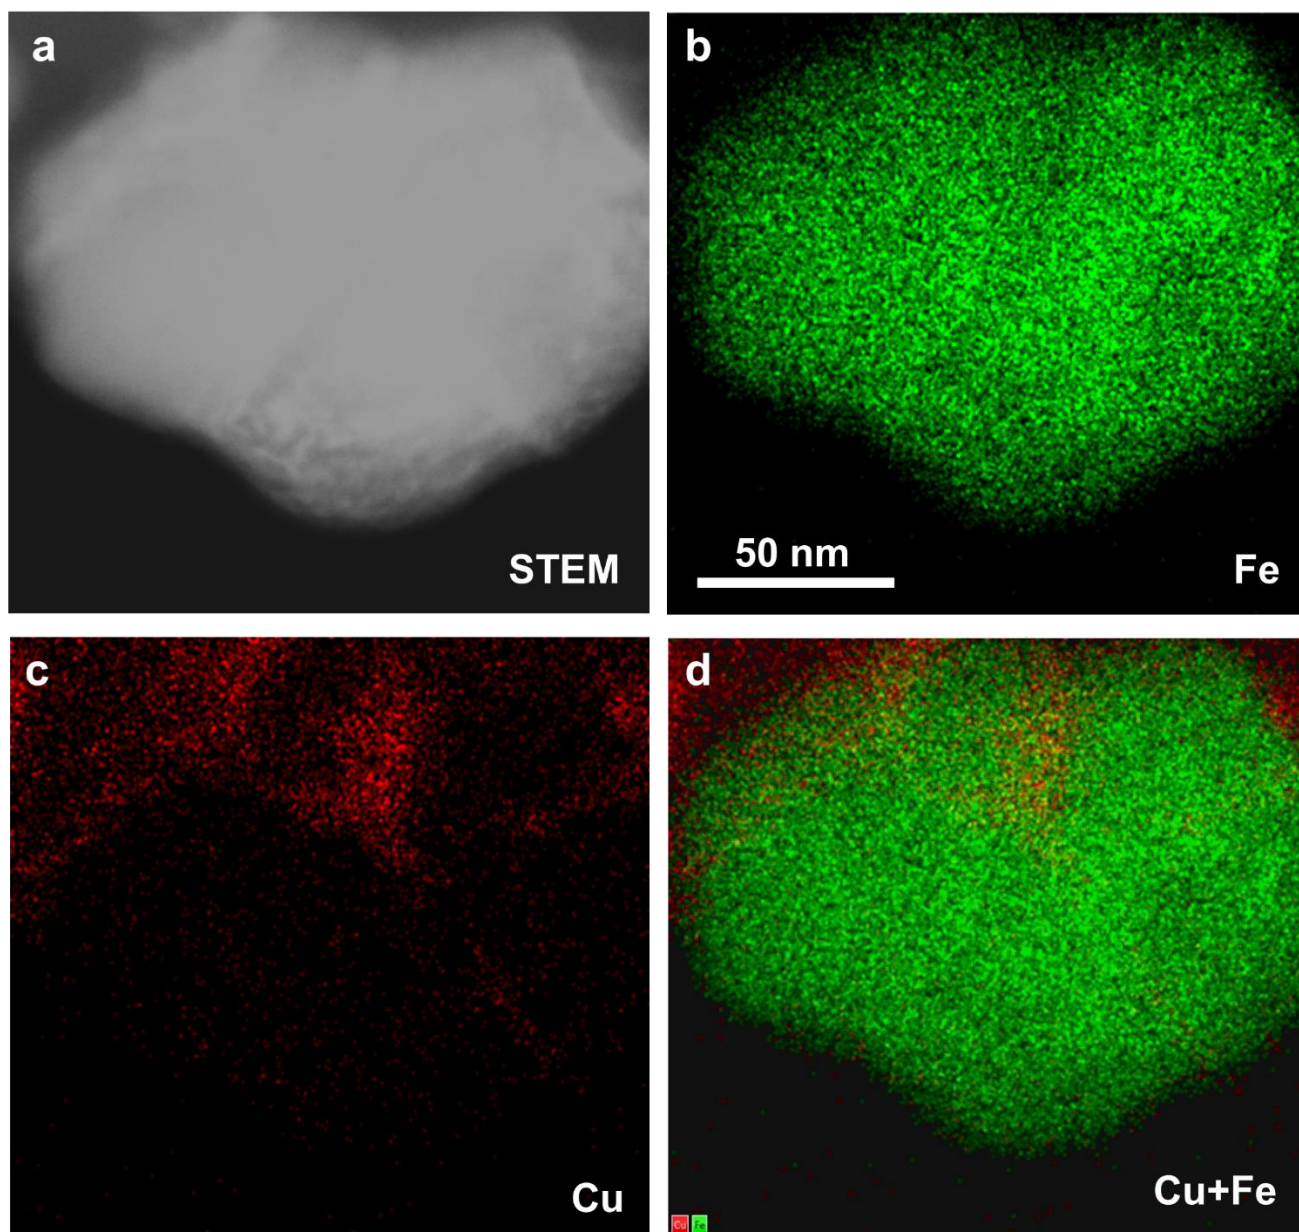

**Figure S53.** Distributions of Cu species on Fe nanoparticles measured by STEM-EDS mapping in the  $\text{Cu}_{0.24}\text{Fe}_{0.76}@C$  sample. As can be seen in (c), Cu patches and highly dispersed Cu species can be observed.

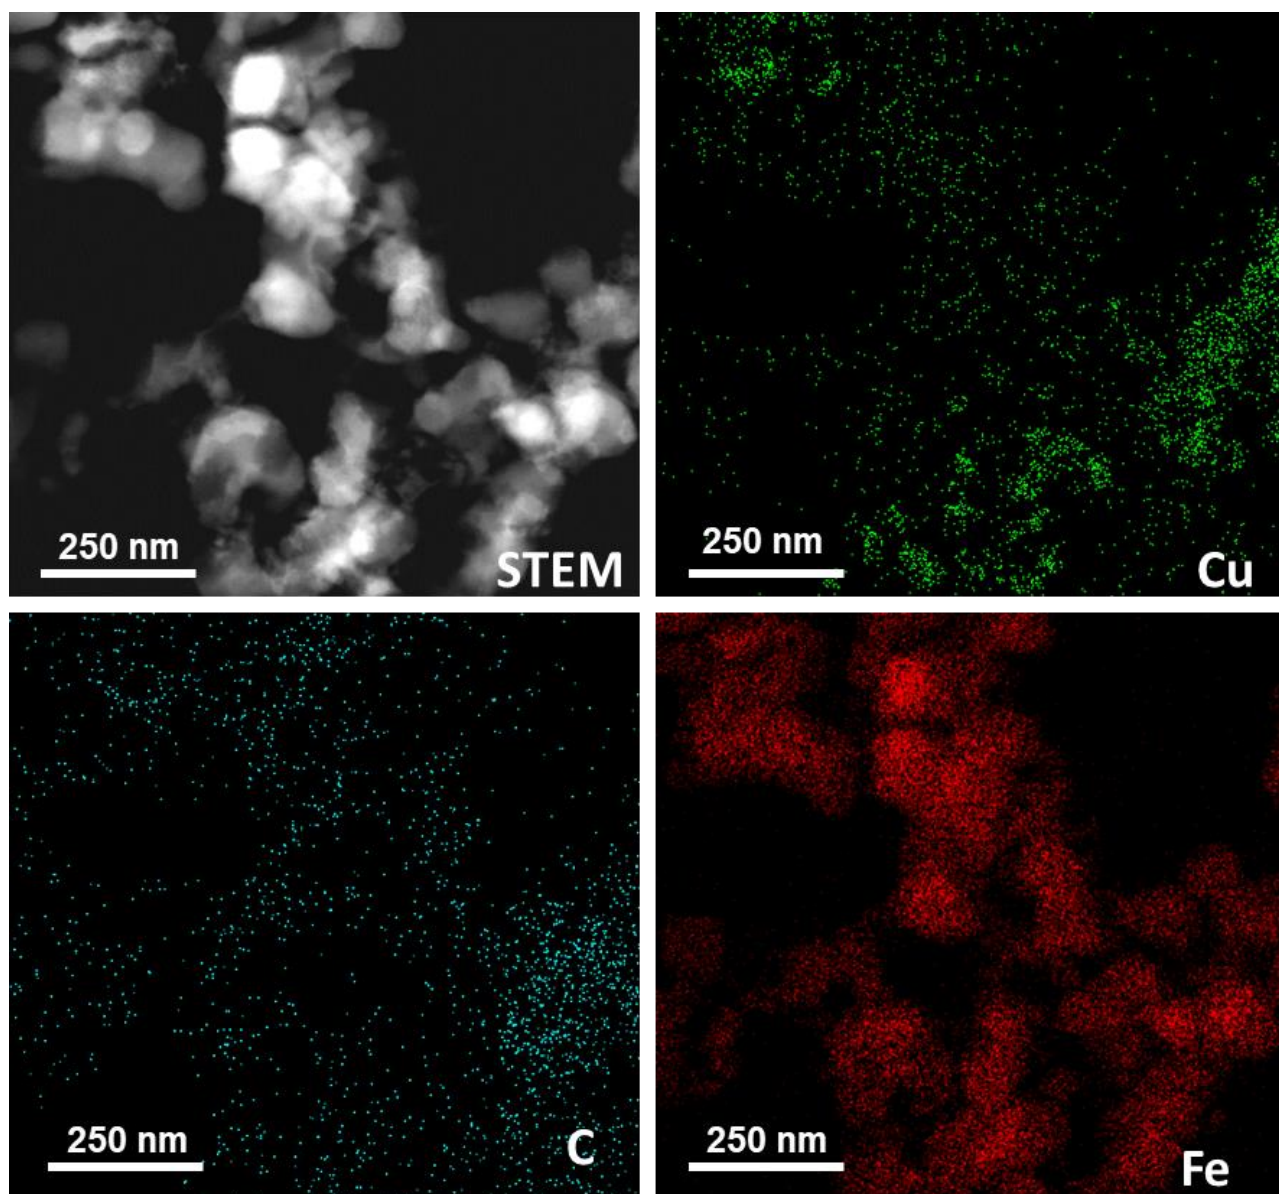

**Figure S54.** STEM image and the corresponding EDS mapping of a representative area in the  $\text{Cu}_{0.24}\text{Fe}_{0.76}@C$  sample.



**Table S2.** Catalytic performance of non-noble metal catalysts for hydrogenation of 5-(hydroxymethyl)furfural (HMF) to 2,5-Bis(hydroxymethyl)furan (BHMF).

| Catalyst                                | Solid Catalyst /mg | Metal /mg | HMF/ mmol | Mass ratio of HMF to solid catalyst | Temp./ °C | H <sub>2</sub> / MPa | Time /h | HMF Conversion /% | Selectivity to BHMF/% | Ref.      |
|-----------------------------------------|--------------------|-----------|-----------|-------------------------------------|-----------|----------------------|---------|-------------------|-----------------------|-----------|
| NiFe/CNT                                | 50                 | 5.5       | 4         | 10                                  | 110       | 3                    | 18      | 100               | 96.1                  | 1         |
| CuZn alloy                              | 100                | 100       | 4         | 5                                   | 120       | 7                    | 3       | >99               | 95                    | 2         |
| NiCu/SiO <sub>2</sub>                   | 100                | 65        | 4         | 5                                   | 120       | 7                    | 3       | 96                | 88                    | 2         |
| NiCu/SiO <sub>2</sub> -ZrO <sub>2</sub> | 100                | 39        | 4         | 5                                   | 120       | 7                    | 3       | 85                | 85                    | 2         |
| NiCu/CeO <sub>2</sub> /ZrO <sub>2</sub> | 100                | 38        | 4         | 5                                   | 120       | 7                    | 3       | >99               | 44                    | 2         |
| Cu@C                                    | 20                 | 20        | 2         | 12.5                                | 180       | 5                    | 8       | 70                | 77                    | 3         |
| Cu/K/Al <sub>2</sub> O <sub>3</sub>     | 100                | 1.6       | 0.8       | 1                                   | 60        | 6                    | 10      | 99                | 90                    | 4         |
| Cu/CoAlO <sub>x</sub>                   | 100                | 8.5       | 2.4       | 3                                   | 180       | 1                    | 5       | 97.3              | 95.3                  | 5         |
| Ni-Al oxide                             | 30                 | 14        | 1.8       | 7.5                                 | 100       | 2                    | 6       | 96                | 71                    | 6         |
| Cu/PMO                                  | 100                | 31        | 4         | 5                                   | 100       | 5                    | 3       | 100               | 99                    | 7         |
| Cu/ZnO                                  | 500                | 270       | 11.9      | 3                                   | 140       | 1.5                  | 1       | 97.5              | 94.4                  | 8         |
| CoAlO <sub>x</sub>                      | 200                | 60        | 8         | 5                                   | 120       | 4                    | 4       | 89.4              | 83                    | 9         |
| Cu@POP                                  | 200                | 20.7      | 5         | 3.1                                 | 150       | 2                    | 10      | 100               | 100                   | 10        |
| CuFe@C                                  | 10                 | 10        | 0.5       | 6.3                                 | 110       | 1                    | 6       | 94                | >99                   | This work |

### References for Table S2:

1. Yu, L.; He, L.; Chen, J.; Zheng, J.; Ye, L.; Lin, H.; Yuan, Y. Robust and Recyclable Nonprecious Bimetallic Nanoparticles on Carbon Nanotubes for the Hydrogenation and Hydrogenolysis of 5-Hydroxymethylfurfural. *ChemCatChem* **2015**, *7*, 1701-1707.
2. Bottari, G.; Kumalapatni, A. J.; Krawczyk, K. K.; Feringa, B. L.; Heeres, H. J.; Barta, K. Copper-zinc alloy nanopowder: a robust precious-metal-free catalyst for the conversion of 5-hydroxymethylfurfural. *ChemSusChem* **2015**, *8*, 1323-1327.
3. Chen, B.; Li, F.; Huang, Z.; Yuan, G. Carbon-coated Cu-Co bimetallic nanoparticles as selective and recyclable catalysts for production of biofuel 2,5-dimethylfuran. *Applied Catalysis B: Environmental* **2017**, *200*, 192-199.
4. Sun, K.; Shao, Y.; Li, Q.; Liu, Q.; Wu, W.; Wang, Y.; Hu, S.; Xiang, J.; Liu, Q.; Hu, X. Cu-based catalysts for hydrogenation of 5-hydroxymethylfurfural: Understanding of the coordination between copper and alkali/alkaline earth additives. *Molecular Catalysis* **2019**, *474*, 110407.
5. Wang, Q.; Feng, J.; Zheng, L.; Wang, B.; Bi, R.; He, Y.; Liu, H.; Li, D. Interfacial Structure-Determined Reaction Pathway and Selectivity for 5-(Hydroxymethyl)furfural Hydrogenation over Cu-Based Catalysts. *ACS Catalysis* **2019**, *10*, 1353-1365.
6. Perret, N.; Grigoropoulos, A.; Zanella, M.; Manning, T. D.; Claridge, J. B.; Rosseinsky, M. J. Catalytic Response and Stability of Nickel/Alumina for the Hydrogenation of 5-Hydroxymethylfurfural in Water. *ChemSusChem* **2016**, *9*, 521-531.
7. Kumalapatni, A. J.; Bottari, G.; Erne, P. M.; Heeres, H. J.; Barta, K. Tunable and selective conversion of 5-HMF to 2,5-furandimethanol and 2,5-dimethylfuran over copper-doped porous metal oxides. *ChemSusChem* **2014**, *7*, 2266-2275.
8. Zhu, Y.; Kong, X.; Zheng, H.; Ding, G.; Zhu, Y.; Li, Y.-W. Efficient synthesis of 2,5-dihydroxymethylfuran and 2,5-dimethylfuran from 5-hydroxymethylfurfural using mineral-

- derived Cu catalysts as versatile catalysts. *Catalysis Science & Technology* **2015**, *5*, 4208-4217.
9. Yao, S.; Wang, X.; Jiang, Y.; Wu, F.; Chen, X.; Mu, X. One-Step Conversion of Biomass-Derived 5-Hydroxymethylfurfural to 1,2,6-Hexanetriol Over Ni–Co–Al Mixed Oxide Catalysts Under Mild Conditions. *ACS Sustainable Chemistry & Engineering* **2013**, *2*, 173-180.
  10. Sarkar, Ch.; Paul, R.; Shit, S. Ch.; Trinh, Q. T.; Koley, P.; Rao, B. S.; Beale, A. M.; Pao, Ch. W.; Banerjee, A.; Mondal J. Navigating Copper-Atom-Pair Structural Effect inside a Porous Organic Polymer Cavity for Selective Hydrogenation of Biomass-Derived 5-Hydroxymethylfurfural. *ACS Sustainable Chem. Eng.* **2021**, *9*, 5, 2136–2151

**Table S3.** BE of surface elements from X-ray photoelectron spectroscopy

| Sample                                                  | Fe 2p <sub>3/2</sub> BE (eV) <sup>a-c</sup> (%) <sup>d</sup> |                  |                  | Cu 2p <sub>3/2</sub> BE (eV) (%) <sup>d</sup> |                  | $\alpha'$ <sup>e</sup> |
|---------------------------------------------------------|--------------------------------------------------------------|------------------|------------------|-----------------------------------------------|------------------|------------------------|
|                                                         | Fe <sup>2+</sup>                                             | Fe <sup>3+</sup> | Fe <sup>0</sup>  | Cu <sup>+/Cu<sup>0</sup></sup>                | Cu <sup>2+</sup> |                        |
| Fe@C                                                    | 709.9<br>(81.8%)                                             | 712.3<br>(18.2%) | --               | --                                            | --               |                        |
| Fe@C-H <sub>2</sub>                                     | 709.5<br>(72.2%)                                             | 711.8<br>(17.9%) | 707.0<br>(9.8%)  | --                                            | --               |                        |
| Cu <sub>0.24</sub> Fe <sub>0.76</sub> @C                | 710.1<br>(62.3%)                                             | 712.3<br>(37.7%) |                  | 932.7<br>(11%)                                | 934.1<br>(89%)   | 1852.7<br>1849.7       |
| Cu <sub>0.24</sub> Fe <sub>0.76</sub> @C-H <sub>2</sub> | 710.1<br>(51.8%)                                             | 712.8<br>(19.8%) | 708.1<br>(28.3%) | 931.7<br>(38.9%)                              | 934.0<br>(61.1%) | 1851.3                 |

a) Peng Li, E.Y. Jiang, H.L. Bai J. Phys. D: Appl. Phys.44 (2011) 075003

b) Mark C. Biesinger, Brad P. Payne, Andrew P. Grosvenor, Leo. W. M. Lau, Andrea R. Gerson, Roger St. C. Smart, Appl. Surf. Sci. 257 (2011) 2717-2730

c) Toru Yamashita, P. Hayes, Appl. Surf. Sci. 254 (2008) 2441-2449

d) In brackets the atomic percent of each component

e) Auger parameter  $\alpha' = \text{BE}(\text{Cu}^+/\text{Cu}^0) + \text{KE}(\text{Cu LMM})$ ; (Cu<sup>0</sup>) = 1851.3 eV; (Cu<sup>+</sup>) = 1849.7eV; (Cu<sup>2+</sup>) = 1852.7eV

**Table S4.** Catalytic performance of noble metal catalysts for hydrogenation of 5-(hydroxymethyl)furfural (HMF) to 2,5-Bis(hydroxymethyl)furan (BHMF).

| Catalyst                              | Solid Catalyst /mg | Metal /mg | HMF/ mmol | Temp./ °C | H <sub>2</sub> / MPa | Time /h | HMF Conversion/% | Yield to BHMF/% | Selectivity to BHMF/% | Ref.      |
|---------------------------------------|--------------------|-----------|-----------|-----------|----------------------|---------|------------------|-----------------|-----------------------|-----------|
| Au/Al <sub>2</sub> O <sub>3</sub>     | 10                 | 0.083     | 2         | 120       | 6.5                  | 2       | 100              | >96             | >96                   | 1         |
| Pd/C                                  | 8                  | 0.4       | 1.19      | 80        | 10                   | 20      | 97               | 82              | 84.5                  | 2         |
| Pt/C                                  | 10                 | 0.5       | 1         | 23        | 1.4                  | 18      | -                | 82              |                       | 3         |
| PtSn/SnO <sub>2</sub> /RGO            | -                  | -         | 8         | 70        | 2                    | 0.5     | >99              | >99             | >99                   | 4         |
| Ru/C                                  | 250                | 12.5      | 5.56      | 60        | 5                    | 0.7     | 100              | 100             | 100                   | 5         |
| Ru(OH) <sub>x</sub> /ZrO <sub>2</sub> | 15                 | 0.3       | 0.97      | 120       | 1.5                  | 6       | 99               | 99              | 100                   | 6         |
| Ir/TiO <sub>2</sub>                   | 50                 | 2.5       | 1.07      | 50        | 6                    | 3       | 99               | 95              | 96                    | 7         |
| CuFe@C                                | 10                 | 10        | 0.5       | 110       | 1                    | 6       | 94               | 93              | >99                   | This work |

## References

1. J. Ohyama, A. Esaki, Y. Yamamoto, S. Arai, A. Satsuma, *RSC Adv.* **2013**, *3*, 1033–1036.
2. F. Liu, M. Audemar, K. De Oliveira Vigier, J. M. Clacens, F. De Campo, F. Jérôme, *Green Chem.* **2014**, *16*, 4110–4114.
3. M. Balakrishnan, E. R. Sacia, A. T. Bell, *Green Chem.* **2012**, *14*, 1626–1634.
4. J. Shi, M. Zhang, W. Du, W. Ning, Z. Hou, *Catal. Sci. Technol.* **2015**, *5*, 3108–3112.
5. B. Op De Beeck, M. Dusselier, J. Geboers, J. Holsbeek, E. Morré, S. Oswald, L. Giebel, B. F. Sels, *Energy Environ. Sci.* **2015**, *8*, 230–240.
6. J. Han, Y. H. Kim, B. Y. Jung, S. H. Hwang, J. Jegal, J. W. Kim, Y. S. Lee, *Synlett* **2017**, *28*, 2299–2302.
7. H. Cai, C. Li, A. Wang, T. Zhang, *Catal. Today* **2014**, *234*, 59–65.

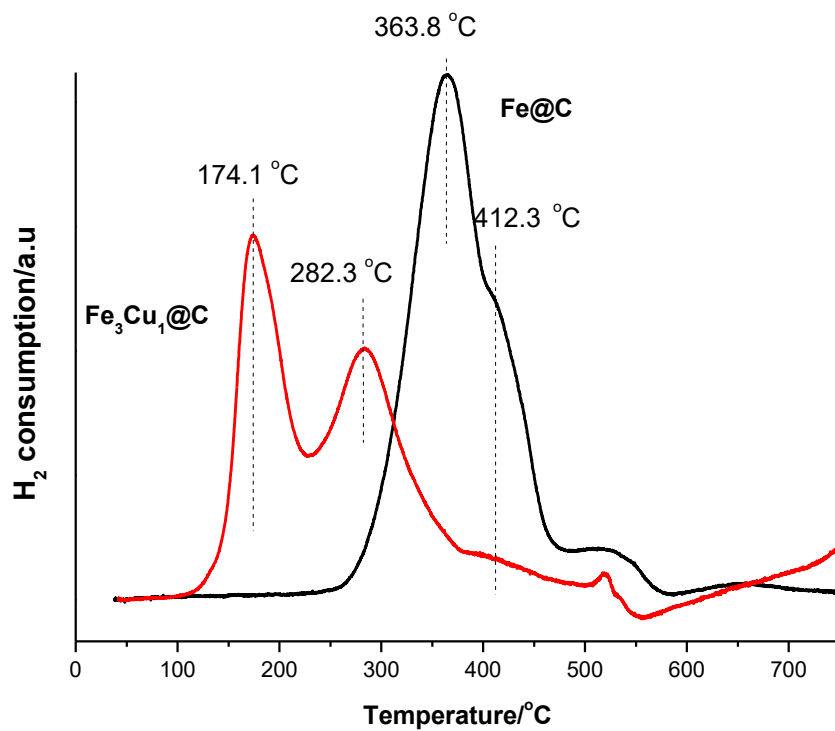

**Figure S55.** H<sub>2</sub>-Temperature-programmed reduction (TPR) profiles of Fe<sub>3</sub>Cu<sub>1</sub>@C and Fe@C samples.

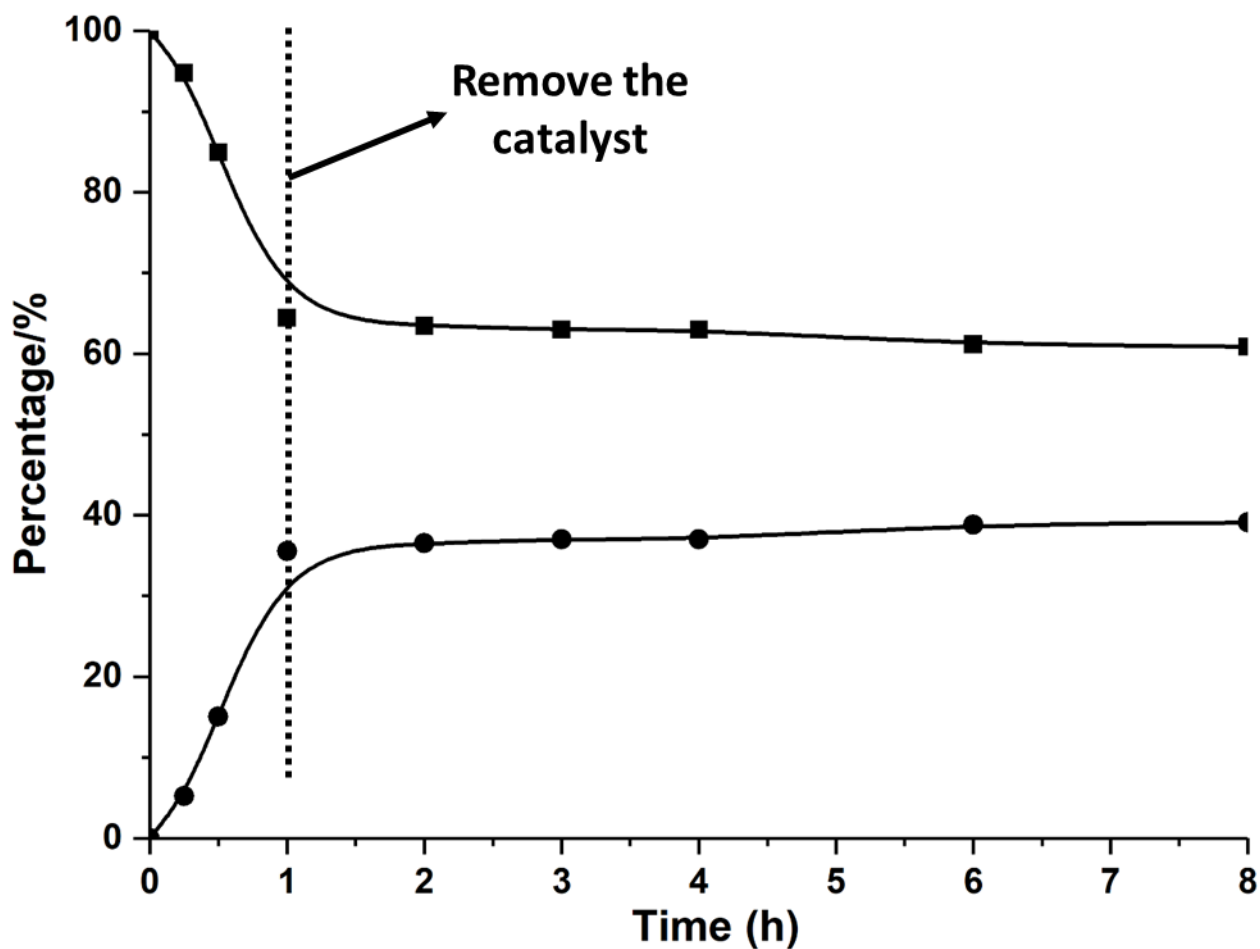

**Figure S56.** Leaching test with catalyst removal during the reaction course. Reaction conditions: 0.5 mmol HMF, 10 mg of  $\text{Cu}_{0.24}\text{Fe}_{0.76}@C$  as the catalyst, 5 mL methanol as solvent, 110 °C, and 10 bar of  $\text{H}_2$ . After 1 h, the catalyst was removed and the reaction was continued. HMF (■), BHMF (●).

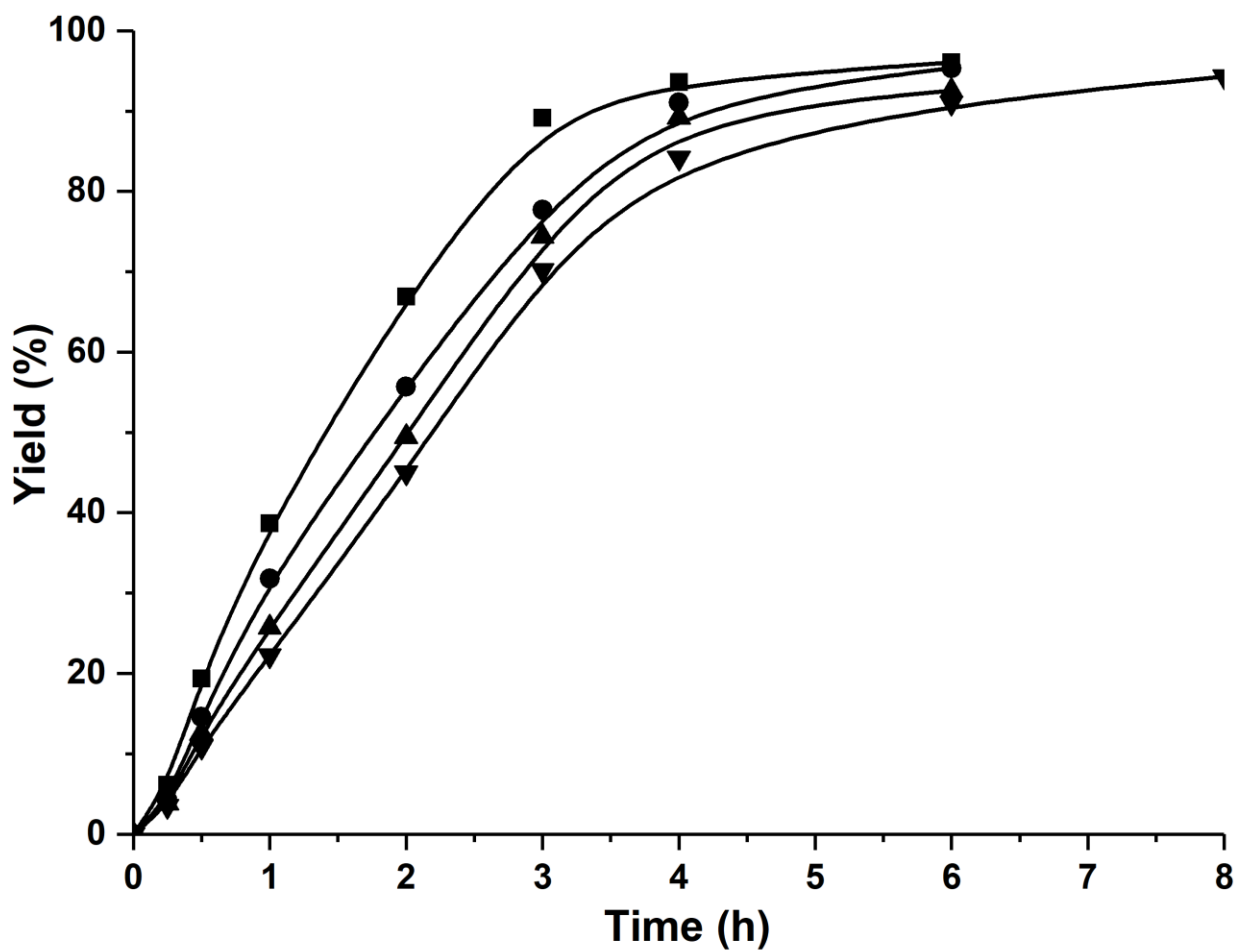

**Figure S57.** The catalytic performances of recycled  $\text{Cu}_{0.24}\text{Fe}_{0.76}@C$  NPs in reduction of HMF to BHMF. Reaction conditions: Reaction conditions: HMF (0.5 mmol, 63 mg), 10 mg of catalyst, MeOH (solvent, 5 mL), dodecane as internal standard, 110 °C. and 10 bar of  $\text{H}_2$ . First use (■), second use (●), third use (▲), and fourth use (▼).

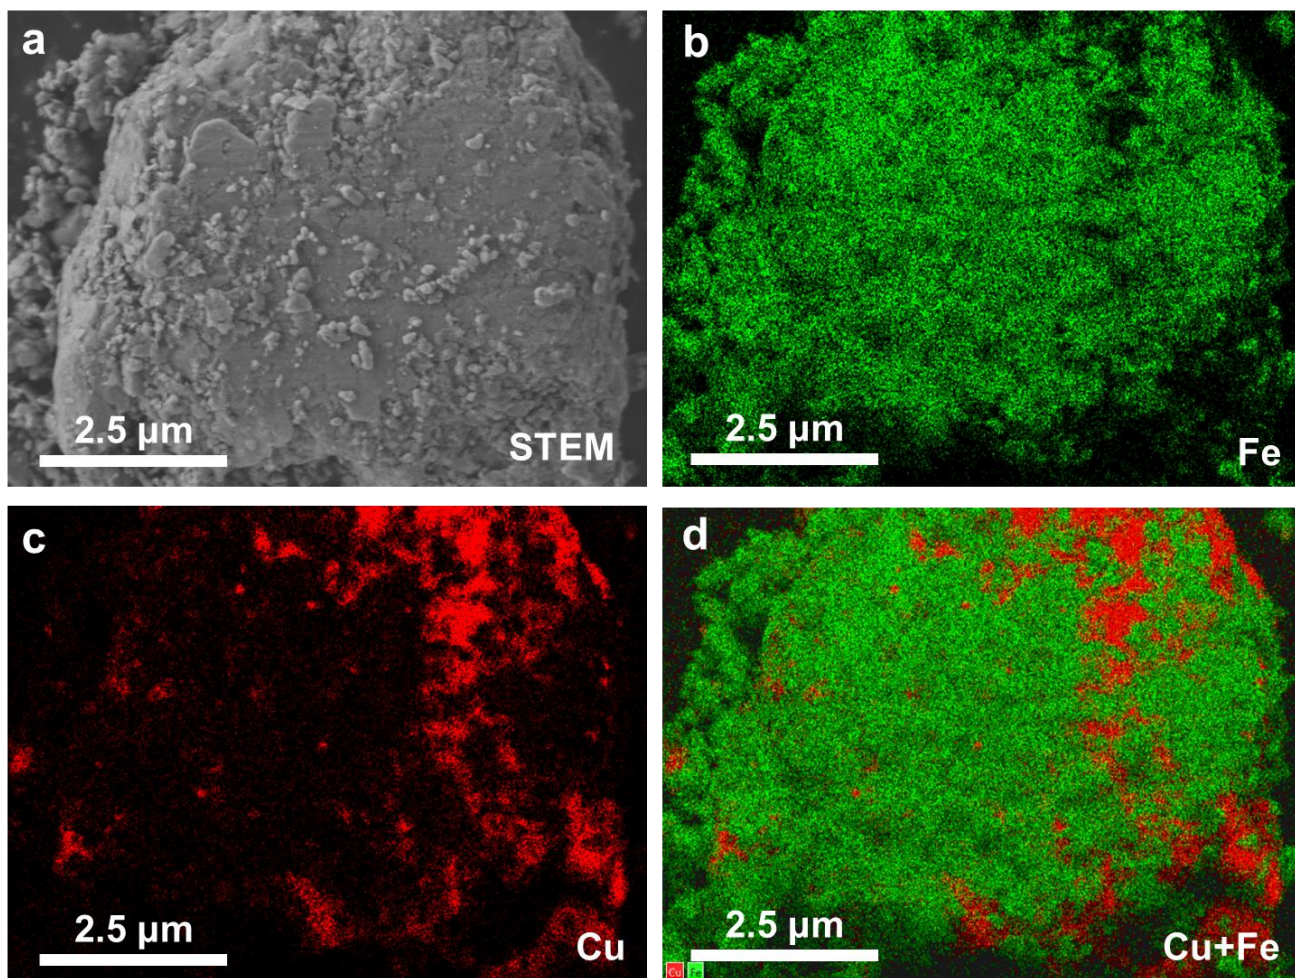

**Figure S58.** FESEM image and corresponding EDS mapping on the distribution of Fe and Cu in the used  $\text{Cu}_{0.24}\text{Fe}_{0.76}@\text{C}$  sample after four catalytic runs for hydrogenation of HMF.



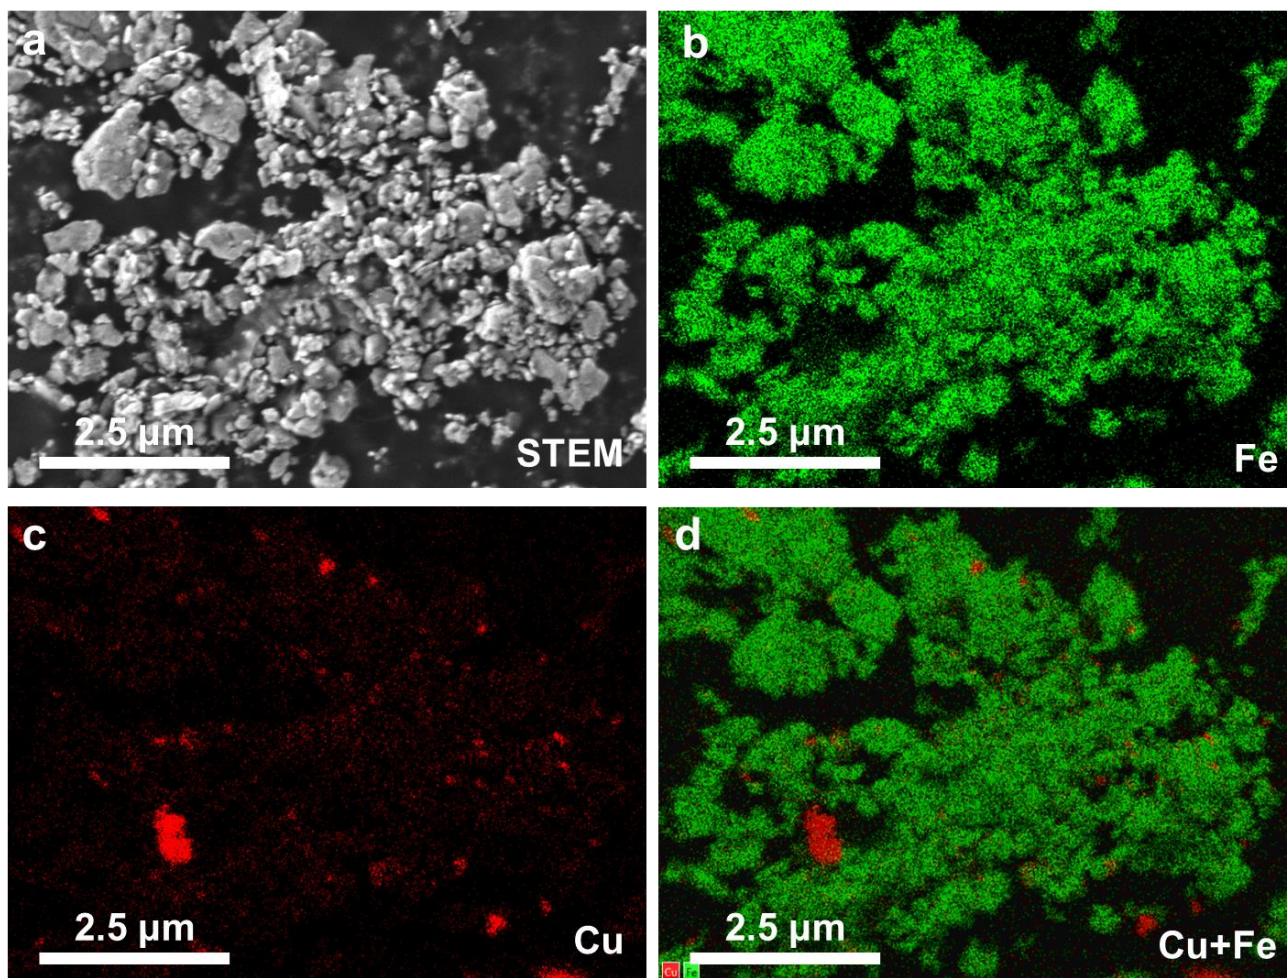

**Figure S59.** FESEM image and corresponding EDS mapping on the distribution of Fe and Cu in the used  $\text{Cu}_{0.24}\text{Fe}_{0.76}@C$  sample after four catalytic runs for hydrogenation of HMF.

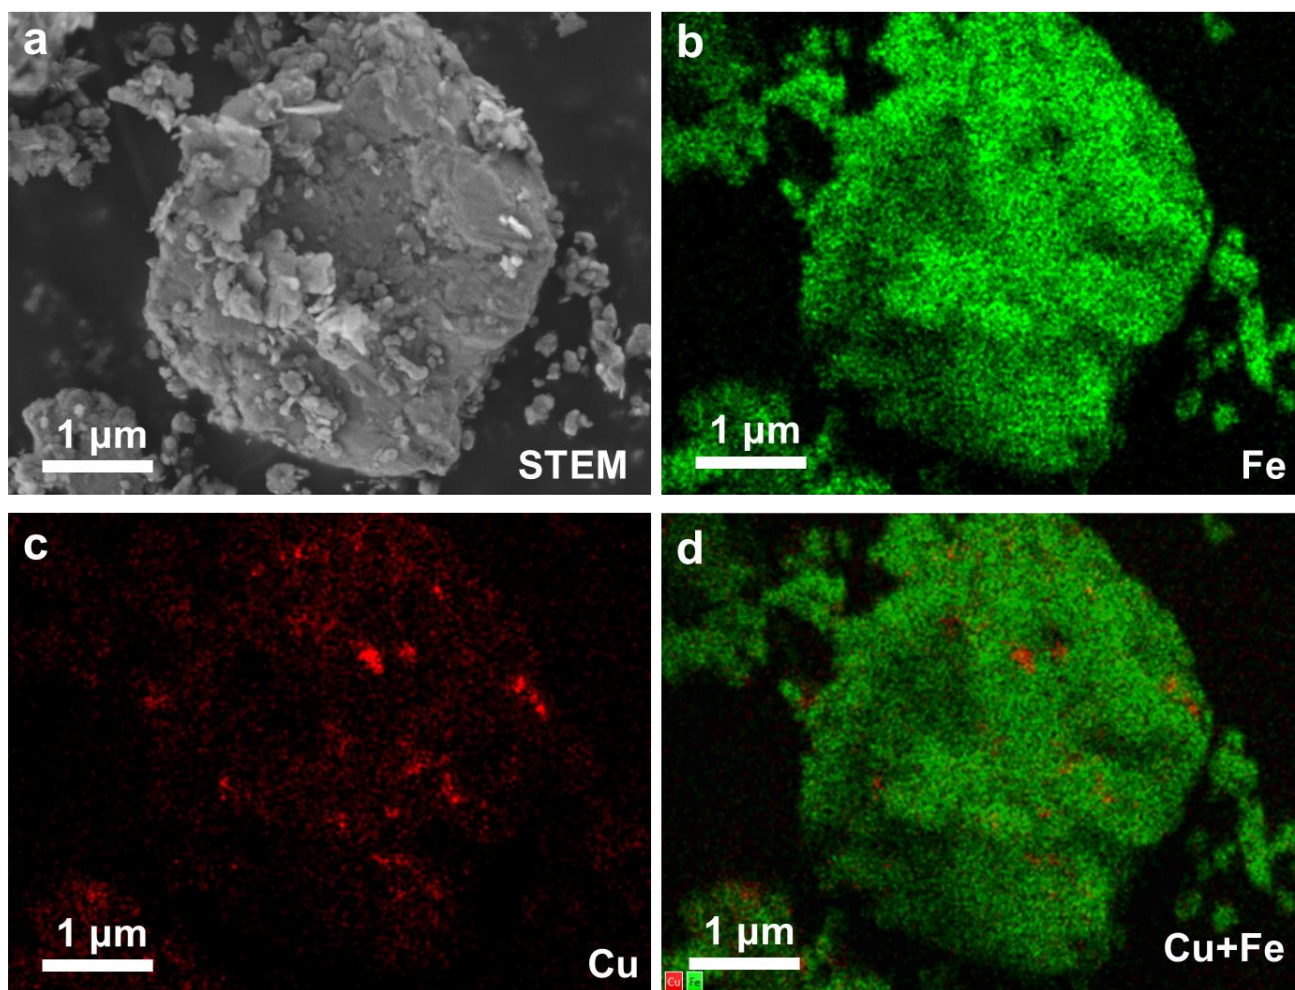

**Figure S60.** FESEM image and corresponding EDS mapping on the distribution of Fe and Cu in the used  $\text{Cu}_{0.24}\text{Fe}_{0.76}@C$  sample after four catalytic runs for hydrogenation of HMF.

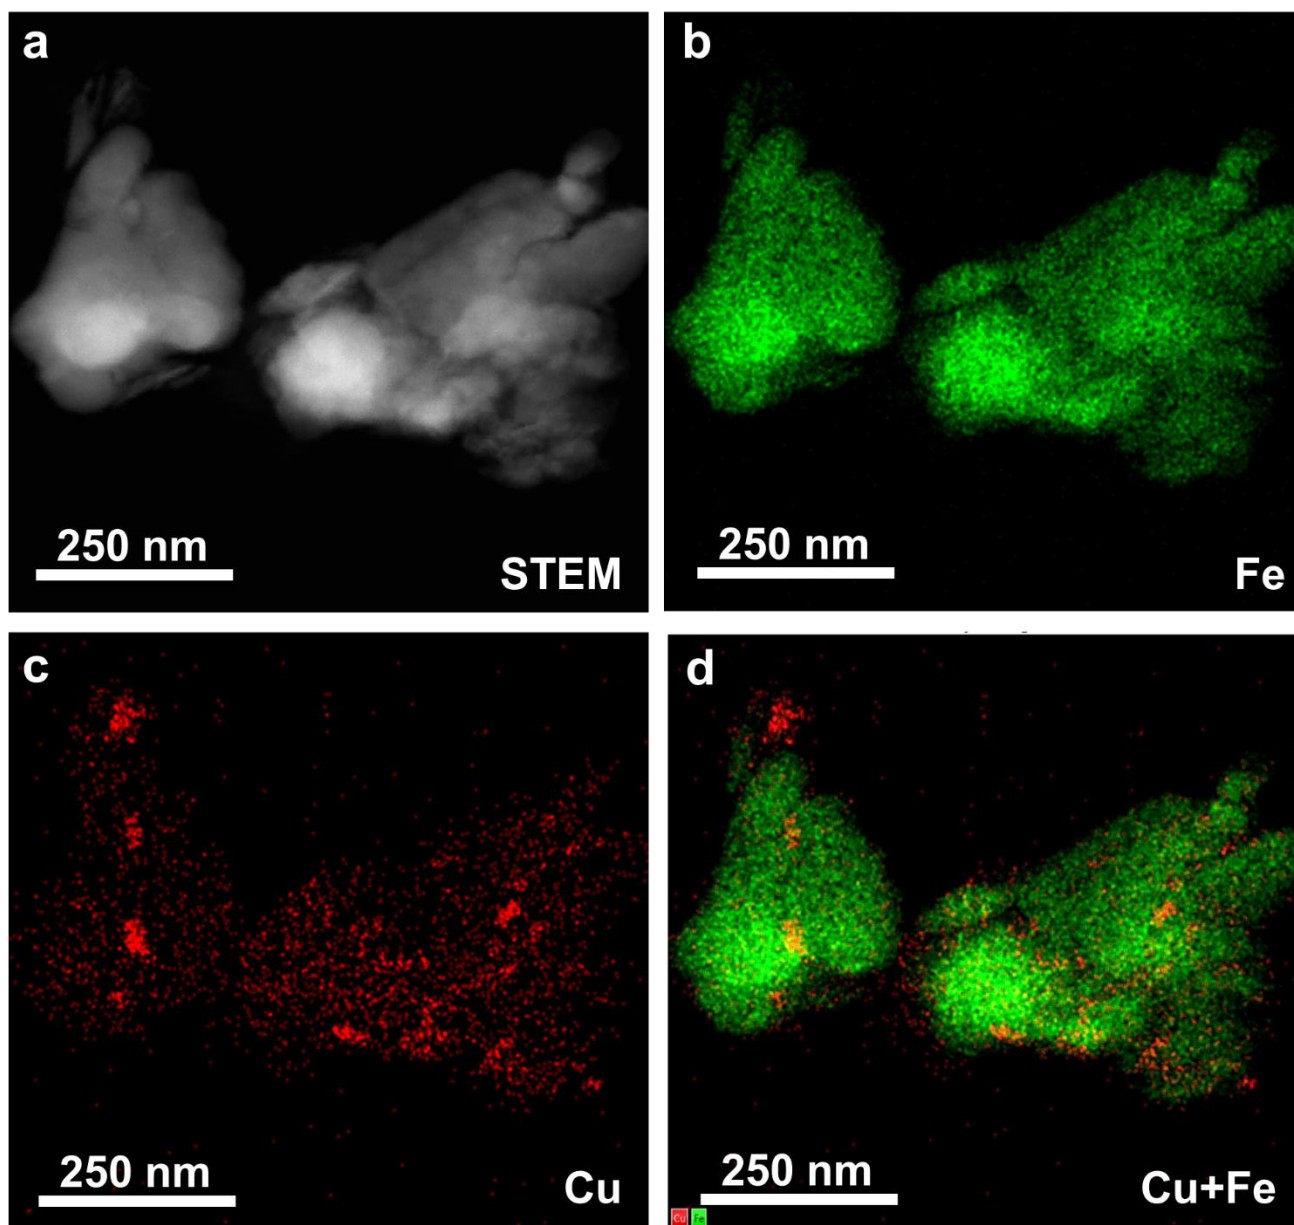

**Figure S61.** FESEM image and corresponding EDS mapping on the distribution of Fe and Cu in the used  $\text{Cu}_{0.24}\text{Fe}_{0.76}@C$  sample after four catalytic runs for hydrogenation of HMF.

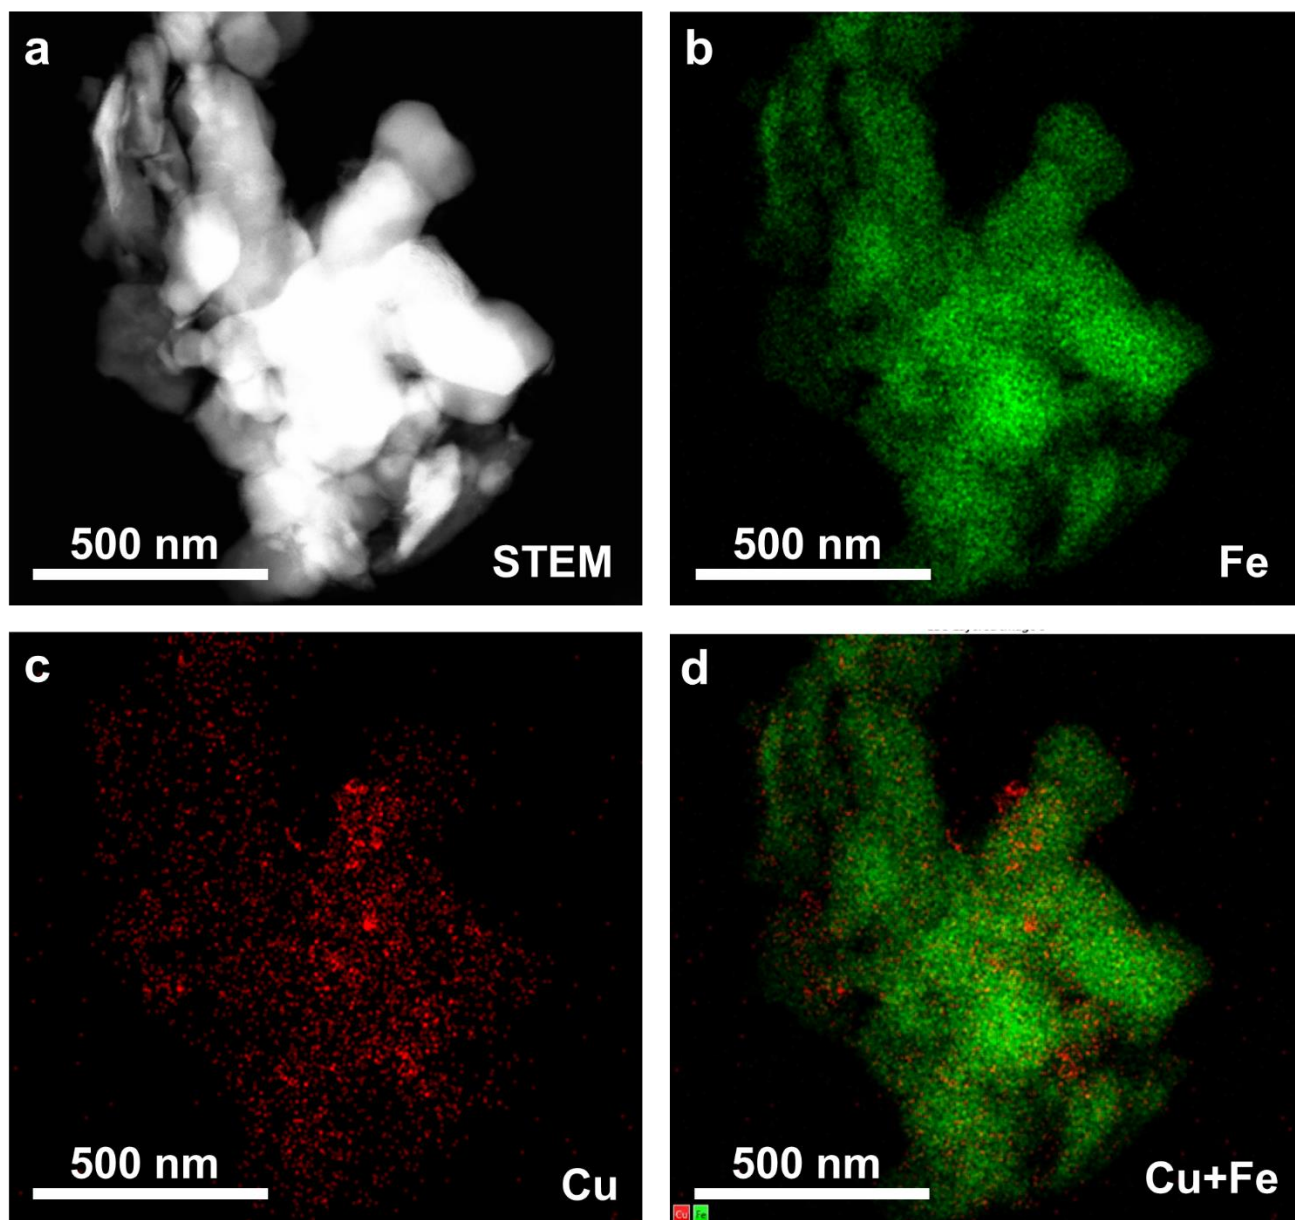

**Figure S62.** FESEM image and corresponding EDS mapping on the distribution of Fe and Cu in the used  $\text{Cu}_{0.24}\text{Fe}_{0.76}@C$  sample after four catalytic runs for hydrogenation of HMF.

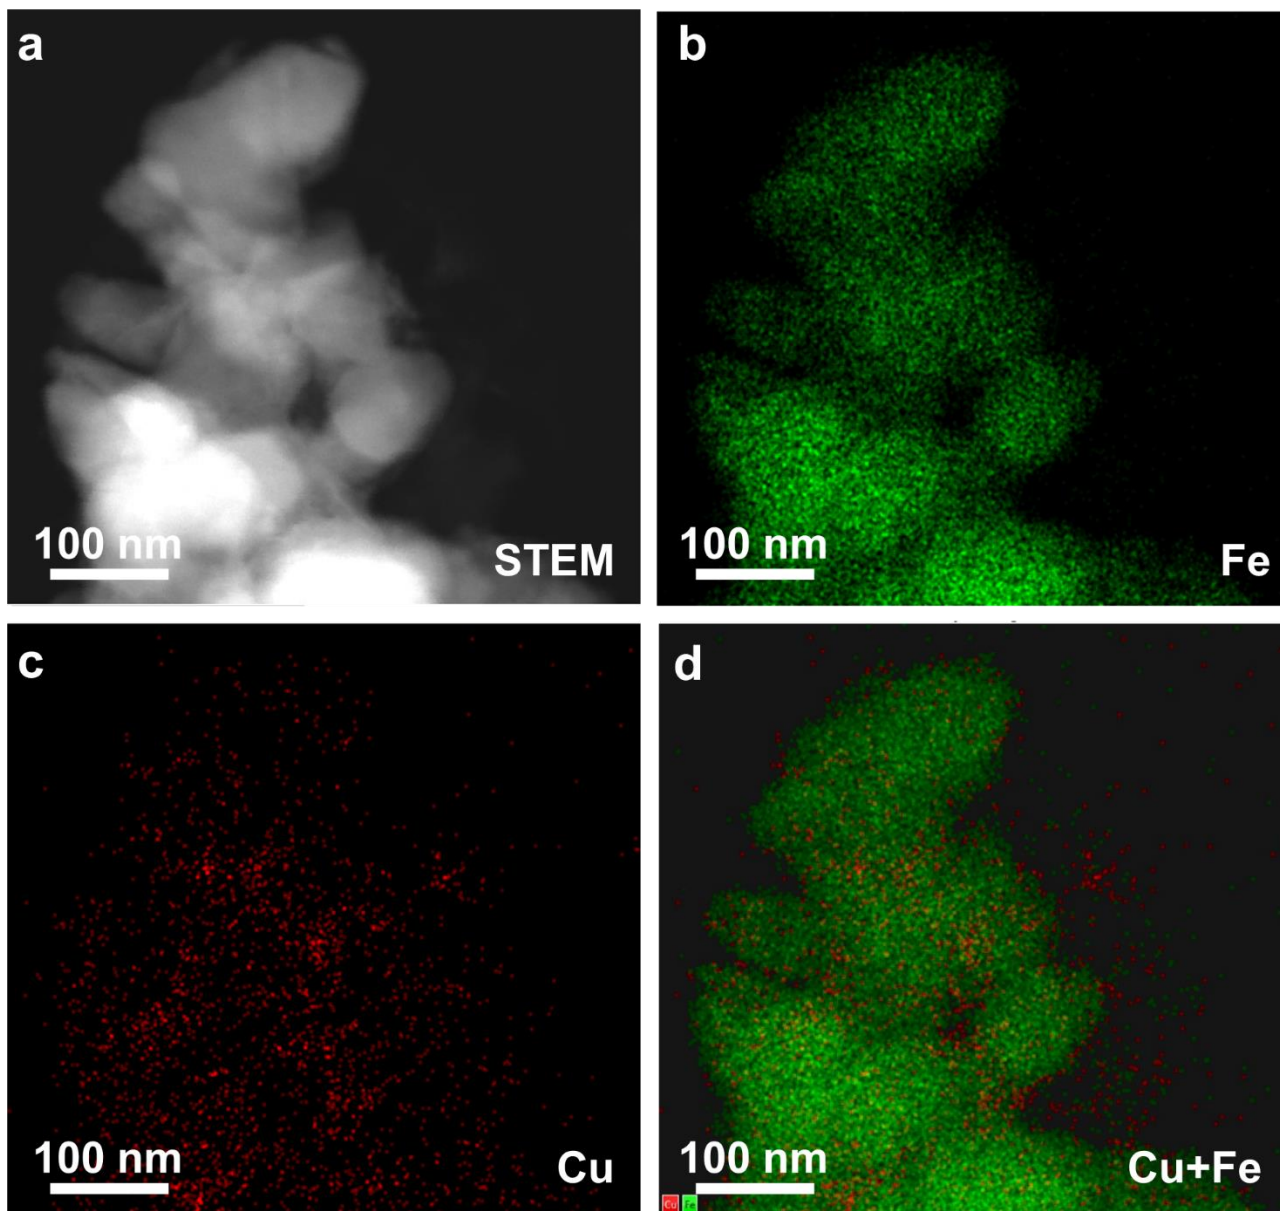

**Figure S63.** FESEM image and corresponding EDS mapping on the distribution of Fe and Cu in the used  $\text{Cu}_{0.24}\text{Fe}_{0.76}@C$  sample after four catalytic runs for hydrogenation of HMF.
